# Supplementary material for: Visible-light-driven PhSSPh-catalysed regioselective hydroborylation of α,β-unsaturated carbonyl compounds with NHC-boranes
Source: Royal Society of Chemistry journal article supplement (doi:10.1039/d2cc02846h), 2022-01-01
Supplement: d2cc02846h1.pdf [file d2cc02846h1.pdf]

## Supporting information

### Visible-light-driven PhSSPh-catalysed regioselective hydroborylation of $\alpha,\beta$ -unsaturated carbonyl compounds with NHC-boranes

Xinghua Liu,<sup>a†</sup> Yujing Shen,<sup>a†</sup> Cheng Lu,<sup>a</sup> Yongchan Jian,<sup>a</sup> Shuangshuang Xia,<sup>a</sup>  
Zhaoliang Gao,<sup>a</sup> Yihan Zheng,<sup>a</sup> Yuanyuan An<sup>\*,a</sup> and Yubin Wang<sup>\*,a</sup>

*<sup>a</sup>School of Pharmaceutical Sciences, Nanjing Tech University, Nanjing 211816,  
P. R. China*

#### Table of contents

|                                                                            |     |
|----------------------------------------------------------------------------|-----|
| 1. General information                                                     | S2  |
| 2. Optimization of reaction conditions                                     | S3  |
| 3. Experimental section                                                    | S4  |
| 4. Analytical data for products                                            | S11 |
| 5. References                                                              | S26 |
| 6. <sup>1</sup> H NMR, <sup>13</sup> C NMR and <sup>19</sup> F NMR spectra | S27 |

## 1. General Information

Unless otherwise declared, all the reagents were bought from commercial suppliers and used without additional purification. A glass tube (35 mL) with a rubber plug was used in hydroboration reactions unless otherwise noted. NHC-boranes reagent was prepared according to a previously reported procedure<sup>1</sup>. Thin layer chromatography (TLC) was performed on commercial silica gel plates and flash column chromatography was performed with 300-400 mesh silica gel cartridge. Visualization of TLC achieved using ultraviolet light (254 nm) or staining with Iodine. NMR spectra were recorded on a BRUKER AVANCE III 400 spectrometer (400 MHz for <sup>1</sup>H; 376 MHz for <sup>19</sup>F; 100 MHz for <sup>13</sup>C) instruments and are referenced relative to CDCl<sub>3</sub> ( $\delta$  7.26 ppm for <sup>1</sup>H, 77.16 ppm for <sup>13</sup>C) using TMS as internal standard. Resonances of hydrogen or carbon atoms bonded to the boron atom are weak (sometimes absent) in both <sup>1</sup>H or <sup>13</sup>C NMR spectra. Note: The protons on boron atom in the <sup>1</sup>H-NMR spectrum and the carbene carbon atom attached to the boron atom in the <sup>13</sup>C NMR spectrum are not detected owing to quadrupole broadening and spin-spin coupling with boron. Data are recorded as follows: chemical shift, multiplicity (s = singlet, d = doublet, t = triplet, q = quartet, m = multiplet, brs = broad singlet), coupling constant (*J*) in Hertz (Hz), and integration. High-resolution mass spectra (HRMS) were obtained on an Agilent mass spectrometer with electro spray ionization (ESI) as the ion source.

## 2. Optimization of reaction conditions

**Table S1.** Optimization of reaction conditions.<sup>a</sup>

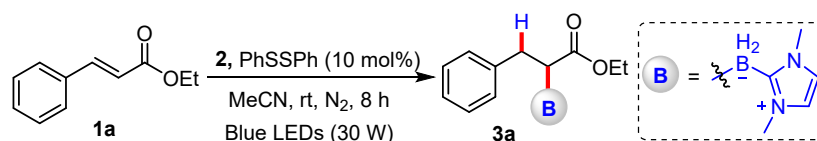

| Entry | Variation of standard conditions | Yield [%] <sup>b</sup> |
|-------|----------------------------------|------------------------|
| 1     | <b>none</b>                      | <b>95</b>              |
| 2     | MeOH instead of MeCN             | 91                     |
| 3     | DCE instead of MeCN              | 20                     |
| 4     | THF instead of MeCN              | 24                     |
| 5     | toluene instead of MeCN          | 66                     |
| 6     | 1,4-dioxane instead of MeCN      | 27                     |
| 7     | DMF instead of MeCN              | 48                     |
| 8     | DCM instead of MeCN              | 26                     |
| 9     | BnSSBn instead of PhSSPh         | NR                     |
| 10    | 1.0 equiv of <b>2</b>            | 79                     |
| 11    | 30 W CFL                         | 21                     |
| 12    | 5 mol% of PhSSPh                 | 34                     |
| 13    | without PhSSPh                   | NR                     |
| 14    | no light irradiation             | NR                     |
| 15    | without N <sub>2</sub>           | trace                  |

<sup>a</sup> Standard reaction conditions: ethyl cinnamate **1a** (0.3 mmol), 1,3-dimethylimidazol-2-ylidene borane **2** (0.45 mmol), PhSSPh (10 mol%), blue LEDs (30 W), and solvent (2 mL), at room temperature for 8 h under N<sub>2</sub> atmosphere. The reaction was conducted at room temperature, but the solution temperature was increased to 30°C upon the irradiation by blue LEDs. <sup>b</sup> Isolated yield. NR = no reaction.

### 3. Experimental section

(1) Starting substrates were commercially available as below:

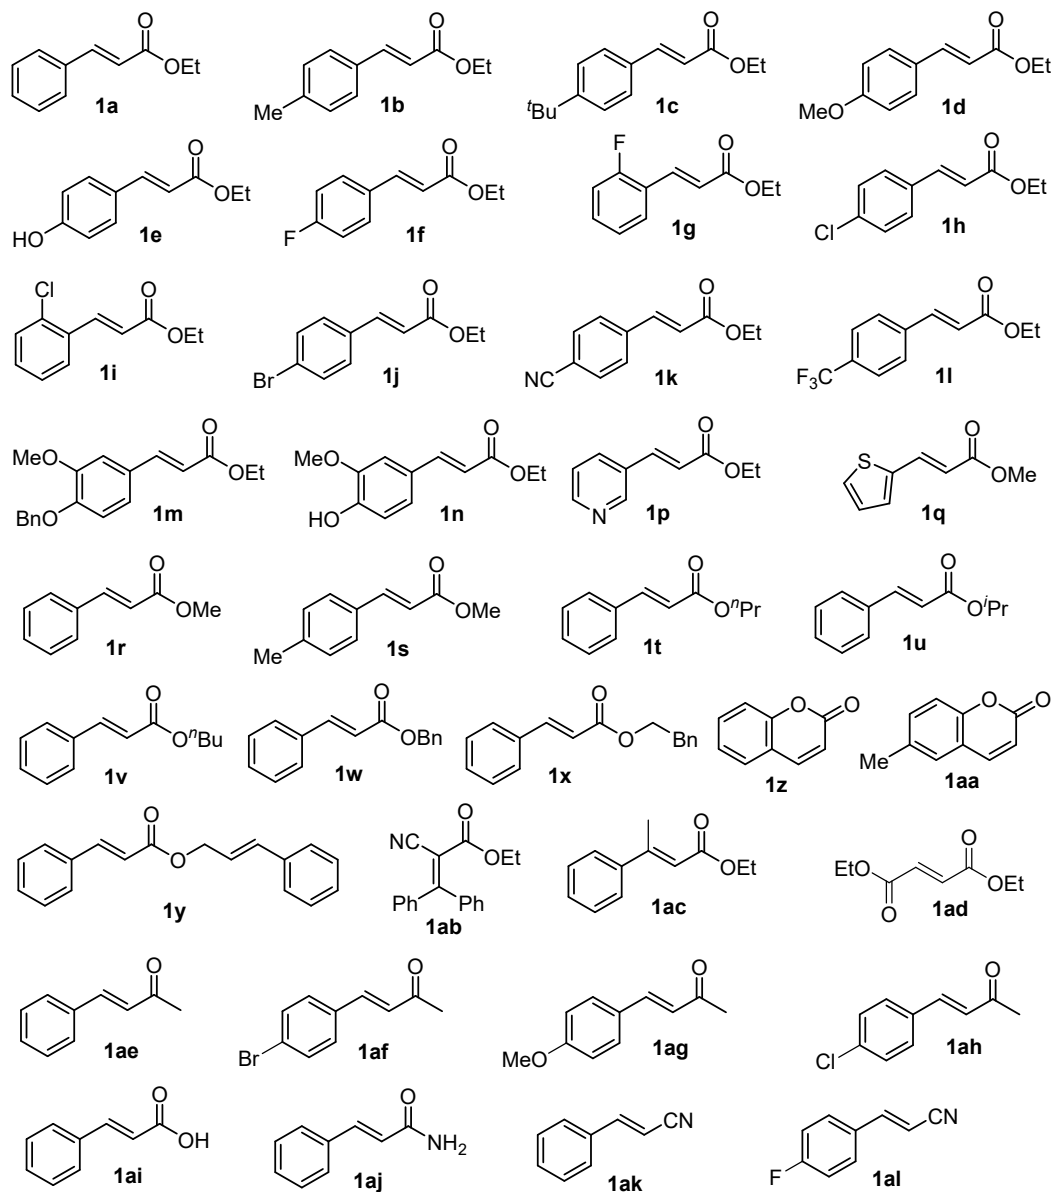

(2) Synthesis of Substrates.

Synthesis of Substrate 1o:

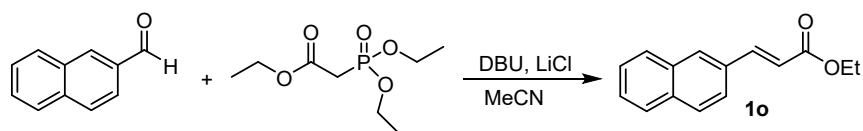

To a stirred slurry of LiCl (0.67 g, 14.2 mmol) in MeCN (80 mL) was added triethyl phosphonoacetate (2.9 mL, 12.8 mmol) and 2-naphthaldehyde (2.0 g, 12.8 mmol) at 0°C. After stirring for 5 minutes at 0°C, DBU (1.9 mL, 12.8 mmol) was added and then the reaction mixture was stirred at room temperature overnight. The resulting

slurry was diluted with diethyl ether (200 mL), washed with sat.  $\text{NH}_4\text{Cl}$  (100 mL), brine (100 mL), dried over anhydrous  $\text{MgSO}_4$ , filtered through celite (diethyl ether) and concentrated. The residue was purified by column chromatography on silica gel (petroleum ether/EtOAc – 20/1) to yield the corresponding compound **1o**. The spectral data are in good agreement with previous reports.<sup>2</sup>

**$^1\text{H}$  NMR** (400 MHz,  $\text{CDCl}_3$ )  $\delta$  7.92 (s, 1H), 7.87-7.81 (m, 4H), 7.66 (dd,  $J = 8.6, 1.8$  Hz, 1H), 7.53-7.48 (m, 2H), 6.55 (d,  $J = 16.0$  Hz, 1H), 4.29 (q,  $J = 7.1$  Hz, 2H), 1.36 (t,  $J = 7.1$  Hz, 3H) ppm.  **$^{13}\text{C}$  NMR** (100 MHz,  $\text{CDCl}_3$ )  $\delta$  166.0, 143.6, 133.2, 132.2, 130.9, 128.9, 127.6, 127.5, 126.7, 126.2, 125.7, 122.5, 117.4, 59.5, 13.3 ppm.

### Synthesis of Substrate **1am**<sup>3</sup>:

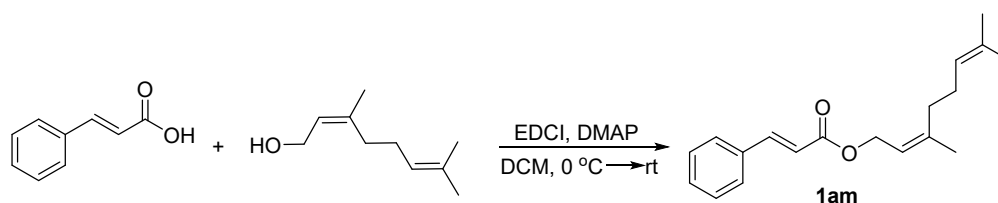

To a 50 mL round bottom flask, cinnamic acid (6.75 mmol, 1.0 g), nerol (8.10 mmol, 1.3 g) and  $\text{DCM}$  (15 mL) was added under  $\text{N}_2$  atmosphere. After the solution was stirred at  $0\text{ }^\circ\text{C}$  for 5 min, EDCI (8.10 mmol, 1.6 g) and DMAP (0.675 mmol, 82.0 mg) were added, then the reaction mixture was stirred at room temperature. After completion of the reaction as indicated by TLC, anhydrous  $\text{Na}_2\text{SO}_4$  was added. After filtration, the filtrate was concentrated in vacuo to afford crude product which was further purified by column chromatography ( $\text{SiO}_2$ , PE: EA = 100:1) to afford the desired product **1am**.

**$^1\text{H}$  NMR** (400 MHz,  $\text{CDCl}_3$ )  $\delta$  7.69 (d,  $J = 16.0$  Hz, 1H), 7.52-7.50 (m, 2H), 7.38-7.36 (m, 3H), 6.45 (d,  $J = 16.0$  Hz, 1H), 5.44 (t,  $J = 7.2$  Hz, 1H), 5.12 (t,  $J = 7.0$  Hz, 1H), 4.70 (d,  $J = 7.2$  Hz, 2H), 2.18-2.10 (m, 4H), 1.79 (d,  $J = 0.9$  Hz, 3H), 1.69 (s, 3H), 1.61 (s, 3H) ppm.  **$^{13}\text{C}$  NMR** (100 MHz,  $\text{CDCl}_3$ )  $\delta$  167.0, 144.6, 142.7, 134.4, 132.1, 130.2, 128.8, 128.0, 123.5, 119.2, 118.2, 61.1, 32.2, 26.6, 25.7, 23.5, 17.6 ppm.

### Synthesis of Substrate **1an**<sup>3</sup>:

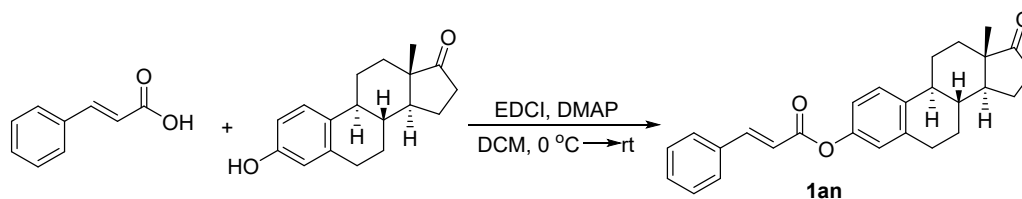

To a 50 mL round bottom flask, cinnamic acid (6.75 mmol, 1.0 g), estrone (8.10 mmol, 2.2 g) and DCM (15 mL) was added under N<sub>2</sub> atmosphere. After the solution was stirred at 0 °C for 5 min, EDCI (8.10 mmol, 1.6 g) and DMAP (0.675 mmol, 82.0 mg) were added, then the reaction mixture was stirred at room temperature. After completion of the reaction as indicated by TLC, anhydrous Na<sub>2</sub>SO<sub>4</sub> was added. After filtration, the filtrate was concentrated in vacuo to afford crude product which was further purified by column chromatography (SiO<sub>2</sub>, PE: EA = 8:1) to afford the desired product **1an**.

<sup>1</sup>H NMR (400 MHz, CDCl<sub>3</sub>) δ 7.85 (d, *J* = 16.0 Hz, 1H), 7.57 (s, 2H), 7.41 (s, 3H), 7.30 (d, *J* = 8.4 Hz, 1H), 6.94 (d, *J* = 8.4 Hz, 1H), 6.90 (s, 1H), 6.62 (d, *J* = 16.0 Hz, 1H), 2.93-2.91 (m, 2H), 2.53-2.47 (m, 1H), 2.42-2.39 (m, 1H), 2.31-2.27 (m, 1H), 2.16-1.95 (m, 4H), 1.62-1.45 (m, 6H), 0.91 (s, 3H) ppm. <sup>13</sup>C NMR (100 MHz, CDCl<sub>3</sub>) δ 165.7, 148.6, 146.4, 138.0, 137.3, 134.2, 130.7, 129.0, 128.3, 126.4, 121.6, 118.8, 117.3, 50.4, 47.9, 44.1, 38.0, 35.9, 31.5, 29.4, 26.3, 25.7, 21.6, 13.8 ppm.

### (3) General procedure for this regioselective hydroborylation of $\alpha,\beta$ -unsaturated carbonyl compounds with NHC-BH<sub>3</sub>.

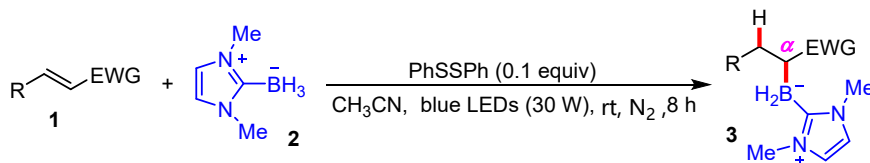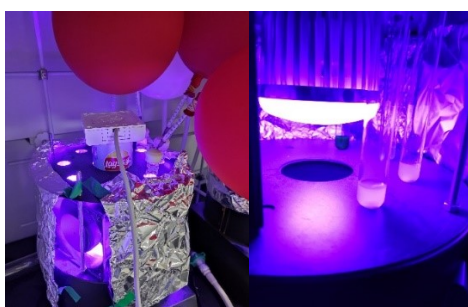

A dry glass tube (35 mL, 18 x 180 mm) equipped with a rubber plug and magnetic stir bar was charged with the electron-deficient alkenes **1** (0.30 mmol), NHC-BH<sub>3</sub> **2** (0.45 mmol), PhSSPh (6.6 mg, 10 mol%), and CH<sub>3</sub>CN (2 mL). The tube was evacuated and backfilled with N<sub>2</sub> for three times, then was tied up nitrogen balloons and placed approximately 5 cm from a 30 W blue LEDs light. The mixture was stirred at around 30 °C for 8 hours. The resulting mixture was then concentrated in vacuo to afford crude product which was further purified by column chromatography (SiO<sub>2</sub>) to afford the desired product.

#### (4) Gram Scale Reaction

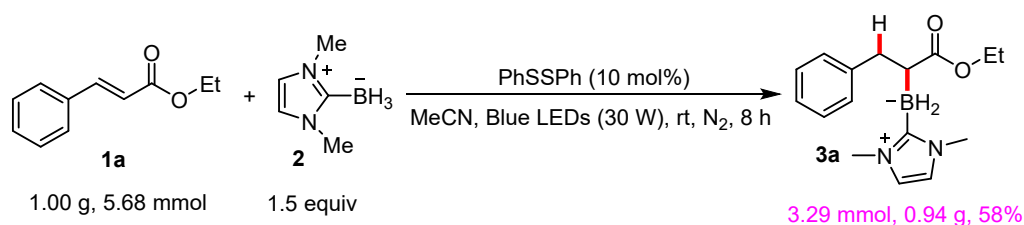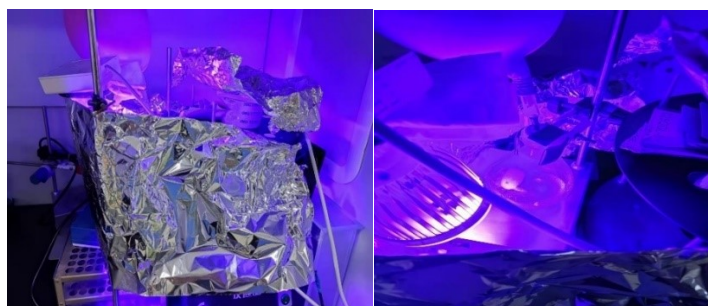

Add **1a** (1.00 g, 5.7 mmol), NHC-BH<sub>3</sub> (937 mg, 8.5 mmol), PhSSPh (124 mg, 10 mol%), and CH<sub>3</sub>CN (50 mL) to an eggplant flask (250 mL), then pump nitrogen three times, and finally tie up nitrogen balloon and placed approximately 3 cm from a 30 W blue LEDs light. The mixture was stirred at around 30 °C for 8 hours. The resulting mixture was then concentrated in vacuo to afford crude product which was further purified by column chromatography (SiO<sub>2</sub>) to afford the desired product **3a** as pale-yellow oil; yield: 58% (0.94 g, 3.3 mmol).

## (5) Control Experiments

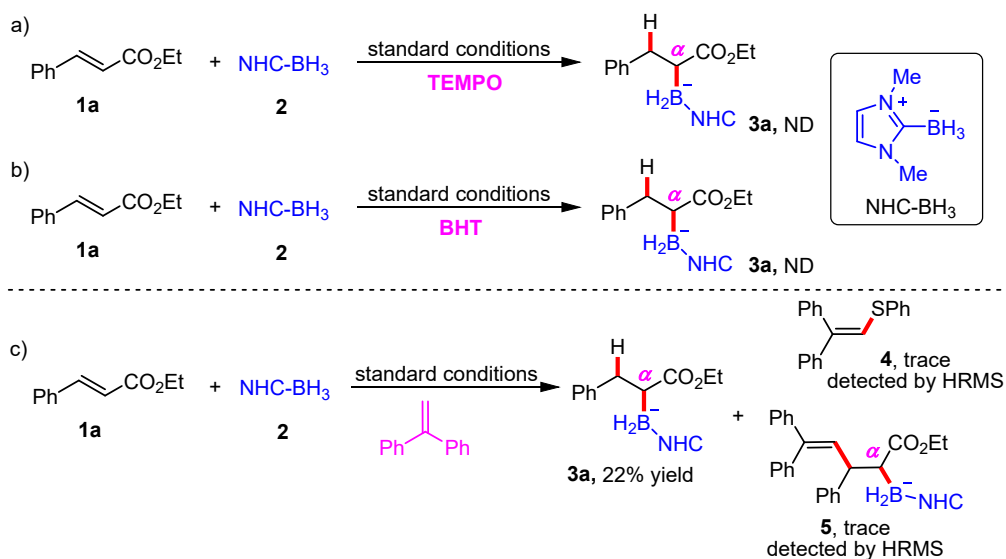

Three dry glass tubes (35 mL, 18 x 180 mm) equipped with rubber plugs and magnetic stir bar was charged with the cinnamate **1a** (0.30 mmol), NHC-borane **2** (0.45 mmol), PhSSPh (6.6 mg, 10 mol%), and MeCN (2 mL), respectively. Under the standard conditions, (a) adding 4.0 equiv. of 2,2,6,6-tetramethyl-1-piperidinyloxy (TEMPO) into the reaction system; (b) adding 4.0 equiv. of BHT (2,6-di-tert-butyl-4-methylphenol) into the reaction system; (c) adding 4.0 equiv. of radical scavenger 1,1-diphenylethylene into the reaction system. After the reactions were completed, the desired product **3a** could not be observed in reaction (a) and (b). While, product **3a** could be isolated in 22% yield in reaction (c). Additionally, adducts **4** and **5** was detected in reaction (c) by HRMS.

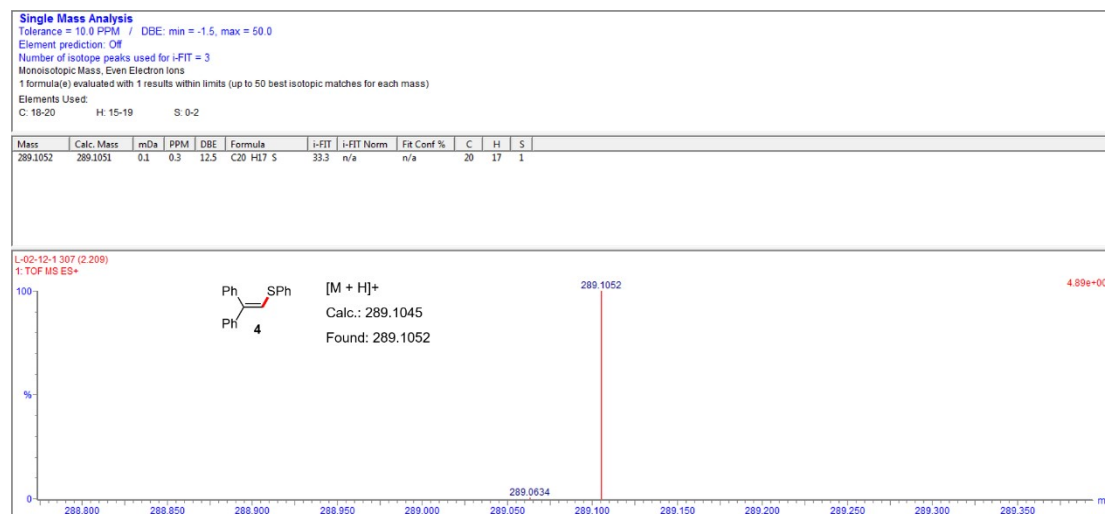

**Fig. S1** HRMS spectrum of compound **4**.



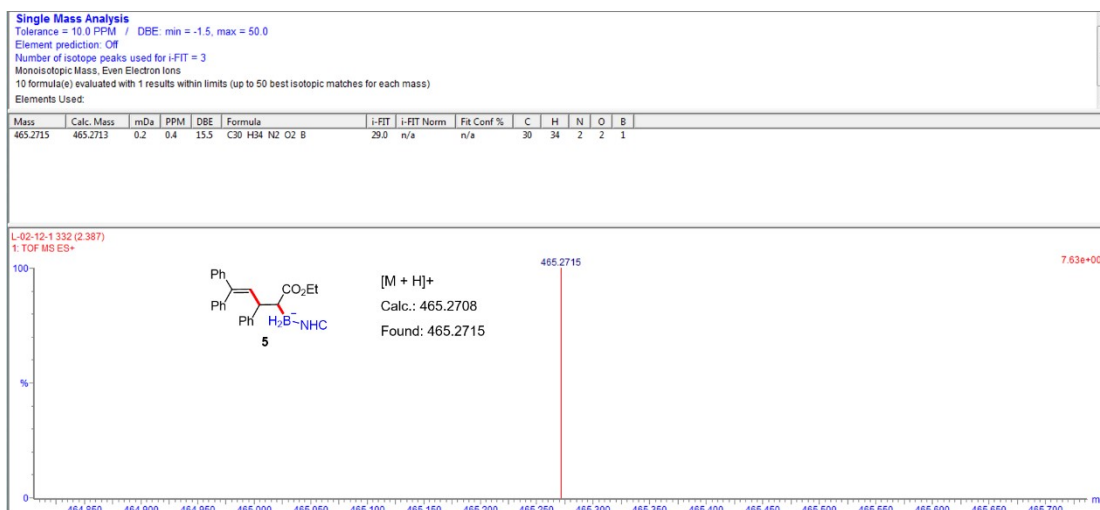

**Fig. S2** HRMS spectrum of compound **5**.

## (6) Determination of Quantum yield

According to previous reported procedures,<sup>4-6</sup> the actinometry measurements were determined by standard ferrioxalate actinometry.

**Preparation of potassium ferrioxalate solution (0.15 M):** Potassium ferrioxalate trihydrate (0.737 g) and 95~98% H<sub>2</sub>SO<sub>4</sub> (27 μL) were added to a 10 mL volumetric flask and filled to the mark with distilled water. The solution was stored in the dark.

**Preparation of buffer solution:** Dissolving 5.0 mg of phenanthroline and 1.13 g of sodium acetate in 5.0 mL of 0.5 M H<sub>2</sub>SO<sub>4</sub> solution. The solution was stored in the dark.

**The actinometry measurements:** To determine the photon flux of the spectrophotometer, 2.0 mL of the ferrioxalate solution was placed in a cuvette and irradiated with 30W blue LEDs ( $\lambda \approx 440$  nm) for 90.0 seconds. After irradiation, 0.35 mL of buffer solution was added to the cuvette. The solution was then stored in the dark for 1 h to allow the ferrous ions to completely coordinate to the phenanthroline. In a similar method, a blank solution (a non-irradiated sample) was also prepared. The absorbance of irradiated and non-irradiated samples at  $\lambda = 510$  nm was measured by UV-Vis spectrophotometry. Conversion was calculated using **Eq 1**,

$$\text{mol of } Fe^{2+} = \frac{V \cdot \Delta A}{l \cdot \epsilon} = \frac{(0.00235 \text{ L}) \cdot 2.532}{1 \text{ cm} \cdot 11100 \frac{\text{L}}{\text{mol}} \text{ cm}^{-1}} = 5.361 \cdot 10^{-7} \text{ mol} \quad (1)$$

Where:

V = the total volume (l) of the solution after addition of phenanthroline;

$\Delta A$  = the difference in absorbance at 510 nm between the irradiated and non-irradiated solutions;

l = the path length (l = 1 cm);

$\epsilon$  = the molar absorptivity at 510 nm ( $\epsilon = 11100 \text{ L} \cdot \text{mol}^{-1} \cdot \text{cm}^{-1}$ ).

Then, the photon flux can be calculated using **Eq 2**,

$$\text{Photon flux} = \frac{\text{mol of Fe}^{2+}}{\Phi \cdot t \cdot f} = \frac{\text{mol of Fe}^{2+}}{\Phi \cdot t \cdot (1 - 10^{-A})} = \frac{5.361 \cdot 10^{-7} \text{ mol}}{1.01 \cdot 90 \text{ s} \cdot 0.999} = 5.904 \cdot 10^{-9} \text{ einstein/s} \quad (2)$$

Where:

$\Phi$  = the quantum yield for the ferrioxalate actinometer ( $\Phi = 1.01$  at  $\lambda = 436 \text{ nm}$ );

t = irradiation time (t = 90 s);

A = the measured absorbance of the ferrioxalate actinometer solution at 440 nm (A = 3.000).

**Reaction quantum yield:** A dry glass tube equipped with a rubber plug and magnetic stir bar was charged with the ethyl cinnamate **1a** (0.20 mmol), NHC-BH<sub>3</sub> **2** (0.30 mmol), PhSSPh (4.4 mg, 10 mol%), and CH<sub>3</sub>CN (2 mL). The tube was evacuated and backfilled with N<sub>2</sub> for three times, then was tied up nitrogen balloons. The reaction mixture was stirred at room temperature (around 30 °C) for 60 min under 30W blue LEDs irradiation ( $\lambda \approx 440 \text{ nm}$ ). The solvent was removed in vacuo and the yield of product **3a** was determined by <sup>1</sup>H NMR based on 1,3,5-trimethoxybenzene as internal standard to be 17% (0.034 mmol). The quantum yield was determined using **Eq 3**,

$$\Phi = \frac{\text{mol of product}}{\text{flux} \cdot t \cdot f} = \frac{\text{mol of product}}{\text{flux} \cdot t \cdot (1 - 10^{-A})} = \frac{0.034 \cdot 10^{-3}}{5.904 \cdot 10^{-9} \cdot 3600 \cdot 0.332} = 4.8 \quad (3)$$

Where:

A = the measured absorbance of the reaction solution at 440 nm (A = 0.175).

The quantum yield ( $\Phi$ ) of this photoreaction was determined to be 4.8, which suggesting the reaction is proceed in a radical-chain mechanism.

#### 4. Analytical Data for Products

##### (1,3-Dimethyl-1*H*-imidazol-3-ium-2-yl)(1-ethoxy-1-oxo-3-phenylpropan-2-yl)dihydroborate<sup>7</sup> (3a)

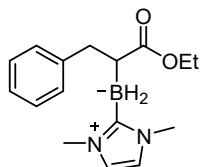

Yellow oil (95%, 81.6 mg). <sup>1</sup>H NMR (400 MHz, CDCl<sub>3</sub>) δ 7.22-7.17 (m, 4H), 7.12-7.06 (m, 1H), 6.79 (s, 2H), 3.84-3.79 (m, 2H), 3.71 (s, 6H), 3.12 (dd, *J* = 14.3, 10.2 Hz, 1H), 2.71 (dd, *J* = 14.3, 4.2 Hz, 1H), 2.18 (brs, 1H), 0.98 (t, *J* = 7.1 Hz, 3H) ppm. <sup>13</sup>C NMR (100 MHz, CDCl<sub>3</sub>) δ 180.6 (CO<sub>2</sub>Et), 143.8, 127.5, 126.8, 124.0, 119.4, 57.5 (CH<sub>2</sub>CH<sub>3</sub>), 38.1 (NCH<sub>3</sub>), 34.9 (ArCH<sub>2</sub>-), 13.3 (CH<sub>2</sub>CH<sub>3</sub>) ppm.

##### (1,3-Dimethyl-1*H*-imidazol-3-ium-2-yl)(1-ethoxy-1-oxo-3-(*p*-tolyl)propan-2-yl)dihydroborate<sup>7</sup> (3b)

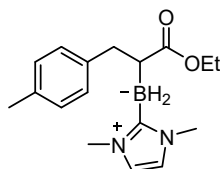

Yellow oil (96%, 86.2 mg). <sup>1</sup>H NMR (400 MHz, CDCl<sub>3</sub>) δ 7.10 (d, *J* = 8.0 Hz, 2H), 7.00 (d, *J* = 7.8 Hz, 2H), 6.80 (s, 2H), 3.84-3.75 (m, 2H), 3.73 (s, 6H), 3.08 (dd, *J* = 14.3, 10.3 Hz, 1H), 2.67 (dd, *J* = 14.3, 4.1 Hz, 1H), 2.27 (s, 3H), 2.17 (brs, 1H), 0.97 (t, *J* = 7.1 Hz, 3H) ppm. <sup>13</sup>C NMR (100 MHz, CDCl<sub>3</sub>) δ 180.7 (CO<sub>2</sub>Et), 140.7, 133.2, 127.5, 127.3, 119.3, 57.5 (CH<sub>2</sub>CH<sub>3</sub>), 37.6 (NCH<sub>3</sub>), 35.0 (ArCH<sub>2</sub>-), 20.3 (Ph-CH<sub>3</sub>), 13.3 (CH<sub>2</sub>CH<sub>3</sub>) ppm.

##### (3-(4-(*tert*-Butyl)phenyl)-1-ethoxy-1-oxopropan-2-yl)(1,3-dimethyl-1*H*-imidazol-3-ium-2-yl)dihydroborate (3c)

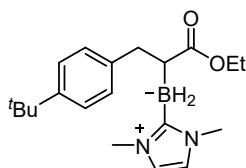

Yellow oil (93%, 94.2 mg).  $^1\text{H}$  NMR (400 MHz,  $\text{CDCl}_3$ )  $\delta$  7.22 (d,  $J = 8.3$  Hz, 2H), 7.13 (d,  $J = 8.3$  Hz, 2H), 6.79 (s, 2H), 3.87-3.77 (m, 2H), 3.72 (s, 6H), 3.11 (dd,  $J = 14.3, 10.2$  Hz, 1H), 2.68 (dd,  $J = 14.3, 4.4$  Hz, 1H), 2.19 (brs, 1H), 1.27 (s, 9H), 0.98 (t,  $J = 7.1$  Hz, 3H) ppm.  $^{13}\text{C}$  NMR (100 MHz,  $\text{CDCl}_3$ )  $\delta$  180.7 ( $\text{CO}_2\text{Et}$ ), 146.5, 140.7, 127.0, 123.7, 119.3, 57.5 ( $\text{CH}_2\text{CH}_3$ ), 37.5 ( $\text{NCH}_3$ ), 35.0 ( $\text{ArCH}_2-$ ), 33.2 ( $\text{C}(\text{CH}_3)_3$ ), 30.4 ( $\text{C}(\text{CH}_3)_3$ ), 13.3 ( $\text{CH}_2\text{CH}_3$ ) ppm. HRMS (ESI) ( $m/z$ ): calculated for  $\text{C}_{20}\text{H}_{31}\text{BN}_2\text{NaO}_2^+$  [ $\text{M} + \text{Na}$ ] $^+$  365.2376; found, 365.2379.

**(1,3-Dimethyl-1*H*-imidazol-3-ium-2-yl)(1-ethoxy-3-(4-methoxyphenyl)-1-oxopropan-2-yl)dihydroborate<sup>7</sup> (3d)**

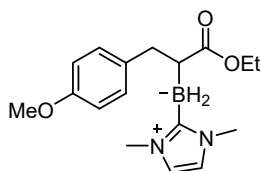

Yellow oil (92%, 87.0 mg).  $^1\text{H}$  NMR (400 MHz,  $\text{CDCl}_3$ )  $\delta$  7.14-7.12 (m, 2H), 6.81 (s, 2H), 6.77-6.73 (m, 2H), 3.85-3.78 (m, 2H), 3.75 (s, 3H), 3.74 (s, 6H), 3.05 (dd,  $J = 14.3, 10.2$  Hz, 1H), 2.66 (dd,  $J = 14.3, 4.2$  Hz, 1H), 2.15 (brs, 1H), 0.98 (t,  $J = 8.0$  Hz, 3H) ppm.  $^{13}\text{C}$  NMR (100 MHz,  $\text{CDCl}_3$ )  $\delta$  180.7 ( $\text{CO}_2\text{Et}$ ), 156.1, 136.1, 128.3, 119.3, 112.2, 57.5 ( $\text{CH}_2\text{CH}_3$ ), 54.2 ( $\text{OCH}_3$ ), 37.7 ( $\text{NCH}_3$ ), 35.0 ( $\text{ArCH}_2-$ ), 13.3 ( $\text{CH}_2\text{CH}_3$ ) ppm.

**(1,3-Dimethyl-1*H*-imidazol-3-ium-2-yl)(1-ethoxy-3-(4-hydroxyphenyl)-1-oxopropan-2-yl)dihydroborate (3e)**

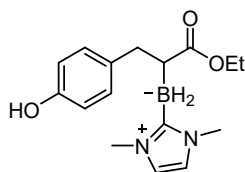

Yellow oil (45%, 40.8 mg).  $^1\text{H}$  NMR (400 MHz,  $\text{CDCl}_3$ )  $\delta$  6.99 (d,  $J = 8.4$  Hz, 2H), 6.77 (s, 2H), 6.59 (d,  $J = 8.4$  Hz, 2H), 3.84 (q,  $J = 7.1$  Hz, 2H), 3.7 (s, 6H), 3.03-2.96 (m, 1H), 2.65-2.61 (m, 1H), 2.20 (brs, 1H), 1.01 (t,  $J = 7.1$  Hz, 3H) ppm.  $^{13}\text{C}$  NMR (100 MHz,  $\text{CDCl}_3$ )  $\delta$  181.6 ( $\text{CO}_2\text{Et}$ ), 152.7, 135.2, 128.3, 119.4, 113.8, 57.9 ( $\text{CH}_2\text{CH}_3$ ), 37.1 ( $\text{NCH}_3$ ), 35.0 ( $\text{ArCH}_2-$ ), 13.3 ( $\text{CH}_2\text{CH}_3$ ) ppm. HRMS (ESI) ( $m/z$ ): calculated for  $\text{C}_{16}\text{H}_{23}\text{BN}_2\text{NaO}_3^+$  [ $\text{M} + \text{Na}$ ] $^+$  325.1708; found, 325.1702.

**(1,3-Dimethyl-1*H*-imidazol-3-ium-2-yl)(1-ethoxy-3-(4-fluorophenyl)-1-oxopropan-2-yl)dihydroborate<sup>8</sup> (3f)**

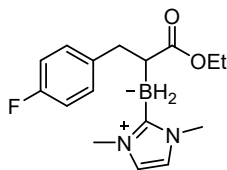

Yellow oil (92%, 86.3 mg). <sup>1</sup>H NMR (400 MHz, CDCl<sub>3</sub>) δ 7.18-7.13 (m, 2H), 6.90-6.85 (m, 2H), 6.82 (s, 2H), 3.84-3.76 (m, 2H), 3.74 (s, 6H), 3.07 (dd, *J* = 14.3, 10.3 Hz, 1H), 2.69 (dd, *J* = 14.3, 4.3 Hz, 1H), 2.14 (brs, 1H), 0.97 (t, *J* = 7.1 Hz, 3H) ppm. <sup>13</sup>C NMR (100 MHz, CDCl<sub>3</sub>) δ 180.4 (CO<sub>2</sub>Et), 159.8 (d, *J*<sub>CF</sub> = 240.0 Hz), 139.5, 128.8 (d, *J*<sub>CF</sub> = 8.0 Hz), 119.4, 113.4 (d, *J*<sub>CF</sub> = 21.0 Hz), 57.5 (CH<sub>2</sub>CH<sub>3</sub>), 37.3 (NCH<sub>3</sub>), 35.9 (ArCH<sub>2</sub>-), 13.3 (CH<sub>2</sub>CH<sub>3</sub>) ppm. <sup>19</sup>F NMR (376 MHz, CDCl<sub>3</sub>) δ -119.2 (s, 1F) ppm.

**(1,3-Dimethyl-1*H*-imidazol-3-ium-2-yl)(1-ethoxy-3-(2-fluorophenyl)-1-oxopropan-2-yl)dihydroborate (3g)**

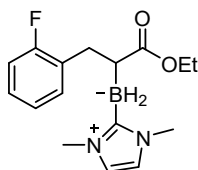

Yellow oil (91%, 82.7 mg). <sup>1</sup>H NMR (400 MHz, CDCl<sub>3</sub>) δ 7.47-7.27 (m, 4H), 6.82 (s, 2H), 3.86-3.77 (m, 2H), 3.74 (s, 6H), 3.16 (dd, *J* = 14.3 Hz, 10.2 Hz, 1H), 2.78 (dd, *J* = 14.3, 4.4 Hz, 1H), 2.18 (brs, 1H), 0.98 (t, *J* = 7.1 Hz, 3H) ppm. <sup>13</sup>C NMR (100 MHz, CDCl<sub>3</sub>) δ 180.2 (CO<sub>2</sub>Et), 160.2 (d, *J*<sub>CF</sub> = 242.1 Hz), 130.0 (d, *J*<sub>CF</sub> = 5.6 Hz), 125.5 (d, *J*<sub>CF</sub> = 8.1 Hz), 122.3 (d, *J*<sub>CF</sub> = 3.4 Hz), 119.4, 113.4 (d, *J*<sub>CF</sub> = 22.5 Hz), 57.7 (CH<sub>2</sub>CH<sub>3</sub>), 37.9 (NCH<sub>3</sub>), 35.0 (ArCH<sub>2</sub>-), 13.2 (CH<sub>2</sub>CH<sub>3</sub>) ppm. <sup>19</sup>F NMR (376 MHz, CDCl<sub>3</sub>) δ -118.7 (s, 1F) ppm. HRMS (ESI) (*m/z*): calculated for C<sub>16</sub>H<sub>22</sub>BFKN<sub>2</sub>O<sub>2</sub><sup>+</sup> [M + K]<sup>+</sup> 343.1395; found, 343.1356.

**(3-(4-Chlorophenyl)-1-ethoxy-1-oxopropan-2-yl)(1,3-dimethyl-1*H*-imidazol-3-ium-2-yl)dihydroborate<sup>7</sup> (3h)**

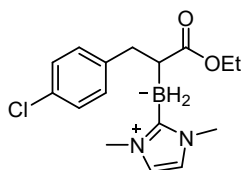

Yellow oil (92%, 88.6 mg).  $^1\text{H}$  NMR (400 MHz,  $\text{CDCl}_3$ )  $\delta$  7.17-7.13 (m, 4H), 6.82 (s, 2H), 3.84-3.76 (m, 2H), 3.74 (s, 6H), 3.06 (dd,  $J = 14.3, 10.3$  Hz, 1H), 2.69 (dd,  $J = 14.3, 4.3$  Hz, 1H), 2.14 (brs, 1H), 0.97 (t,  $J = 7.1$  Hz, 3H) ppm.  $^{13}\text{C}$  NMR (100 MHz,  $\text{CDCl}_3$ )  $\delta$  180.3 ( $\text{CO}_2\text{Et}$ ), 142.3, 129.5, 128.9, 126.8, 119.3, 57.6 ( $\text{CH}_2\text{CH}_3$ ), 37.8 ( $\text{NCH}_3$ ), 35.0 ( $\text{ArCH}_2^-$ ), 13.3 ( $\text{CH}_2\text{CH}_3$ ) ppm.

**(3-(2-Chlorophenyl)-1-ethoxy-1-oxopropan-2-yl)(1,3-dimethyl-1H-imidazol-3-ium-2-yl)dihydroborate (3i)**

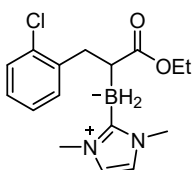

Yellow oil (90%, 86.2 mg).  $^1\text{H}$  NMR (400 MHz,  $\text{CDCl}_3$ )  $\delta$  7.33 (dd,  $J = 7.5, 1.8$  Hz, 1H), 7.27-7.24 (m, 1H), 7.12-7.02 (m, 2H), 6.83 (s, 2H), 3.85 (q,  $J = 7.1$  Hz, 2H), 3.78 (s, 6H), 3.13 (dd,  $J = 14.3, 10.6$  Hz, 1H), 2.84 (dd,  $J = 14.3, 3.5$  Hz, 1H), 1.01 (t,  $J = 7.1$  Hz, 3H) ppm.  $^{13}\text{C}$  NMR (100 MHz,  $\text{CDCl}_3$ )  $\delta$  180.3 ( $\text{CO}_2\text{Et}$ ), 141.0, 132.9, 129.9, 128.0, 125.5, 125.2, 119.3, 57.6 ( $\text{CH}_2\text{CH}_3$ ), 35.6 ( $\text{NCH}_3$ ), 35.0 ( $\text{ArCH}_2^-$ ), 13.3 ( $\text{CH}_2\text{CH}_3$ ) ppm. HRMS (ESI) ( $m/z$ ): calculated for  $\text{C}_{16}\text{H}_{22}\text{BClN}_2\text{NaO}_2^+$  [ $\text{M} + \text{Na}$ ] $^+$  343.1361; found, 343.1367.

**(3-(4-Bromophenyl)-1-ethoxy-1-oxopropan-2-yl)(1,3-dimethyl-1H-imidazol-3-ium-2-yl)dihydroborate (3j)**

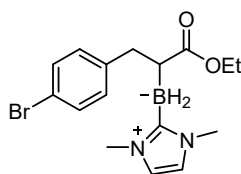

Yellow oil (76%, 83.1 mg).  $^1\text{H}$  NMR (400 MHz,  $\text{CDCl}_3$ )  $\delta$  7.31 (d,  $J = 8.3$  Hz, 2H), 7.09 (d,  $J = 8.3$  Hz, 2H), 6.82 (s, 2H), 3.85-3.76 (m, 2H), 3.74 (s, 6H), 3.05 (dd,  $J = 14.3, 10.3$  Hz, 1H), 2.67 (dd,  $J = 14.3, 4.3$  Hz, 1H), 2.13 (brs, 1H), 0.97 (t,  $J = 7.1$  Hz, 3H) ppm.  $^{13}\text{C}$  NMR (100MHz,  $\text{CDCl}_3$ )  $\delta$  180.8 ( $\text{CO}_2\text{Et}$ ), 142.9, 129.8, 129.4, 119.4, 117.6, 58.0 ( $\text{CH}_2\text{CH}_3$ ), 37.5 ( $\text{NCH}_3$ ), 35.0 ( $\text{ArCH}_2^-$ ), 13.3 ( $\text{CH}_2\text{CH}_3$ ) ppm. HRMS (ESI) ( $m/z$ ): calculated for  $\text{C}_{16}\text{H}_{22}\text{BBrN}_2\text{NaO}_2^+$  [ $\text{M} + \text{Na}$ ] $^+$  387.0855; found, 387.0844.

**(3-(4-Cyanophenyl)-1-ethoxy-1-oxopropan-2-yl)(1,3-dimethyl-1*H*-imidazol-3-ium-2-yl)dihydroborate<sup>7</sup> (3k)**

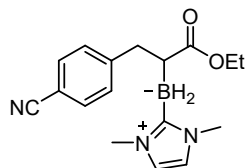

Yellow oil (68%, 63.5 mg). <sup>1</sup>H NMR (400 MHz, CDCl<sub>3</sub>) δ 7.49 (d, *J* = 8.3 Hz, 2H), 7.32 (d, *J* = 8.2 Hz, 2H), 6.84 (s, 2H), 3.82-3.72 (m, 2H), 3.75 (s, 6H), 3.15 (dd, *J* = 14.4, 10.3 Hz, 1H), 2.78 (dd, *J* = 14.4, 4.3 Hz, 1H), 2.16 (brs, 1H), 0.95 (t, *J* = 7.1 Hz, 3H) ppm. <sup>13</sup>C NMR (100 MHz, CDCl<sub>3</sub>) δ 179.9 (CO<sub>2</sub>Et), 149.8, 130.7, 128.4, 119.4, 118.6, 107.7, 56.9 (CH<sub>2</sub>CH<sub>3</sub>), 37.9 (NCH<sub>3</sub>), 35.0 (ArCH<sub>2</sub>-), 13.3 (CH<sub>2</sub>CH<sub>3</sub>) ppm.

**(1,3-Dimethyl-1*H*-imidazol-3-ium-2-yl)(1-ethoxy-1-oxo-3-(3-(trifluoromethyl)phenyl)propan-2-yl)dihydroborate (3l)**

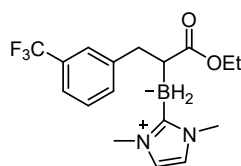

Yellow oil (65%, 69.1 mg). <sup>1</sup>H NMR (400 MHz, CDCl<sub>3</sub>) δ 7.46-7.27 (m, 4H), 6.82 (s, 2H), 3.86-3.77 (m, 2H), 3.74 (s, 6H), 3.16 (dd, *J* = 14.3, 10.2 Hz, 1H), 2.78 (dd, *J* = 14.3, 4.4 Hz, 1H), 2.18 (brs, 1H), 0.98 (t, *J* = 7.1 Hz, 3H) ppm. <sup>13</sup>C NMR (100 MHz, CDCl<sub>3</sub>) δ 181.1 (CO<sub>2</sub>Et), 145.6, 132.1, 129.9 (q, *J*<sub>CF</sub> = 31.5 Hz), 128.1, 125.1 (q, *J*<sub>CF</sub> = 3.7 Hz), 124.5 (q, *J*<sub>CF</sub> = 270.5 Hz, CF<sub>3</sub>), 121.8 (q, *J*<sub>CF</sub> = 3.8 Hz), 120.4, 58.6 (CH<sub>2</sub>CH<sub>3</sub>), 38.9 (NCH<sub>3</sub>), 36.0 (ArCH<sub>2</sub>-), 14.2 (CH<sub>2</sub>CH<sub>3</sub>) ppm. <sup>19</sup>F NMR (376 MHz, CDCl<sub>3</sub>) δ -62.4 (s, 3F) ppm. HRMS (ESI) (*m/z*): calculated for C<sub>17</sub>H<sub>22</sub>BF<sub>3</sub>N<sub>2</sub>NaO<sub>2</sub><sup>+</sup> [M + Na]<sup>+</sup> 377.1624; found, 377.1623.

**(3-(4-(Benzyloxy)-3-methoxyphenyl)-1-ethoxy-1-oxopropan-2-yl)(1,3-dimethyl-1*H*-imidazol-3-ium-2-yl)dihydroborate<sup>7</sup> (3m)**

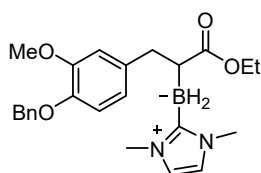

Yellow oil (89%, 117.0 mg).  $^1\text{H}$  NMR (400 MHz,  $\text{CDCl}_3$ )  $\delta$  7.42 (d,  $J = 7.5$  Hz, 2H), 7.34 (t,  $J = 7.3$  Hz, 2H), 7.27 (t,  $J = 7.0$  Hz, 1H), 6.80 (s, 1H), 6.78 (s, 2H), 6.73 (d,  $J = 8.2$  Hz, 1H), 6.67 (d,  $J = 8.2$  Hz, 1H), 5.09 (s, 2H), 3.88-3.76 (m, 5H), 3.72 (s, 6H), 3.05 (dd,  $J = 14.4, 10.2$  Hz, 1H), 2.65 (dd,  $J = 14.4, 4.3$  Hz, 1H), 2.15 (brs, 1H), 0.98 (t,  $J = 7.1$  Hz, 3H) ppm.  $^{13}\text{C}$  NMR (100 MHz,  $\text{CDCl}_3$ )  $\delta$  180.7 ( $\text{CO}_2\text{Et}$ ), 148.1, 144.7, 137.5, 136.7, 127.4, 126.6, 126.3, 119.3, 119.2, 113.0, 111.6, 69.8 ( $\text{OCH}_2\text{Ph}$ ), 57.5 ( $\text{CH}_2\text{CH}_3$ ), 54.1 ( $\text{OCH}_3$ ), 37.7 ( $\text{NCH}_3$ ), 35.4 ( $\text{ArCH}_2$ -), 13.4 ( $\text{CH}_2\text{CH}_3$ ) ppm.

**(1,3-Dimethyl-1*H*-imidazol-3-ium-2-yl)(1-ethoxy-3-(4-hydroxy-3-methoxyphenyl)-1-oxopropan-2-yl)dihydroborate (3n)**

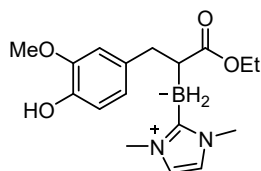

Yellow oil (68%, 71.1 mg).  $^1\text{H}$  NMR (400 MHz,  $\text{CDCl}_3$ )  $\delta$  6.80 (s, 2H), 6.76-6.66 (m, 3H), 3.86-3.76 (m, 5H), 3.73 (s, 6H), 3.04 (dd,  $J = 14.4, 10.3$  Hz, 1H), 2.64 (dd,  $J = 14.3, 4.1$  Hz, 1H), 2.15 (brs, 1H), 0.98 (t,  $J = 7.1$  Hz, 3H) ppm.  $^{13}\text{C}$  NMR (100MHz,  $\text{CDCl}_3$ )  $\delta$  180.7 ( $\text{CO}_2\text{Et}$ ), 144.9, 142.0, 136.0, 119.8, 119.3, 112.7, 110.4, 57.5 ( $\text{CH}_2\text{CH}_3$ ), 54.8 ( $\text{OCH}_3$ ), 37.8 ( $\text{NCH}_3$ ), 35.0 ( $\text{ArCH}_2$ -), 13.3 ( $\text{CH}_2\text{CH}_3$ ) ppm. HRMS (ESI) ( $m/z$ ): calculated for  $\text{C}_{17}\text{H}_{25}\text{BN}_2\text{NaO}_4^+$  [ $\text{M} + \text{Na}$ ] + 355.1805; found, 355.1800.

**(1,3-Dimethyl-1*H*-imidazol-3-ium-2-yl)(1-ethoxy-3-(naphthalen-2-yl)-1-oxopropan-2-yl)dihydroborate<sup>8</sup> (3o)**

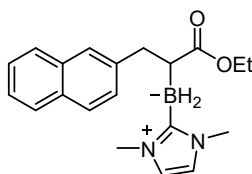

White solid (96%, 96.9 mg).  $^1\text{H}$  NMR (400 MHz,  $\text{CDCl}_3$ )  $\delta$  7.74 (t,  $J = 7.0$  Hz, 2H), 7.68 (d,  $J = 8.4$  Hz, 1H), 7.64 (s, 1H), 7.40-7.33 (m, 3H), 6.74 (s, 2H), 3.83-3.74 (m, 2H), 3.72 (s, 6H), 3.27 (dd,  $J = 14.3, 10.2$  Hz, 1H), 2.88 (dd,  $J = 14.4, 4.2$  Hz, 1H), 2.29 (brs, 1H), 0.95 (t,  $J = 7.1$  Hz, 3H) ppm.  $^{13}\text{C}$  NMR (100 MHz,  $\text{CDCl}_3$ )  $\delta$  180.5 ( $\text{CO}_2\text{Et}$ ), 141.4, 132.6, 130.7, 127.0, 126.4, 126.4, 126.2, 125.2, 124.4, 123.5, 119.3, 57.5 ( $\text{CH}_2\text{CH}_3$ ), 38.3 ( $\text{NCH}_3$ ), 35.0 ( $\text{ArCH}_2$ -), 13.3 ( $\text{CH}_2\text{CH}_3$ ) ppm.



**(1,3-Dimethyl-1*H*-imidazol-3-ium-2-yl)(1-ethoxy-1-oxo-3-(pyridin-3-yl)propan-2-yl)dihydroborate<sup>7</sup> (3p)**

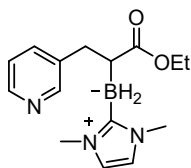

Yellow oil (63%, 54.3 mg). <sup>1</sup>H NMR (400 MHz, CDCl<sub>3</sub>) δ 8.41 (d, *J* = 45.6 Hz, 2H), 7.55 (d, *J* = 7.8 Hz, 1H), 7.14 (dd, *J* = 7.8, 4.7 Hz, 1H), 6.84 (s, 2H), 3.84-3.76 (m, 2H), 3.74 (s, 6H), 3.12-3.06 (m, 1H), 2.75-2.70 (m, 1H), 2.15 (s, 1H), 0.97 (t, *J* = 7.1 Hz, 3H) ppm. <sup>13</sup>C NMR (100 MHz, CDCl<sub>3</sub>) δ 180.1 (CO<sub>2</sub>Et), 149.1, 145.5, 138.9, 135.1, 121.9, 119.5, 57.6 (CH<sub>2</sub>CH<sub>3</sub>), 35.2, 35.0, 13.3 (CH<sub>2</sub>CH<sub>3</sub>) ppm.

**(1,3-Dimethyl-1*H*-imidazol-3-ium-2-yl)(1-methoxy-1-oxo-3-(thiophen-2-yl)propan-2-yl)dihydroborate<sup>7</sup> (3q)**

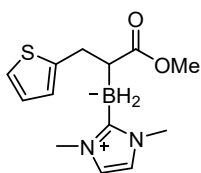

Yellow oil (36%, 30.0 mg). <sup>1</sup>H NMR (400 MHz, CDCl<sub>3</sub>) δ 7.01 (d, *J* = 5.1 Hz, 1H), 6.84 (dd, *J* = 5.1, 3.4 Hz, 1H), 6.82 (s, 2H), 6.75 (d, *J* = 3.4 Hz, 1H), 3.75 (s, 6H), 3.43 (s, 3H), 3.31 (dd, *J* = 15.3, 11.1 Hz, 1H), 2.90 (dd, *J* = 15.3, 3.9 Hz, 1H), 2.20 (brs, 1H) ppm. <sup>13</sup>C NMR (100 MHz, CDCl<sub>3</sub>) δ 181.5 (CO<sub>2</sub>Me), 148.0, 126.3, 123.5, 122.2, 120.4, 50.5 (CO<sub>2</sub>Me), 36.0 (NCH<sub>3</sub>), 33.3 (ArCH<sub>2</sub>-) ppm. HRMS (ESI) (*m/z*): calculated for C<sub>13</sub>H<sub>19</sub>BN<sub>2</sub>NaO<sub>2</sub>S<sup>+</sup> [M + Na]<sup>+</sup> 301.1153; found, 301.1122.

**(1,3-Dimethyl-1*H*-imidazol-3-ium-2-yl)(1-methoxy-1-oxo-3-phenylpropan-2-yl)dihydroborate<sup>7</sup> (3r)**

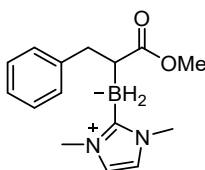

Yellow oil (93%, 76.0 mg). <sup>1</sup>H NMR (400 MHz, CDCl<sub>3</sub>) δ 7.20-7.19 (m, 4H), 7.12-7.05 (m, 1H), 6.80 (s, 2H), 3.72 (s, 6H), 3.37 (s, 3H), 3.11 (dd, *J* = 14.3, 10.1 Hz, 1H),

2.71 (dd,  $J = 14.3, 4.3$  Hz, 1H), 2.20 (brs, 1H) ppm.  $^{13}\text{C}$  NMR (100 MHz,  $\text{CDCl}_3$ )  $\delta$  180.9 ( $\text{CO}_2\text{Me}$ ), 143.7, 127.4, 126.9, 124.0, 119.4, 49.3 ( $\text{CO}_2\text{Me}$ ), 38.1 ( $\text{NCH}_3$ ), 35.0 ( $\text{ArCH}_2$ -) ppm.

**(1,3-Dimethyl-1*H*-imidazol-3-ium-2-yl)(1-methoxy-1-oxo-3-(*p*-tolyl)propan-2-yl) dihydroborate<sup>7</sup> (3s)**

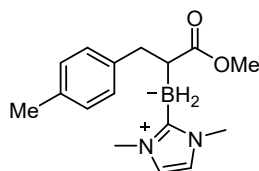

Yellow oil (91%, 78.2 mg).  $^1\text{H}$  NMR (400 MHz,  $\text{CDCl}_3$ )  $\delta$  7.08 (d,  $J = 7.9$  Hz, 2H), 7.00 (d,  $J = 7.8$  Hz, 2H), 6.80 (s, 2H), 3.73 (s, 6H), 3.37 (s, 3H), 3.07 (dd,  $J = 14.3, 10.3$  Hz, 1H), 2.66 (dd,  $J = 14.3, 4.2$  Hz, 1H), 2.27 (s, 3H), 2.18 (brs, 1H) ppm.  $^{13}\text{C}$  NMR (100 MHz,  $\text{CDCl}_3$ )  $\delta$  180.9 ( $\text{CO}_2\text{Me}$ ), 140.6, 133.2, 127.6, 127.3, 119.4, 49.3 ( $\text{CO}_2\text{Me}$ ), 37.6 ( $\text{NCH}_3$ ), 35.0 ( $\text{ArCH}_2$ -), 20.0 ( $\text{Ph-CH}_3$ ) ppm.

**(1,3-Dimethyl-1*H*-imidazol-3-ium-2-yl)(1-oxo-3-phenyl-1-propoxypropan-2-yl) dihydroborate<sup>7</sup> (3t)**

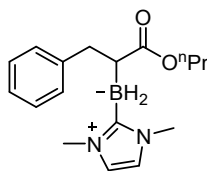

Yellow oil (90%, 81.1 mg).  $^1\text{H}$  NMR (400 MHz,  $\text{CDCl}_3$ )  $\delta$  7.22-7.19 (m, 4H), 7.10-7.06 (m, 1H), 6.79 (s, 2H), 3.80-3.76 (m, 1H), 3.73 (s, 6H), 3.69-3.63 (m, 1H), 3.12 (dd,  $J = 14.3, 10.2$  Hz, 1H), 2.72 (dd,  $J = 14.3, 4.3$  Hz, 1H), 2.20 (brs, 1H), 1.41-1.36 (m, 2H), 0.76 (t,  $J = 7.4$  Hz, 3H) ppm.  $^{13}\text{C}$  NMR (100 MHz,  $\text{CDCl}_3$ )  $\delta$  180.6 ( $\text{CO}_2^{\text{nPr}}$ ), 143.8, 127.5, 126.8, 123.9, 119.3, 63.4 ( $\text{CO}_2\text{CH}_2\text{CH}_2\text{CH}_3$ ), 38.1 ( $\text{NCH}_3$ ), 35.0 ( $\text{PhCH}_2$ -), 21.1 ( $\text{CO}_2\text{CH}_2\text{CH}_2\text{CH}_3$ ), 9.4 ( $\text{CO}_2\text{CH}_2\text{CH}_2\text{CH}_3$ ) ppm.

**(1,3-Dimethyl-1*H*-imidazol-3-ium-2-yl)(1-isopropoxy-1-oxo-3-phenylpropan-2-yl) dihydroborate<sup>7</sup> (3u)**

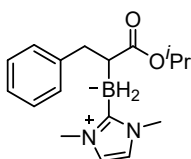

Yellow oil (79%, 71.2 mg).  $^1\text{H}$  NMR (400 MHz,  $\text{CDCl}_3$ )  $\delta$  7.22-7.19 (m, 4H), 7.10-7.05 (m, 1H), 6.79 (s, 2H), 4.75-4.65 (m, 1H), 3.74 (s, 6H), 3.14-3.08 (m, 1H), 2.74-2.69 (m, 1H), 2.18 (brs, 1H), 1.01 (d,  $J = 6.2$  Hz, 3H), 0.87 (d,  $J = 6.3$  Hz, 3H) ppm.  $^{13}\text{C}$  NMR (100 MHz,  $\text{CDCl}_3$ )  $\delta$  180.2 ( $\text{CO}_2^i\text{Pr}$ ), 143.9, 127.5, 126.7, 123.9, 119.3, 64.0 ( $\text{CO}_2\text{CH}(\text{CH}_3)_2$ ), 38.2 ( $\text{NCH}_3$ ), 35.0 ( $\text{PhCH}_2^-$ ), 21.1 ( $\text{CO}_2\text{CH}(\text{CH}_3)_2$ ), 20.7 ( $\text{CO}_2\text{CH}(\text{CH}_3)_2$ ) ppm.

**(1-Butoxy-1-oxo-3-phenylpropan-2-yl)(1,3-dimethyl-1*H*-imidazol-3-ium-2-yl)dihydroborate<sup>7</sup> (3v)**

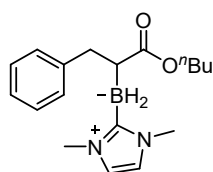

Yellow oil (96%, 89.9 mg).  $^1\text{H}$  NMR (400 MHz,  $\text{CDCl}_3$ )  $\delta$  7.20-7.19 (m, 4H), 7.12-7.06 (m, 1H), 6.80 (s, 2H), 3.85-3.79 (m, 1H), 3.73 (s, 6H), 3.72-3.69 (m, 1H), 3.11 (dd,  $J = 14.4, 10.2$  Hz, 1H), 2.72 (dd,  $J = 14.4, 4.3$  Hz, 1H), 2.20 (brs, 1H), 1.37-1.33 (m, 2H), 1.23-1.13 (m, 2H), 0.82 (t,  $J = 7.3$  Hz, 3H) ppm.  $^{13}\text{C}$  NMR (100 MHz,  $\text{CDCl}_3$ )  $\delta$  180.7 ( $\text{CO}_2^i\text{Bu}$ ), 143.8, 127.5, 126.8, 123.9, 119.3, 61.6 ( $\text{CO}_2\text{CH}_2\text{CH}_2\text{CH}_2\text{CH}_3$ ), 38.1 ( $\text{NCH}_3$ ), 35.0 ( $\text{PhCH}_2^-$ ), 30.3 ( $\text{CO}_2\text{CH}_2\text{CH}_2\text{CH}_2\text{CH}_3$ ), 18.7 ( $\text{CO}_2\text{CH}_2\text{CH}_2\text{CH}_2\text{CH}_3$ ), 12.8 ( $\text{CO}_2\text{CH}_2\text{CH}_2\text{CH}_2\text{CH}_3$ ) ppm.

**(1-(Benzyloxy)-1-oxo-3-phenylpropan-2-yl)(1,3-dimethyl-1*H*-imidazol-3-ium-2-yl)dihydroborat<sup>7</sup> (3w)**

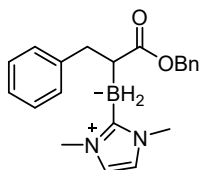

Yellow oil (35%, 36.6 mg).  $^1\text{H}$  NMR (400 MHz,  $\text{CDCl}_3$ )  $\delta$  7.26-7.18 (m, 7H), 7.14-7.07 (m, 3H), 6.67 (s, 2H), 4.9-4.8 (m, 2H), 3.62 (s, 6H), 3.15-3.08 (m, 1H), 2.76 (m, 1H), 2.28 (brs, 1H) ppm.  $^{13}\text{C}$  NMR (100 MHz,  $\text{CDCl}_3$ )  $\delta$  180.3 ( $\text{CO}_2\text{CH}_2\text{Ph}$ ), 143.7, 136.3, 127.5, 127.2, 126.9, 126.9, 126.4, 124.0, 119.2, 63.5 ( $\text{CO}_2\text{CH}_2\text{Ph}$ ), 38.2 ( $\text{NCH}_3$ ), 34.9 ( $\text{PhCH}_2^-$ ) ppm.

**(1,3-Dimethyl-1*H*-imidazol-3-ium-2-yl)(1-oxo-1-phenethoxy-3-phenylpropan-2-yl)dihydroborate (3x)**

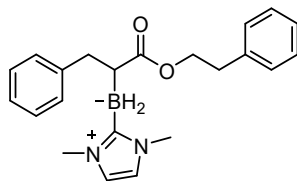

White solid (92%, 100.0 mg). <sup>1</sup>H NMR (400 MHz, CDCl<sub>3</sub>) δ 7.26-7.17 (m, 7H), 7.12 - 7.07 (m, 3H), 6.73 (s, 2H), 4.11-4.05 (m, 1H), 3.88-3.82 (m, 1H), 3.66 (s, 6H), 3.15-3.08 (m, 1H), 2.75-2.64 (m, 3H), 2.20 (brs, 1H) ppm. <sup>13</sup>C NMR (100 MHz, CDCl<sub>3</sub>) δ 180.5 (CO<sub>2</sub>CH<sub>2</sub>CH<sub>2</sub>Ph), 143.7, 137.6, 127.9, 127.5, 127.3, 126.8, 125.2, 124.0, 119.3, 62.6 (CO<sub>2</sub>CH<sub>2</sub>CH<sub>2</sub>Ph), 38.1 (NCH<sub>3</sub>), 34.9, 34.3 ppm. HRMS (ESI) (m/z): calculated for C<sub>22</sub>H<sub>27</sub>BN<sub>2</sub>NaO<sub>2</sub><sup>+</sup> [M + Na]<sup>+</sup> 385.2058; found, 385.2062.

**(1-(Cinnamyloxy)-1-oxo-3-phenylpropan-2-yl)(1,3-dimethyl-1*H*-imidazol-3-ium-2-yl)dihydroborate<sup>7</sup> (3y)**

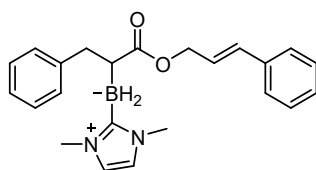

Yellow oil (69%, 77.5 mg). <sup>1</sup>H NMR (400 MHz, CDCl<sub>3</sub>) δ 7.37-7.27 (m, 5H), 7.24-7.17 (m, 5H), 7.10-7.07 (m, 1H), 6.69 (s, 2H), 6.41 (d, *J* = 15.9 Hz, 1H), 6.04-5.97 (m, 1H), 4.46-4.40 (m, 2H), 3.69 (s, 6H), 3.15 (m, 1H), 2.75 (m, 1H), 2.26 (s, 1H) ppm. <sup>13</sup>C NMR (100 MHz, CDCl<sub>3</sub>) δ 180.2 (CO<sub>2</sub>R), 143.7, 135.5, 131.5, 127.5, 126.9, 126.7, 125.4, 124.0, 123.7, 119.3, 62.2 (CO<sub>2</sub>CH<sub>2</sub>-), 38.1 (NCH<sub>3</sub>), 35.0 (PhCH<sub>2</sub>-) ppm.

**(1,3-Dimethyl-1*H*-imidazol-3-ium-2-yl)(2-oxochroman-3-yl)dihydroborate<sup>7</sup> (3z)**

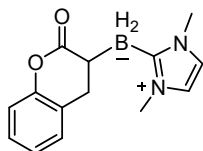

White solid (96%, 73.7 mg). <sup>1</sup>H NMR (400 MHz, CDCl<sub>3</sub>) δ 7.17-7.12 (m, 2H), 7.0 (t, *J* = 7.4 Hz, 1H), 6.91 (d, *J* = 8.0 Hz, 1H), 6.79 (s, 2H), 3.69 (s, 6H), 3.25 (s, 1H), 2.76-2.73 (m, 1H), 2.38 (brs, 1H) ppm. <sup>13</sup>C NMR (100 MHz, CDCl<sub>3</sub>) δ 177.0 (CO<sub>2</sub>R), 151.3, 127.4, 125.8, 123.5, 122.3, 119.0, 114.1, 35.6 (NCH<sub>3</sub>), 29.6 (PhCH<sub>2</sub>-) ppm.

**(1,3-Dimethyl-1*H*-imidazol-3-ium-2-yl)(6-methyl-2-oxochroman-3-yl)dihydroborate<sup>7</sup> (3aa)**

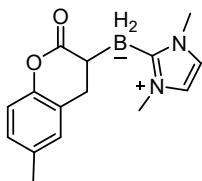

White solid (96%, 77.8 mg). <sup>1</sup>H NMR (400 MHz, CDCl<sub>3</sub>) δ 6.97-6.93 (m, 2H), 6.82 (s, 1H), 6.79 (s, 2H), 3.69 (s, 6H), 3.23-3.21 (m, 1H), 2.72-2.68 (m, 1H), 2.36 (brs, 1H), 2.30 (s, 3H) ppm. <sup>13</sup>C NMR (100 MHz, CDCl<sub>3</sub>) δ 177.5 (CO<sub>2</sub>R), 149.2, 131.6, 128.0, 126.2, 122.6, 119.6, 114.1, 35.0 (NCH<sub>3</sub>), 29.6 (PhCH<sub>2</sub>-), 19.8 (PhCH<sub>3</sub>) ppm.

**(1,3-Dimethyl-1*H*-imidazol-3-ium-2-yl)(1-ethoxy-1-oxo-3-phenylbutan-2-yl)dihydroborate (3ab)**

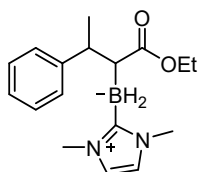

Yellow oil (79%, 71.1 mg). <sup>1</sup>H NMR (400 MHz, CDCl<sub>3</sub>) δ 7.25-7.17 (m, 4H), 7.08-7.04 (m, 1H), 6.80 (s, 2H), 3.76 (s, 6H), 3.55-3.50 (m, 2H), 3.13-3.08 (dd, *J* = 10.5, 7.0 Hz, 1H), 2.15 (brs, 1H), 1.33 (d, *J* = 7.0 Hz, 3H), 0.74 (t, *J* = 7.1 Hz, 3H) ppm. <sup>13</sup>C NMR (100 MHz, CDCl<sub>3</sub>) δ 180.9 (CO<sub>2</sub>Et), 150.6, 127.7, 127.0, 124.9, 120.3, 58.1 (CH<sub>2</sub>CH<sub>3</sub>), 43.2, 35.9, 22.1, 14.0 (CH<sub>2</sub>CH<sub>3</sub>) ppm. HRMS (ESI) (*m/z*): calculated for C<sub>17</sub>H<sub>25</sub>BN<sub>2</sub>O<sub>2</sub>Na<sup>+</sup> [*M* + Na]<sup>+</sup> 323.1901; found, 323.1907.

**(2-Cyano-3-ethoxy-3-oxo-1,1-diphenylpropyl)(1,3-dimethyl-1*H*-imidazol-3-ium-2-yl)dihydroborate<sup>7</sup> (3ac)**

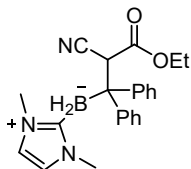

Yellow oil (96%, 111.6 mg). <sup>1</sup>H NMR (400 MHz, CDCl<sub>3</sub>) δ 7.59 (d, *J* = 7.3 Hz, 2H), 7.50 (d, *J* = 7.1 Hz, 2H), 7.28-7.09 (m, 6H), 6.81 (s, 2H), 4.70 (s, 1H), 3.93-3.77 (m, 2H), 3.64 (s, 6H), 0.89 (t, *J* = 7.1 Hz, 3H) ppm. <sup>13</sup>C NMR (100 MHz, CDCl<sub>3</sub>) δ 174.3

(CO<sub>2</sub>Et), 144.5, 141.9, 130.6, 128.2, 127.9, 127.6, 126.4, 126.0, 125.3, 121.4, 60.6 (CHCO<sub>2</sub>Et), 55.7 (CH<sub>2</sub>CH<sub>3</sub>), 36.7 (NCH<sub>3</sub>), 13.8 (CH<sub>2</sub>CH<sub>3</sub>) ppm.

**(1,4-Diethoxy-1,4-dioxobutan-2-yl)(1,3-dimethyl-1*H*-imidazol-3-ium-2-yl)dihydroborate (3ad)**

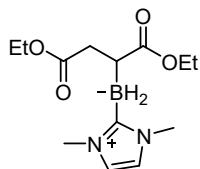

Yellow oil (36%, 30.4 mg). <sup>1</sup>H NMR (400 MHz, CDCl<sub>3</sub>) δ 6.85 (s, 2H), 4.08 (q, *J* = 7.2 Hz, 2H), 3.95-3.83 (m, 2H), 3.76 (m, 6H), 2.85-2.78 (dd, *J* = 17.0, 10.2 Hz, 1H), 2.39 (dd, *J* = 17.0, 4.7 Hz, 1H), 2.24 (brs, 1H), 1.22 (t, *J* = 7.1 Hz, 3H), 1.05 (t, *J* = 7.2 Hz, 3H) ppm. <sup>13</sup>C NMR (100 MHz, CDCl<sub>3</sub>) δ 181.2 (CO<sub>2</sub>Et), 175.1 (CO<sub>2</sub>Et), 120.3, 59.8 (CH<sub>2</sub>CH<sub>3</sub>), 58.7 (CH<sub>2</sub>CH<sub>3</sub>), 37.5 (NCH<sub>3</sub>), 35.9 (NCH<sub>3</sub>), 14.3 (CH<sub>2</sub>CH<sub>3</sub>), 14.2 (CH<sub>2</sub>CH<sub>3</sub>) ppm. HRMS (ESI) (*m/z*): calculated for C<sub>13</sub>H<sub>23</sub>BN<sub>2</sub>O<sub>4</sub>Na<sup>+</sup> [*M* + Na]<sup>+</sup> 305.1643; found, 305.1647.

**(1,3-Dimethyl-1*H*-imidazol-3-ium-2-yl)(3-oxo-1-phenylbutan-2-yl)dihydroborate<sup>7</sup> (3ae)**

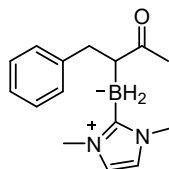

Yellow oil (44%, 33.8 mg). <sup>1</sup>H NMR (400 MHz, CDCl<sub>3</sub>) δ 7.18 (d, *J* = 7.5 Hz, 2H), 7.13-7.07 (m, 3H), 6.79 (s, 2H), 3.71 (s, 6H), 3.10 (dd, *J* = 14.5, 9.7 Hz, 1H), 2.65 (dd, *J* = 14.4, 4.6 Hz, 1H), 2.58 (brs, 1H), 2.00 (s, 3H) ppm. <sup>13</sup>C NMR (100 MHz, CDCl<sub>3</sub>) δ 217.4 (COMe), 144.3, 128.2, 127.9, 125.0, 120.6, 38.2, 36.1, 28.2 (COMe) ppm. HRMS (ESI) (*m/z*): calculated for C<sub>15</sub>H<sub>21</sub>BN<sub>2</sub>O<sub>2</sub>Na<sup>+</sup> [*M* + Na]<sup>+</sup> 279.1639; found, 279.1621.

**(1-(4-Bromophenyl)-3-oxobutan-2-yl)(1,3-dimethyl-1*H*-imidazol-3-ium-2-yl)dihydroborate (3af)**

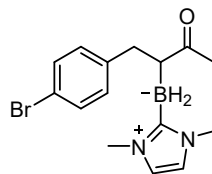

Yellow oil (61%, 61.2 mg).  $^1\text{H}$  NMR (400 MHz,  $\text{CDCl}_3$ )  $\delta$  7.29 (d,  $J = 8.4$  Hz, 2H), 7.00 (d,  $J = 8.4$  Hz, 2H), 6.82 (s, 2H), 3.71 (s, 6H), 3.02 (dd,  $J = 14.6, 9.9$  Hz, 1H), 2.60-2.55 (m, 1H), 2.53 (brs, 1H), 1.97 (s, 3H) ppm.  $^{13}\text{C}$  NMR (100 MHz,  $\text{CDCl}_3$ )  $\delta$  217.0 (COMe), 143.4, 130.8, 130.1, 120.6, 118.6, 37.6, 36.1, 28.4 (COMe) ppm. HRMS (ESI) (m/z): calculated for  $\text{C}_{15}\text{H}_{21}\text{BBrN}_2\text{O}^+$   $[\text{M} + \text{H}]^+$  335.0925; found, 335.0927.

**(1,3-Dimethyl-1*H*-imidazol-3-ium-2-yl)(1-(4-methoxyphenyl)-3-oxobutan-2-yl)dihydroborate (3ag)**

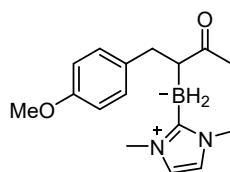

Yellow oil (82%, 70.4 mg).  $^1\text{H}$  NMR (400 MHz,  $\text{CDCl}_3$ )  $\delta$  7.04 (d,  $J = 8.6$  Hz, 2H), 6.81 (s, 2H), 6.73 (d,  $J = 8.6$  Hz, 2H), 3.74 (s, 3H), 3.71 (s, 6H), 3.02 (dd,  $J = 14.7, 10.0$  Hz, 1H), 2.61-2.56 (m, 1H), 2.54 (brs, 1H), 2.00 (s, 3H) ppm.  $^{13}\text{C}$  NMR (100 MHz,  $\text{CDCl}_3$ )  $\delta$  217.6 (COMe), 157.1, 136.5, 129.0, 120.5, 113.3, 55.1 ( $\text{OCH}_3$ ), 37.3, 36.0, 28.2 (COMe) ppm. HRMS (ESI) (m/z): calculated for  $\text{C}_{16}\text{H}_{24}\text{BN}_2\text{O}_2^+$   $[\text{M} + \text{H}]^+$  287.1925; found, 287.1940.

**(3-(4-Chlorophenyl)-1-oxo-1-phenylpropan-2-yl)(1,3-dimethyl-1*H*-imidazol-3-ium-2-yl)dihydroborate (3ah)**

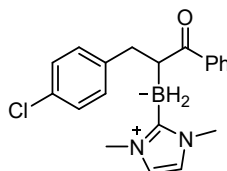

Yellow oil (30%, 31.5 mg).  $^1\text{H}$  NMR (400 MHz,  $\text{CDCl}_3$ )  $\delta$  7.73 (d,  $J = 8.6$  Hz, 2H), 7.35 (t,  $J = 7.3$  Hz, 1H), 7.26-7.24 (m, 2H), 7.14-7.12 (m, 4H), 6.63 (s, 2H), 3.56 (s, 6H), 3.47 (brs, 1H), 3.32 (dd,  $J = 14.0, 9.4$  Hz, 1H), 2.79 (dd,  $J = 13.9, 3.5$  Hz, 1H) ppm.  $^{13}\text{C}$  NMR (100 MHz,  $\text{CDCl}_3$ )  $\delta$  139.2, 131.1, 130.5, 130.0, 128.6, 127.9, 127.8, 127.4, 120.4, 38.0, 36.1 ppm.

**(1-Carboxy-2-phenylethyl)(1,3-dimethyl-1*H*-imidazol-3-ium-2-yl)dihydroborate<sup>8</sup>**  
**(3ai)**

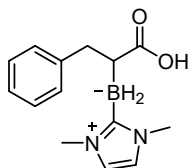

Yellow oil (91%, 70.5 mg). <sup>1</sup>H NMR (400 MHz, CDCl<sub>3</sub>) δ 7.22-7.19 (m, 4H), 7.13-7.09 (m, 1H), 6.68 (s, 2H), 3.63 (s, 6H), 3.07-3.01 (m, 1H), 2.75-2.70 (m, 1H), 2.17 (brs, 1H) ppm. <sup>13</sup>C NMR (100 MHz, CDCl<sub>3</sub>) δ 187.2 (COOH), 143.7, 127.6, 126.8, 124.0, 119.4, 37.6 (NCH<sub>3</sub>), 34.8 (PhCH<sub>2</sub>-) ppm.

**(1-Amino-1-oxo-3-phenylpropan-2-yl)(1,3-dimethyl-1*H*-imidazol-3-ium-2-yl)dihydroborate<sup>7</sup>** **(3aj)**

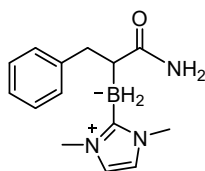

Yellow oil (46%, 35.5 mg). <sup>1</sup>H NMR (400 MHz, CDCl<sub>3</sub>) δ 7.21-7.20 (m, 4H), 7.13-7.08 (m, 1H), 6.78 (s, 2H), 5.24 (s, 2H), 3.74 (s, 6H), 2.97 (dd, *J* = 14.3, 10.1 Hz, 1H), 2.76 (dd, *J* = 14.4, 4.9 Hz, 1H), 2.12 (brs, 1H) ppm. <sup>13</sup>C NMR (100MHz, CDCl<sub>3</sub>) δ 184.3 (CONH<sub>2</sub>), 142.7, 127.3, 127.0, 124.2, 119.5, 39.1 (NCH<sub>3</sub>), 35.2 (PhCH<sub>2</sub>-) ppm.

**(1-Cyano-2-phenylethyl)(1,3-dimethyl-1*H*-imidazol-3-ium-2-yl)dihydroborate<sup>7</sup>**  
**(3ak)**

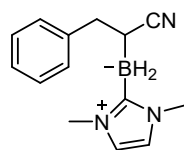

Yellow oil (75%, 53.8 mg). <sup>1</sup>H NMR (400 MHz, CDCl<sub>3</sub>) δ 7.29-7.28 (m, 4H), 7.21-7.16 (m, 1H), 6.86 (s, 2H), 3.84 (s, 6H), 2.90-2.78 (m, 2H), 1.87 (brs, 1H) ppm. <sup>13</sup>C NMR (100 MHz, CDCl<sub>3</sub>) δ 141.5, 128.0, 127.5, 127.2, 124.9, 119.9, 39.0 (NCH<sub>3</sub>), 35.4 (PhCH<sub>2</sub>-) ppm.

**(1-Cyano-2-(4-fluorophenyl)ethyl)(1,3-dimethyl-1*H*-imidazol-3-ium-2-yl)dihydroborate<sup>7</sup>** **(3al)**



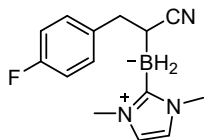

Yellow oil (87%, 67.0 mg).  $^1\text{H}$  NMR (400 MHz,  $\text{CDCl}_3$ )  $\delta$  7.23 (dd,  $J = 8.6, 5.5$  Hz, 2H), 6.96 (t,  $J = 8.8$  Hz, 2H), 6.87 (s, 2H), 3.84 (s, 6H), 2.86-2.74 (m, 2H), 1.83 (brs, 1H) ppm.  $^{13}\text{C}$  NMR (100 MHz,  $\text{CDCl}_3$ )  $\delta$  161.3 (d,  $J_{\text{CF}} = 241.4$  Hz), 138.1, 129.8 (d,  $J_{\text{CF}} = 7.6$  Hz), 128.8, 120.8, 114.8 (d,  $J_{\text{CF}} = 20.8$  Hz), 39.1 ( $\text{NCH}_3$ ), 36.3 ( $\text{PhCH}_2$ -) ppm.  $^{19}\text{F}$  NMR (376 MHz,  $\text{CDCl}_3$ )  $\delta$  -117.8 (s, 1F) ppm.

**(Z)-1-(1,3-Dimethyl-1*H*-imidazol-3-ium-2-yl)(1-((3,7-dimethylocta-2,6-dien-1-yl)oxy)-1-oxo-3-phenylpropan-2-yl)dihydroborate (3am)**

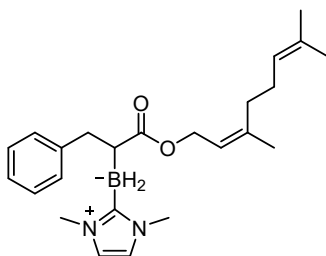

Yellow oil (76%, 89.6 mg).  $^1\text{H}$  NMR (400 MHz,  $\text{CDCl}_3$ )  $\delta$  7.21-7.16 (m, 4H), 7.09-7.06 (m, 1H), 6.77 (s, 2H), 5.04-5.00 (m, 2H), 4.30-4.28 (d,  $J = 6.8$  Hz, 2H), 3.71 (s, 6H), 3.12 (dd,  $J = 14.2, 10.1$  Hz, 1H), 2.72 (dd,  $J = 14.3, 4.2$  Hz, 1H), 2.19 (brs, 1H), 2.00 (s, 4H), 1.68 (s, 3H), 1.66 (s, 3H), 1.57 (s, 3H) ppm.  $^{13}\text{C}$  NMR (100 MHz,  $\text{CDCl}_3$ )  $\delta$  181.4, 144.7, 140.4, 131.8, 128.5, 127.7, 124.9, 123.7, 120.5, 120.2, 59.4, 39.1, 35.9, 32.0, 26.6, 25.6, 23.4, 17.6 ppm. HRMS (ESI) ( $m/z$ ): calculated for  $\text{C}_{24}\text{H}_{35}\text{BN}_2\text{O}_2\text{Na}^+$  [ $\text{M} + \text{Na}$ ] $^+$  417.2684; found, 417.2698.

**(1,3-Dimethyl-1*H*-imidazol-3-ium-2-yl)(1-(((8*R*,9*S*,13*S*,14*S*)-13-methyl-17-oxo-7,8,9,11,12,13,14,15,16,17-decahydro-6*H*-cyclopenta[*a*]phenanthren-3-yl)oxy)-1-oxo-3-phenylpropan-2-yl)dihydroborate (3an)**

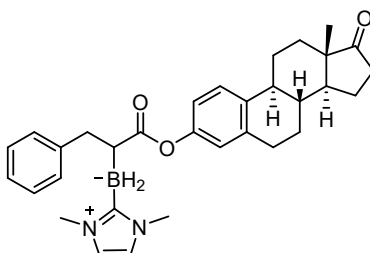

Yellow oil (85%, 129.8 mg).  $^1\text{H}$  NMR (400 MHz,  $\text{CDCl}_3$ )  $\delta$  7.28-7.25 (m, 2H), 7.24-7.20 (m, 2H), 7.15-7.10 (m, 2H), 6.82 (s, 2H), 6.47-6.44 (m, 2H), 3.76 (s, 6H), 3.21 (dd,  $J = 14.3, 10.6$  Hz, 1H), 2.83-2.80 (m, 3H), 2.52-2.33 (m, 3H), 2.14-1.91 (m, 5H), 1.60-1.39 (m, 7H), 0.88 (s, 3H) ppm.  $^{13}\text{C}$  NMR (100 MHz,  $\text{CDCl}_3$ )  $\delta$  180.1, 149.4, 144.4, 137.3, 136.0, 128.5, 127.8, 125.8, 125.1, 121.7, 120.4, 118.7, 50.3, 47.8, 44.0, 39.2, 37.9, 36.1, 35.8, 31.5, 29.3, 26.3, 25.6, 21.5, 13.7 ppm. HRMS (ESI) ( $m/z$ ): calculated for  $\text{C}_{32}\text{H}_{40}\text{BN}_2\text{O}_3^+$  [ $\text{M} + \text{H}$ ] $^+$  511.3127; found, 511.3142.

## 5. Reference

- [1] S. Gardner, T. Kawammoto and D. P. Curran, *J. Org. Chem.*, 2015, **80**, 9794–9797.
- [2] J. Teske and B. Plietker, *ACS Catal.*, 2016, **6**, 7148–7151.
- [3] Y.-S. Huang, J. Wang, W.-X. Zheng, F.-L. Zhang, Y.-J. Yu, M. Zheng, X. Zhou, Y.-F. Wang, *Chem. Commun.*, 2019, **55**, 11904–11907.
- [4] M. A. Cismesia and T. P. Yoon, *Chem. Sci.*, 2015, **6**, 5426–5434.
- [5] J.-Y. Tao, Y.-X. Wang, Q.-H. Zhang, K. Ni, T.-H. Zhu and K. Zhao, *Green Chem.*, 2022, **24**, 4004–4011.
- [6] D. Wang, C. Muck-Lichtenfeld and A. Studer, *J. Am. Chem. Soc.*, 2019, **141**, 14126–14130.
- [7] G. S. Li, G. W. Huang, R. X. Sun, D. P. Curran and W. Dai, *Org. Lett.*, 2021, **23**, 4353–4357.
- [8] S. C. Ren, F. L. Zhang, A. Q. Xu, Y. N. Yang, M. Zheng, X. G. Zhou, Y. Fu and Y. F. Wang, *Nat. Commun.*, 2019, **10**, 1934.

## 6. $^1\text{H}$ NMR, $^{13}\text{C}$ NMR and $^{19}\text{F}$ NMR spectra

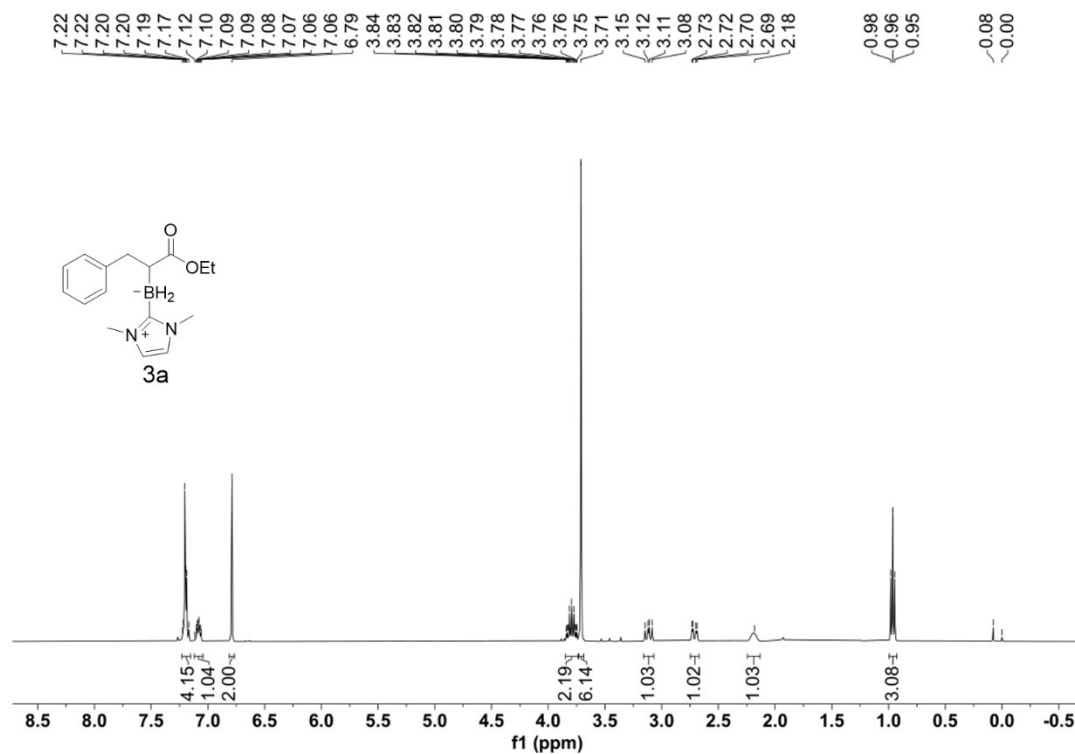

**Fig. S3**  $^1\text{H}$  NMR (400 MHz,  $\text{CDCl}_3$ ) spectrum for **3a**.

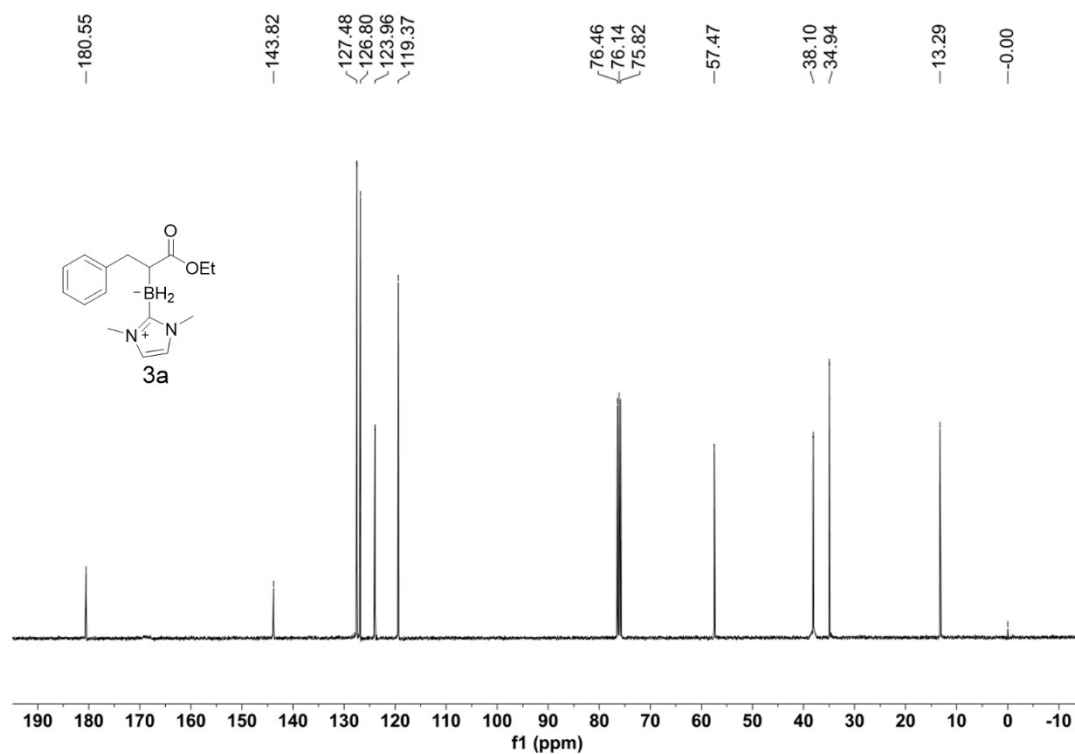

**Fig. S4**  $^{13}\text{C}$  NMR (100 MHz,  $\text{CDCl}_3$ ) spectrum for **3a**.

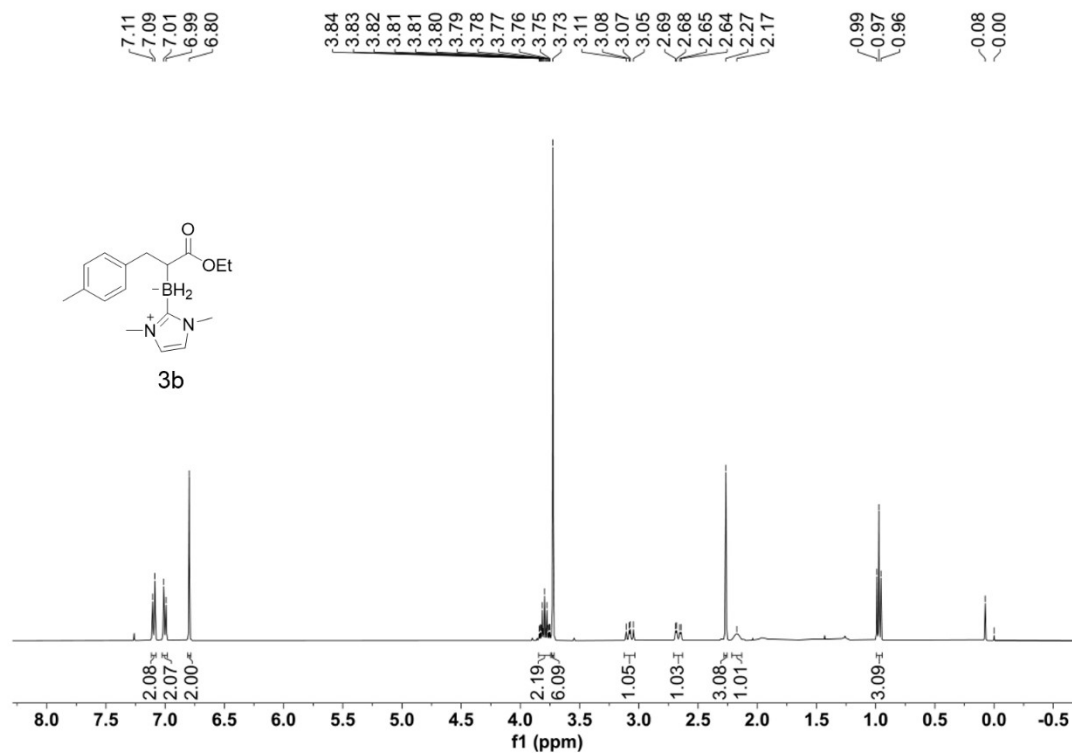

Fig. S5 <sup>1</sup>H NMR (400 MHz, CDCl<sub>3</sub>) spectrum for **3b**.

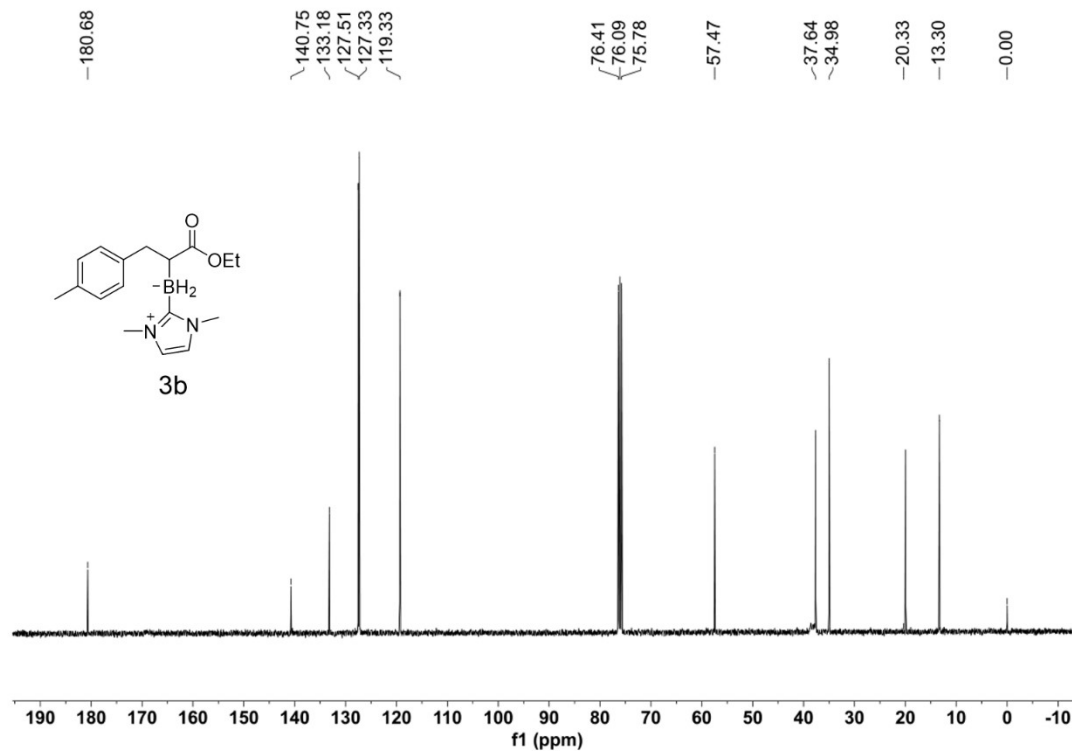

Fig. S6 <sup>13</sup>C NMR (100 MHz, CDCl<sub>3</sub>) spectrum for **3b**.

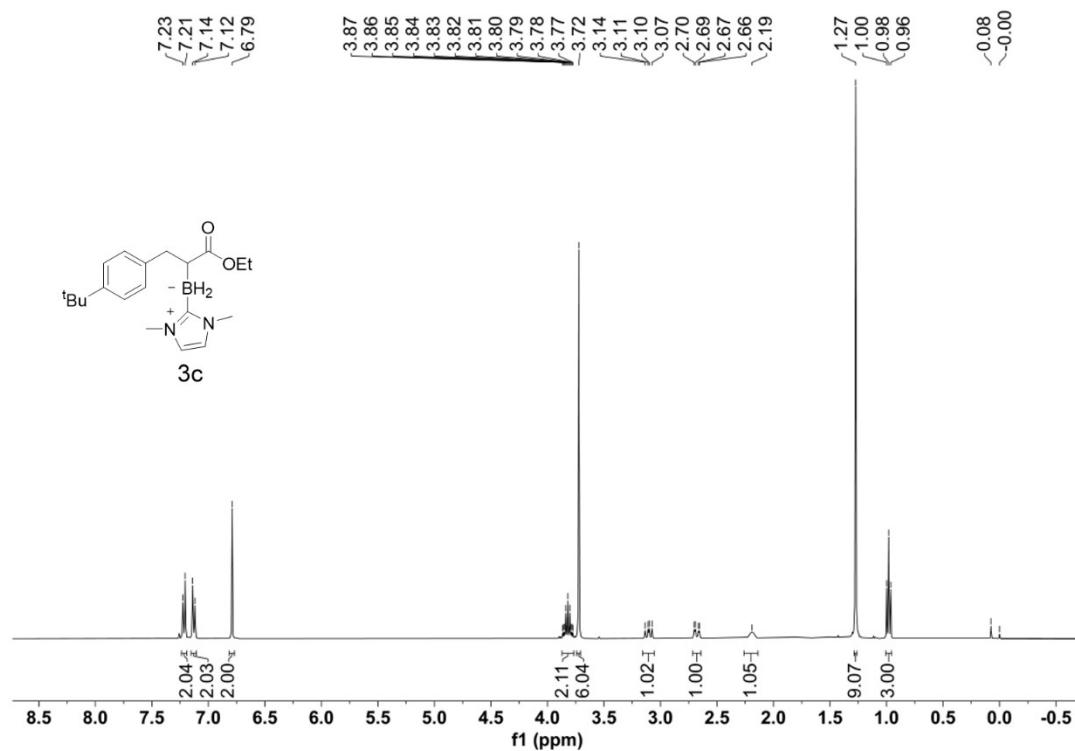

**Fig. S7** <sup>1</sup>H NMR (400 MHz, CDCl<sub>3</sub>) spectrum for **3c**.

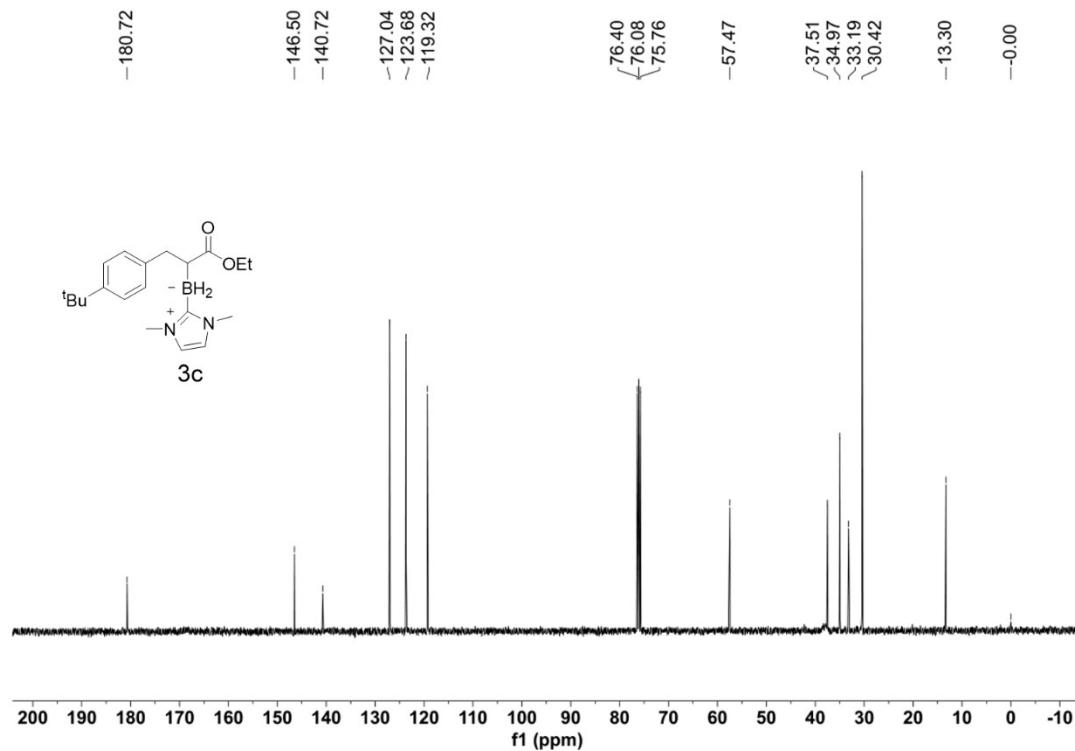

**Fig. S8** <sup>13</sup>C NMR (100 MHz, CDCl<sub>3</sub>) spectrum for **3c**.

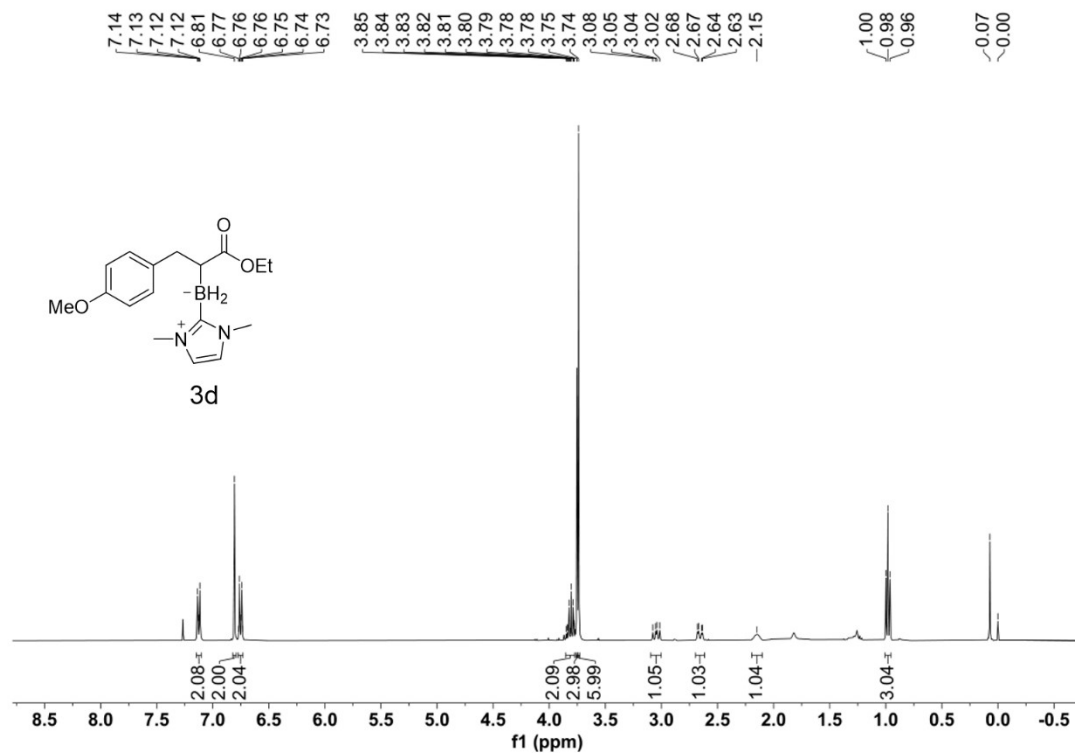

**Fig. S9**  $^1\text{H}$  NMR (400 MHz,  $\text{CDCl}_3$ ) spectrum for **3d**.

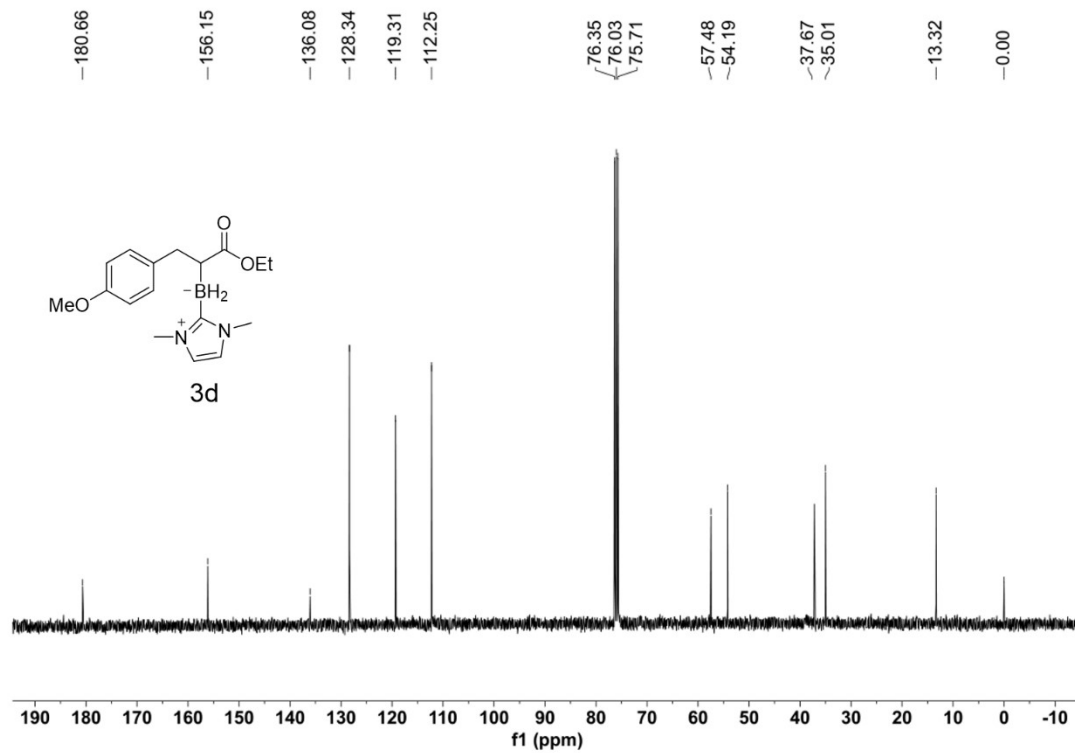

**Fig. S10**  $^{13}\text{C}$  NMR (100 MHz,  $\text{CDCl}_3$ ) spectrum for **3d**.

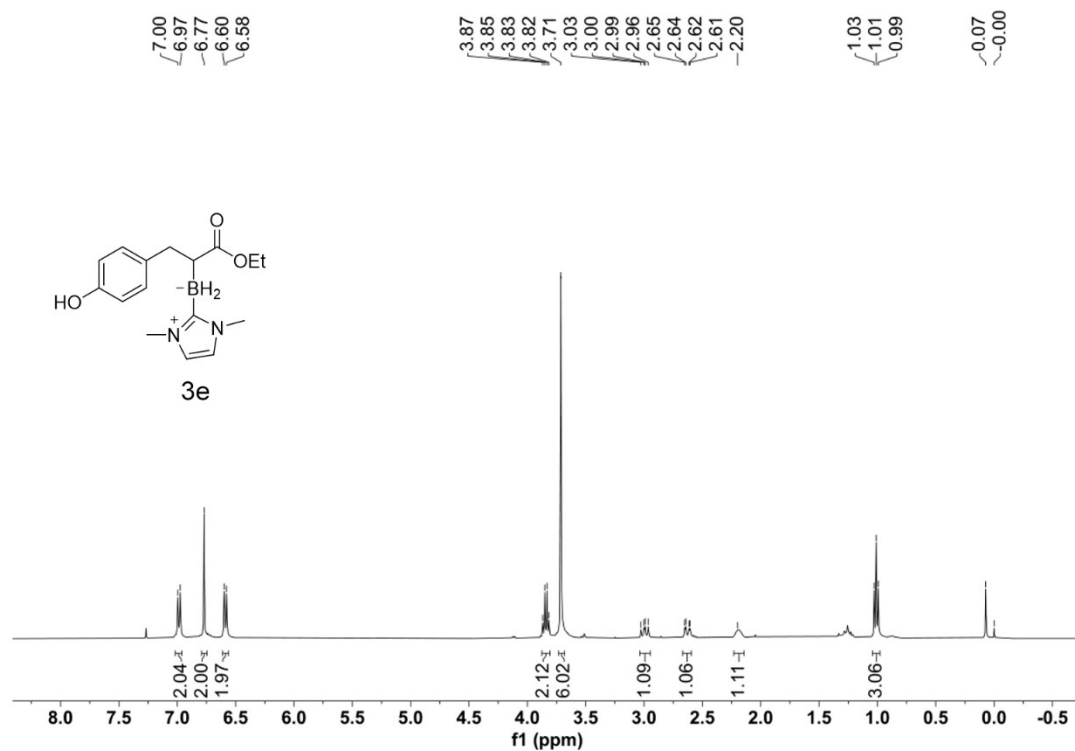

**Fig. S11** <sup>1</sup>H NMR (400 MHz, CDCl<sub>3</sub>) spectrum for **3e**.

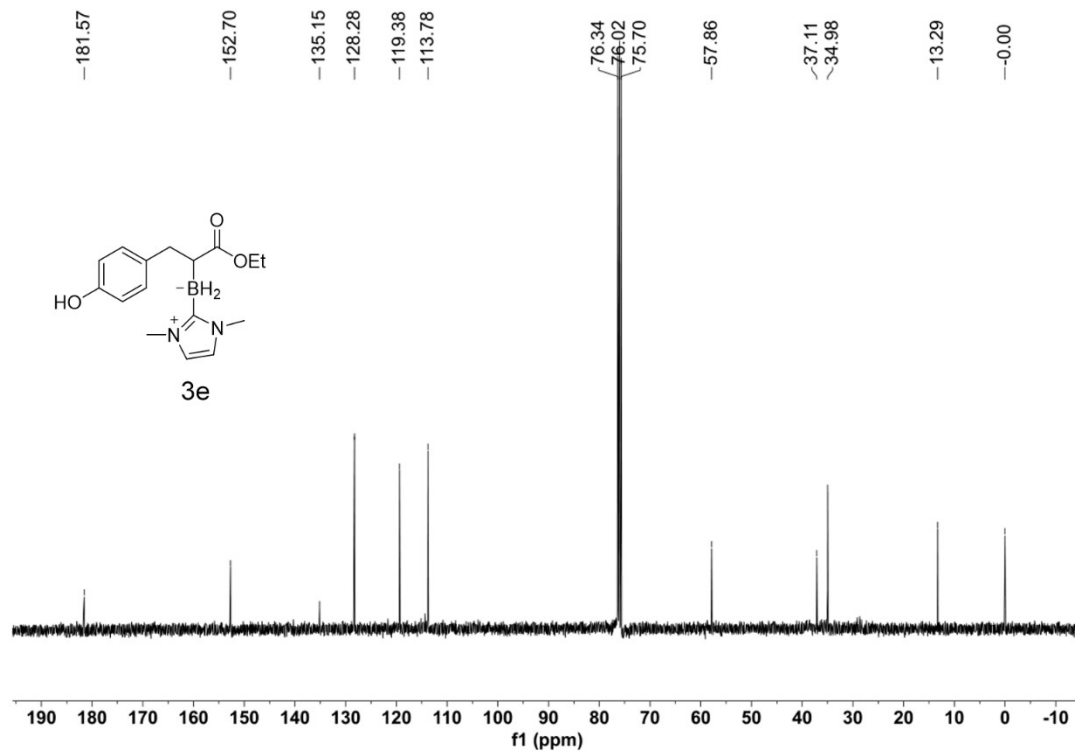

**Fig. S12** <sup>13</sup>C NMR (100 MHz, CDCl<sub>3</sub>) spectrum for **3e**.

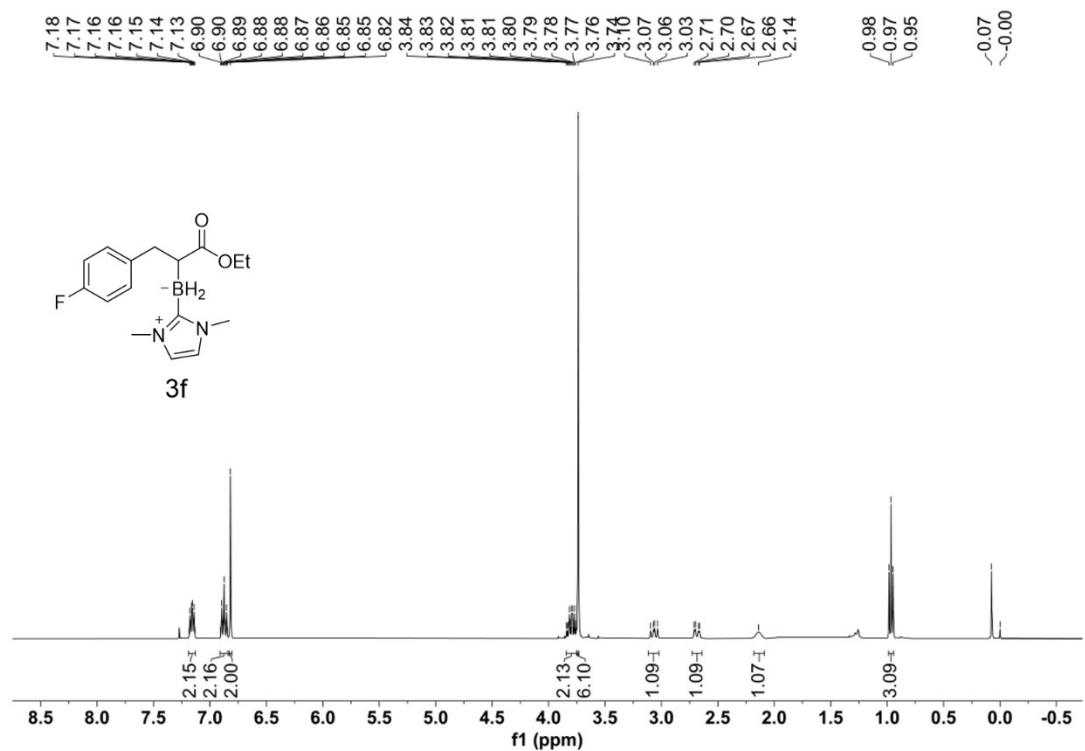

**Fig. S13** <sup>1</sup>H NMR (400 MHz, CDCl<sub>3</sub>) spectrum for **3f**.

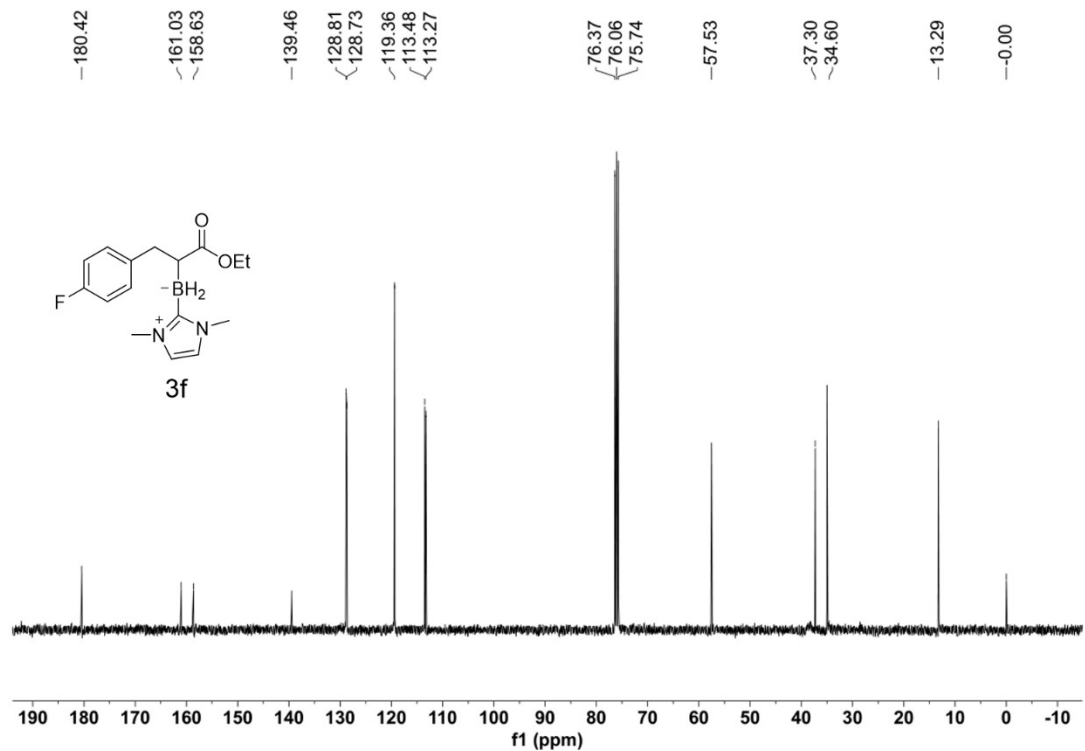

**Fig. S14** <sup>13</sup>C NMR (100 MHz, CDCl<sub>3</sub>) spectrum for **3f**.



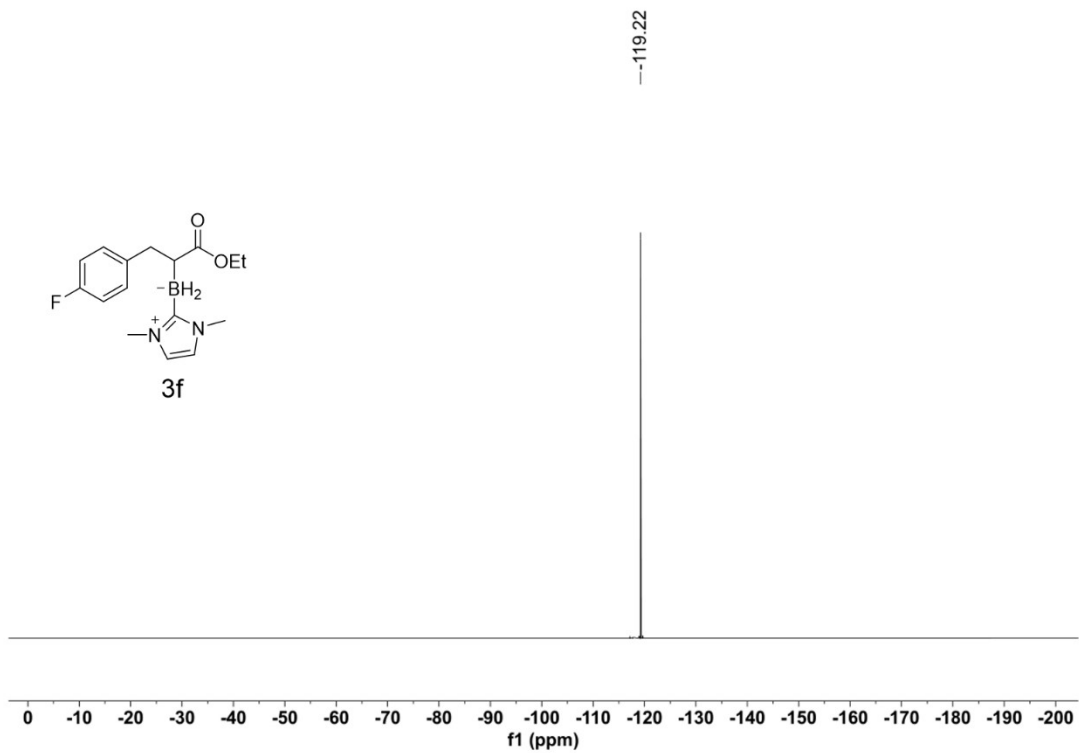

**Fig. S15**  $^{19}\text{F}$  NMR (376 MHz,  $\text{CDCl}_3$ ) spectrum for **3f**.

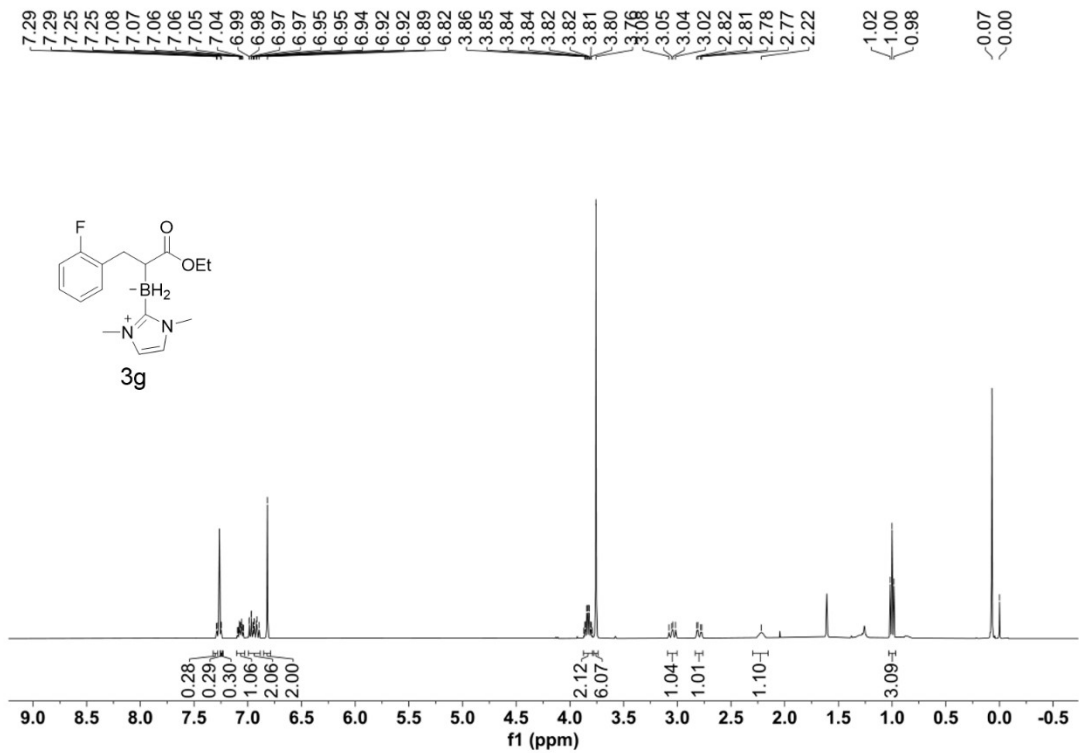

**Fig. S16**  $^1\text{H}$  NMR (400 MHz,  $\text{CDCl}_3$ ) spectrum for **3g**.

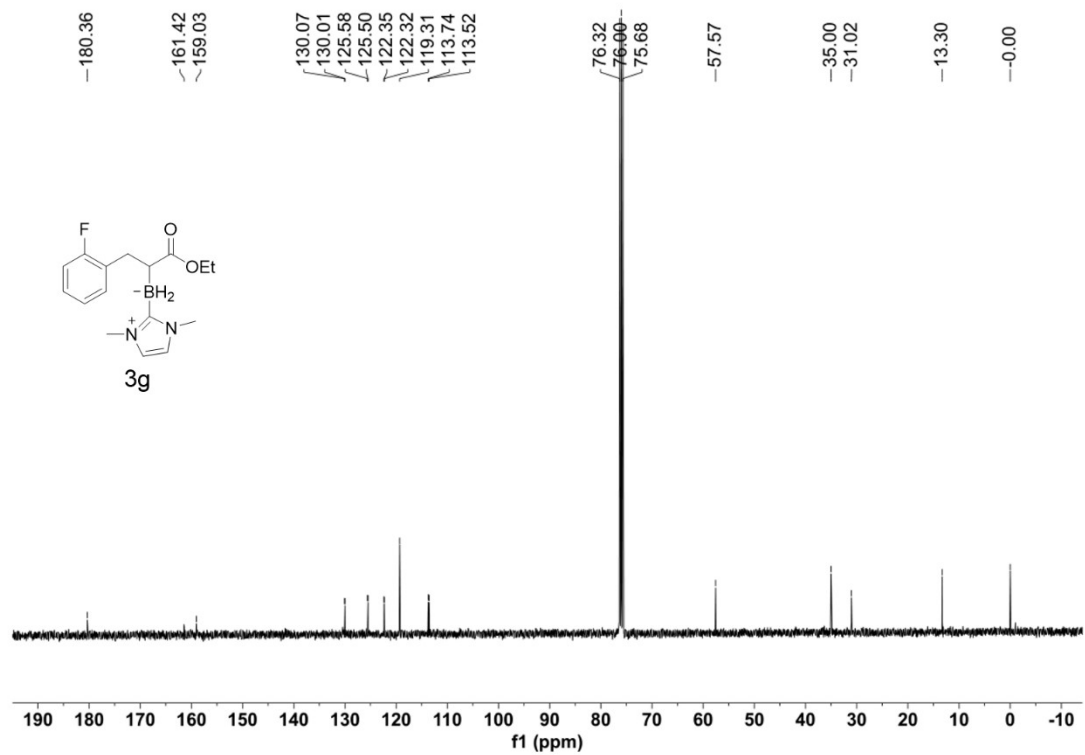

**Fig. S17** <sup>13</sup>C NMR (100 MHz, CDCl<sub>3</sub>) spectrum for **3g**.

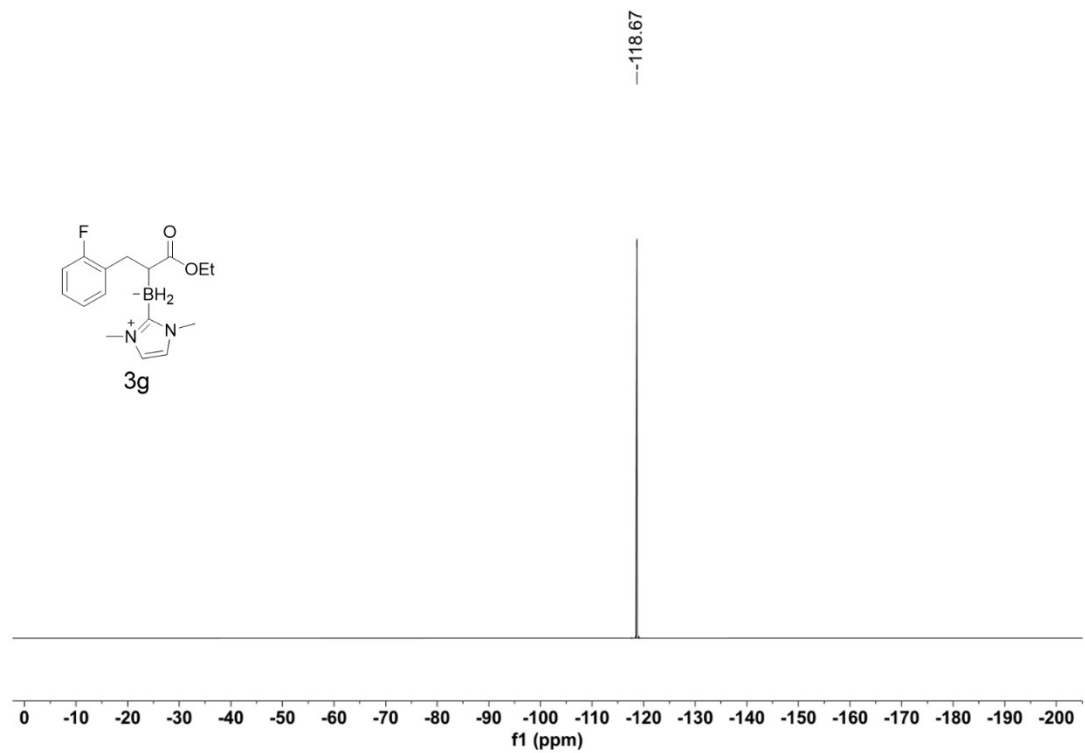

**Fig. S18** <sup>19</sup>F NMR (376 MHz, CDCl<sub>3</sub>) spectrum for **3g**.

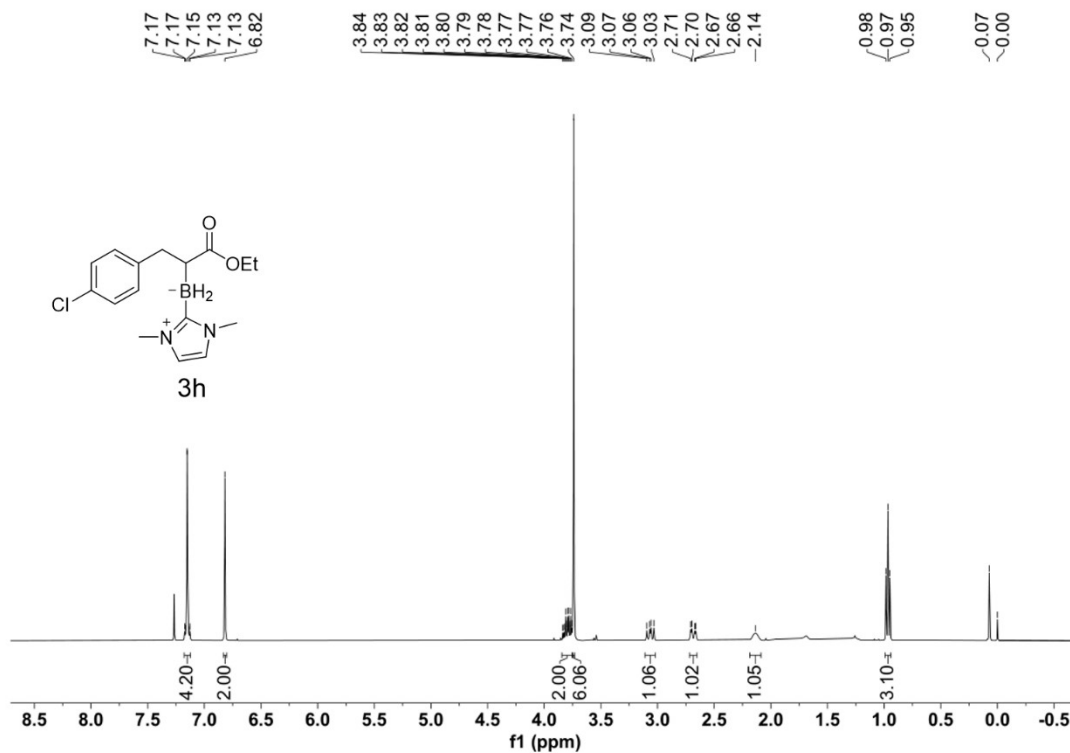

**Fig. S19** <sup>1</sup>H NMR (400 MHz, CDCl<sub>3</sub>) spectrum for **3h**.

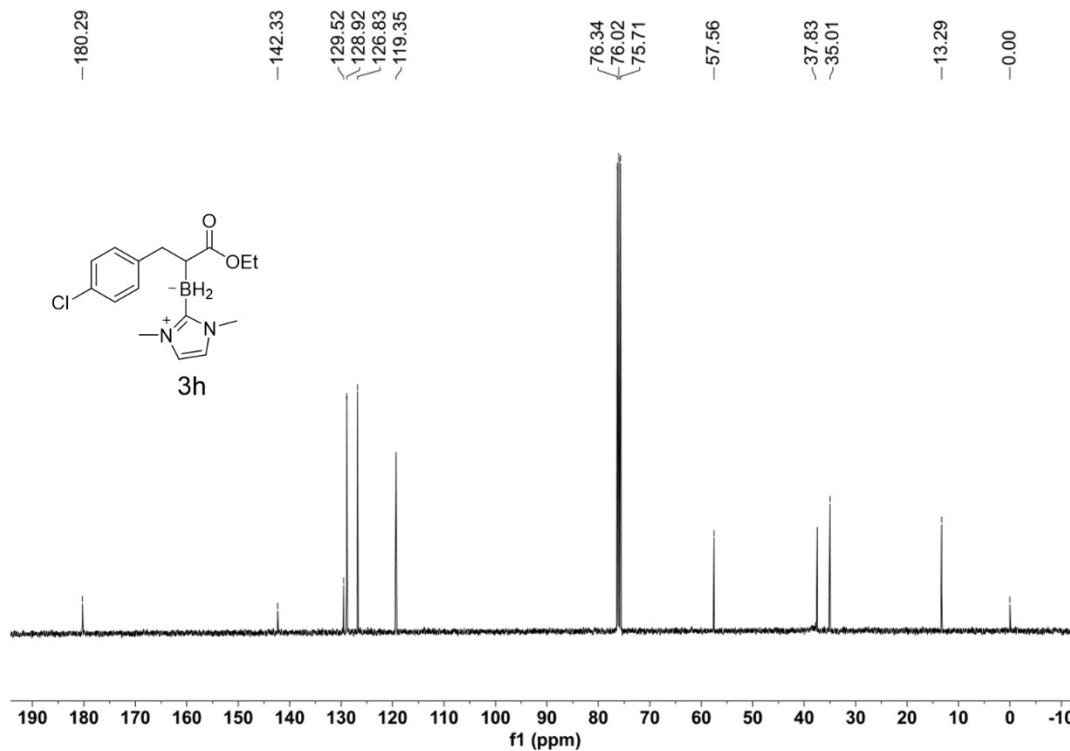

**Fig. S20** <sup>13</sup>C NMR (100 MHz, CDCl<sub>3</sub>) spectrum for **3h**.

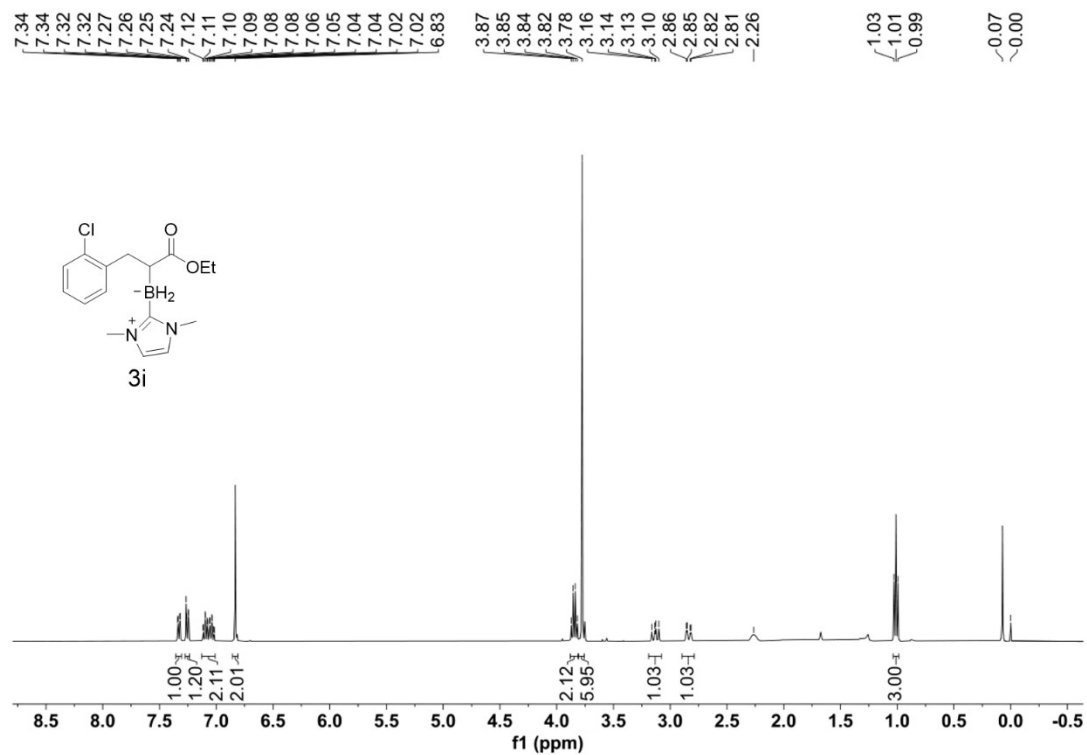

**Fig. S21** <sup>1</sup>H NMR (400 MHz, CDCl<sub>3</sub>) spectrum for **3i**.

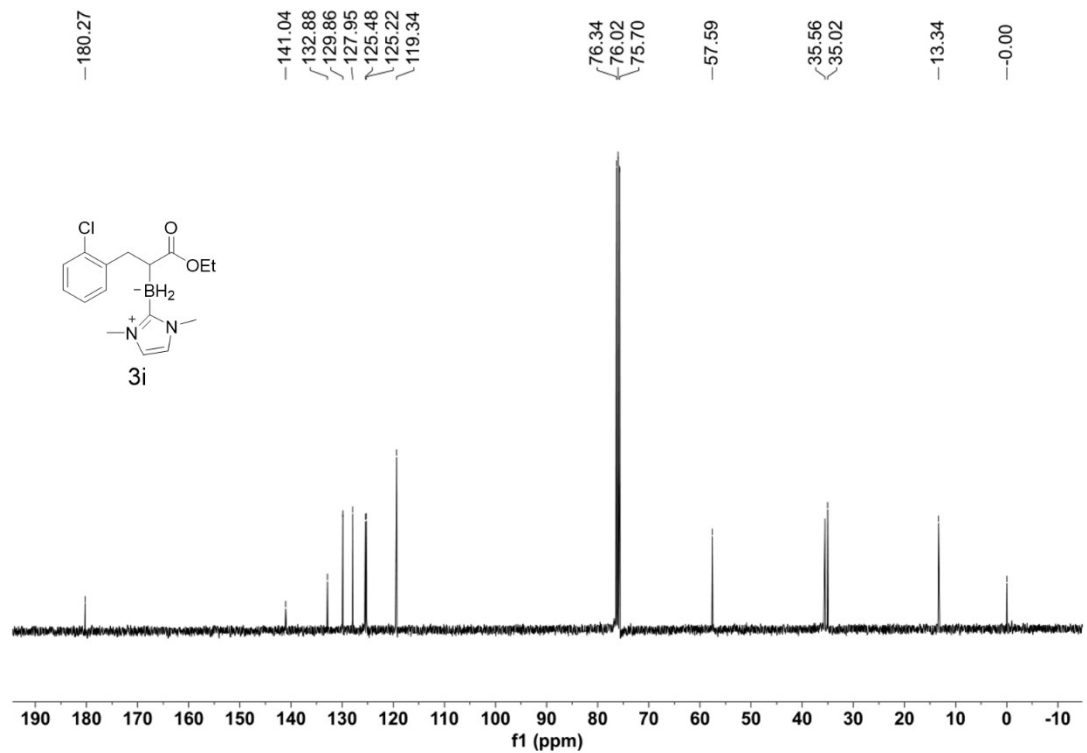

**Fig. S22** <sup>13</sup>C NMR (100 MHz, CDCl<sub>3</sub>) spectrum for **3i**.

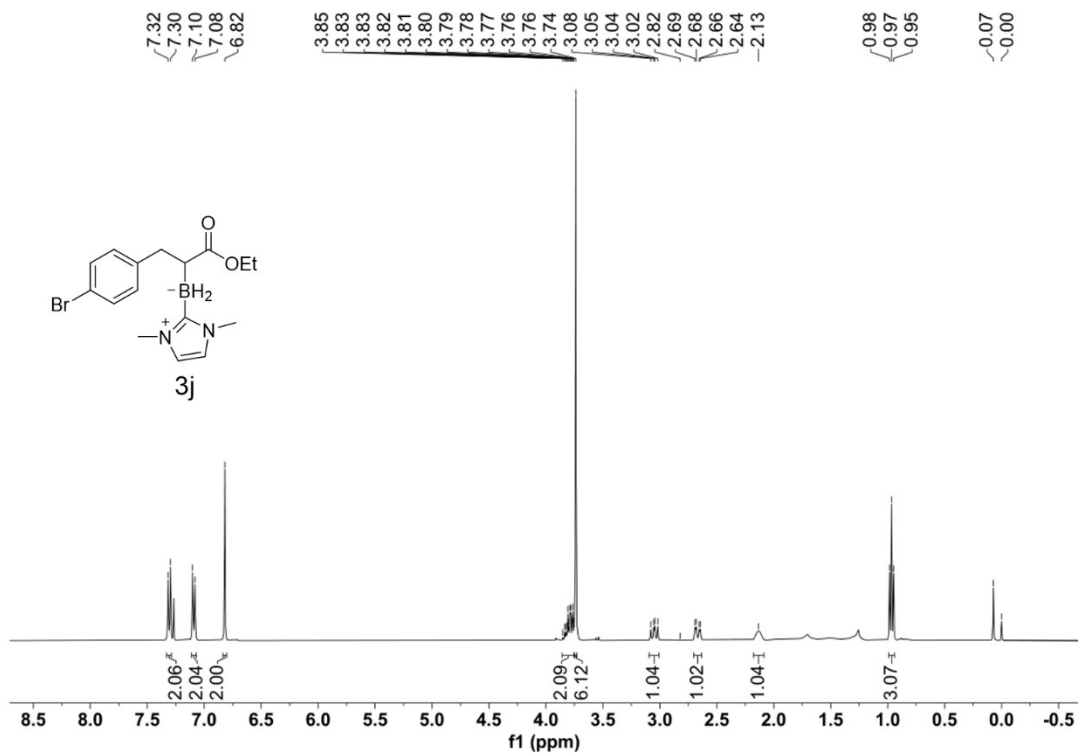

**Fig. S23** <sup>1</sup>H NMR (400 MHz, CDCl<sub>3</sub>) spectrum for **3j**.

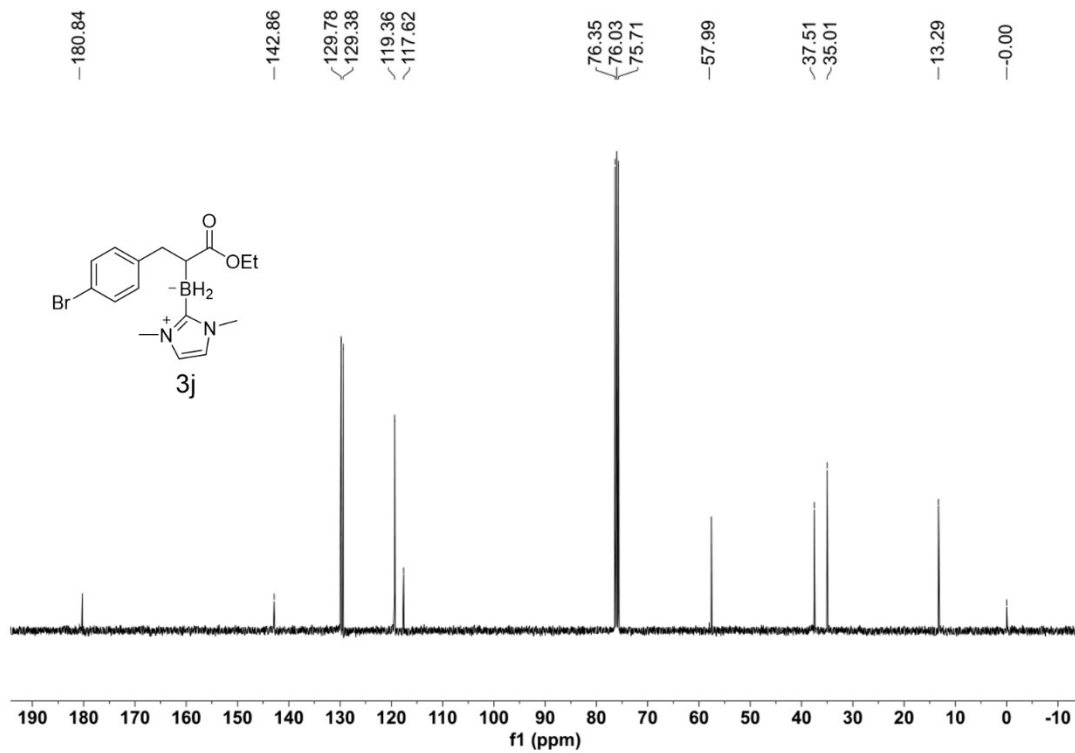

**Fig. S24** <sup>13</sup>C NMR (100 MHz, CDCl<sub>3</sub>) spectrum for **3j**.

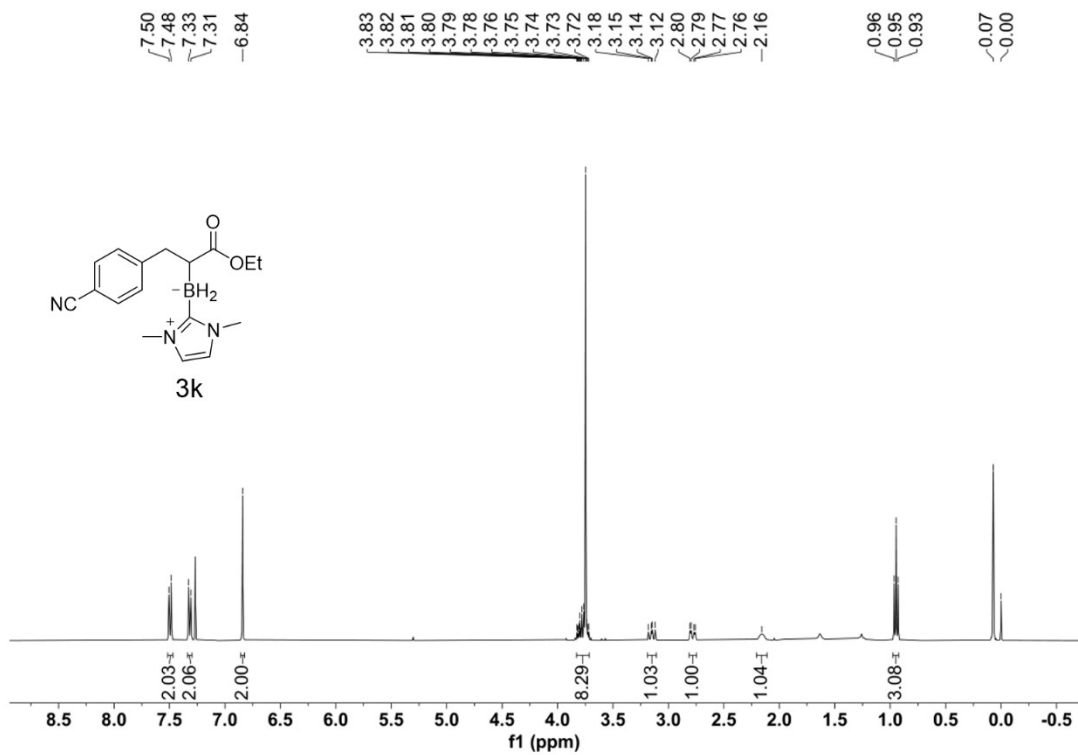

**Fig. S25** <sup>1</sup>H NMR (400 MHz, CDCl<sub>3</sub>) spectrum for **3k**.

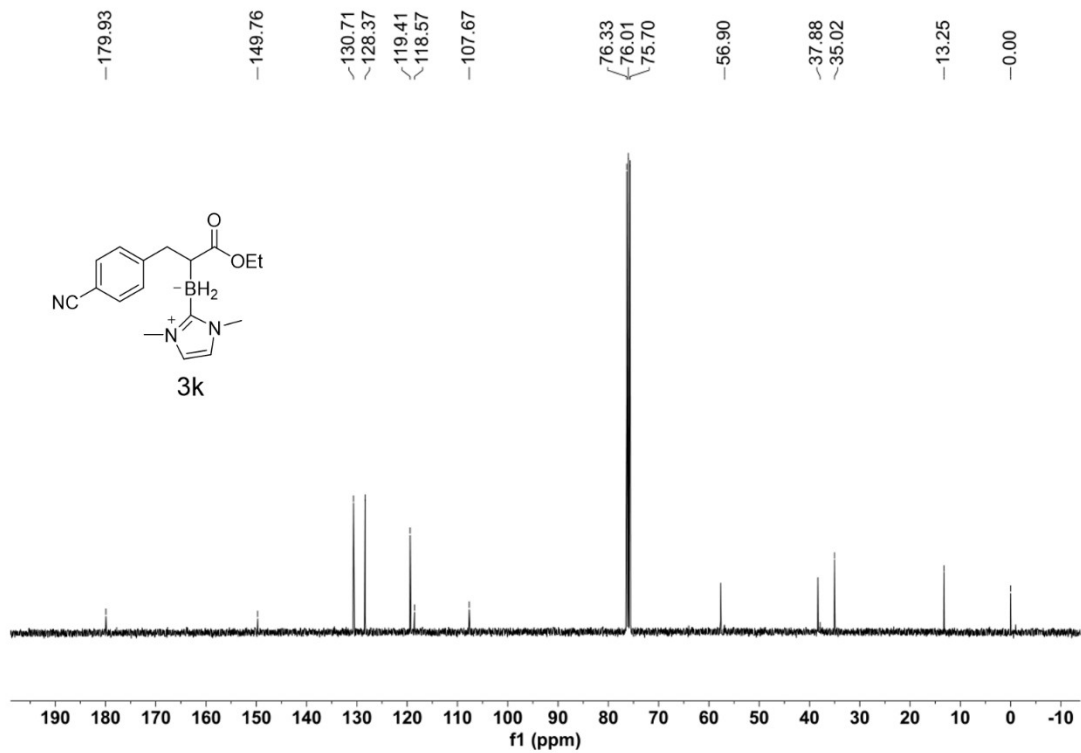

**Fig. S26** <sup>13</sup>C NMR (100 MHz, CDCl<sub>3</sub>) spectrum for **3k**.

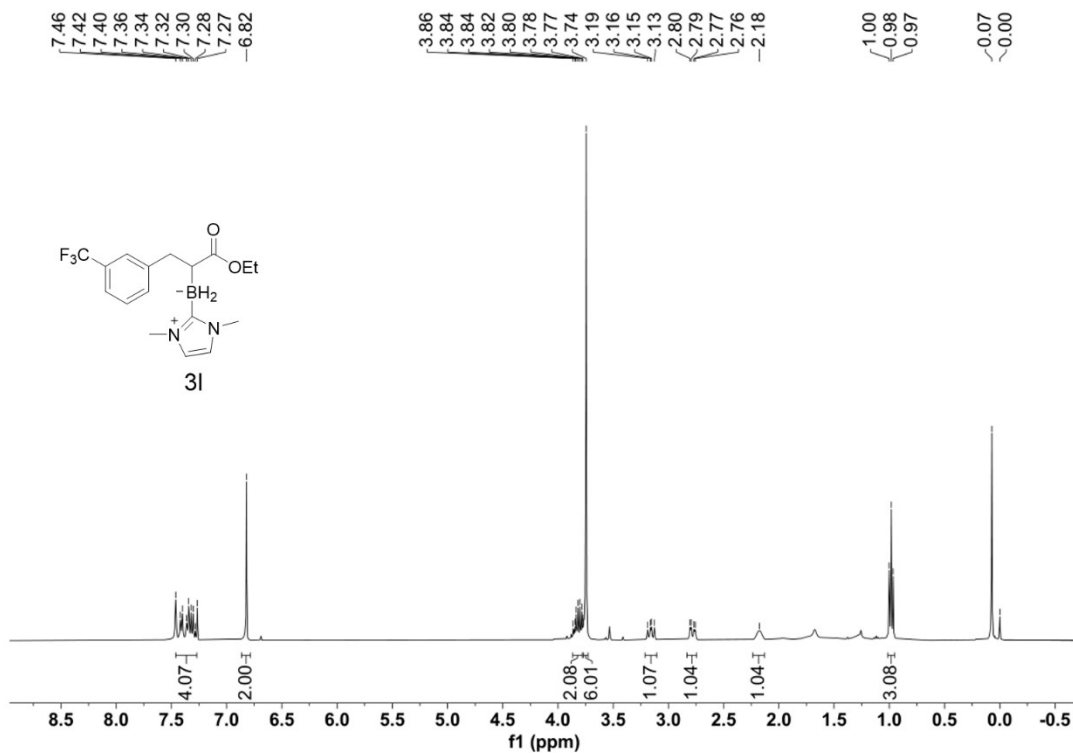

**Fig. S27**  $^1\text{H}$  NMR (400 MHz,  $\text{CDCl}_3$ ) spectrum for **31**.

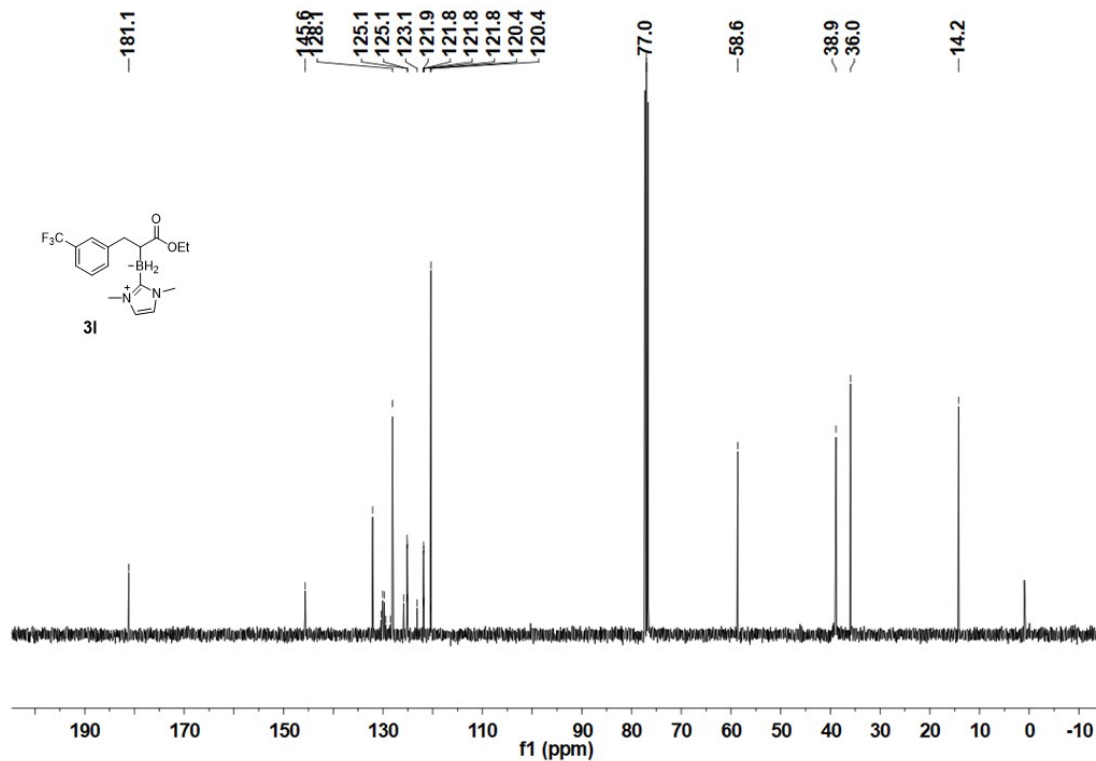

**Fig. S28**  $^{13}\text{C}$  NMR (100 MHz,  $\text{CDCl}_3$ ) spectrum for **31**.

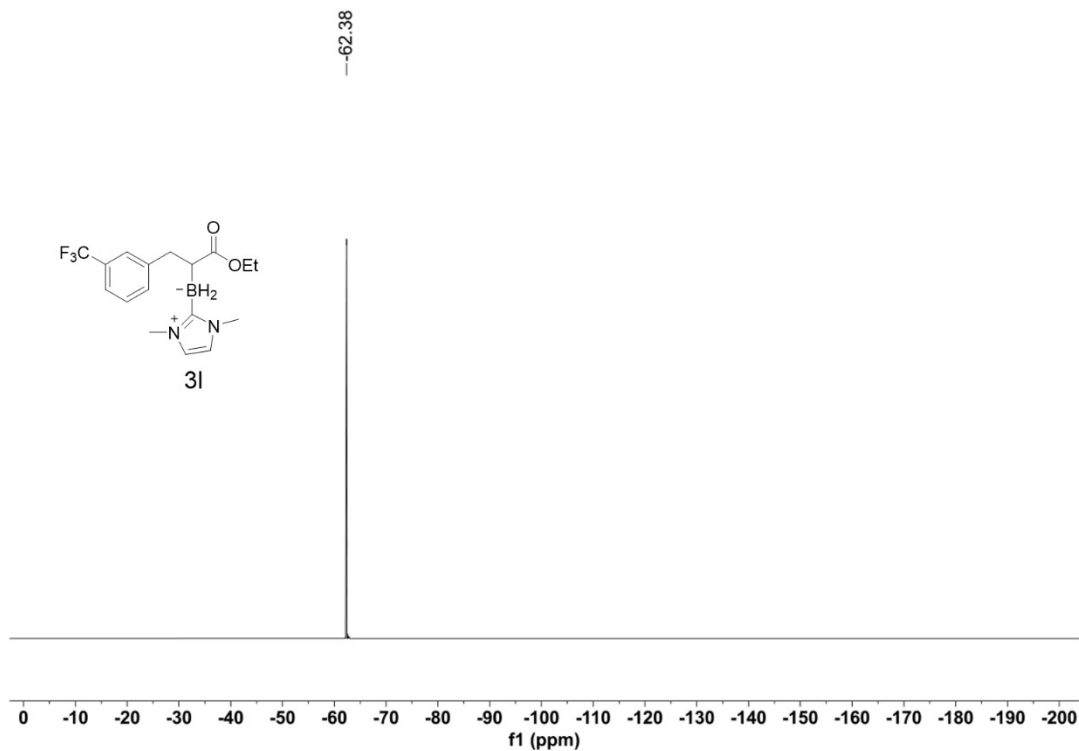

**Fig. S29**  $^{19}\text{F}$  NMR (376 MHz,  $\text{CDCl}_3$ ) spectrum for **3l**.

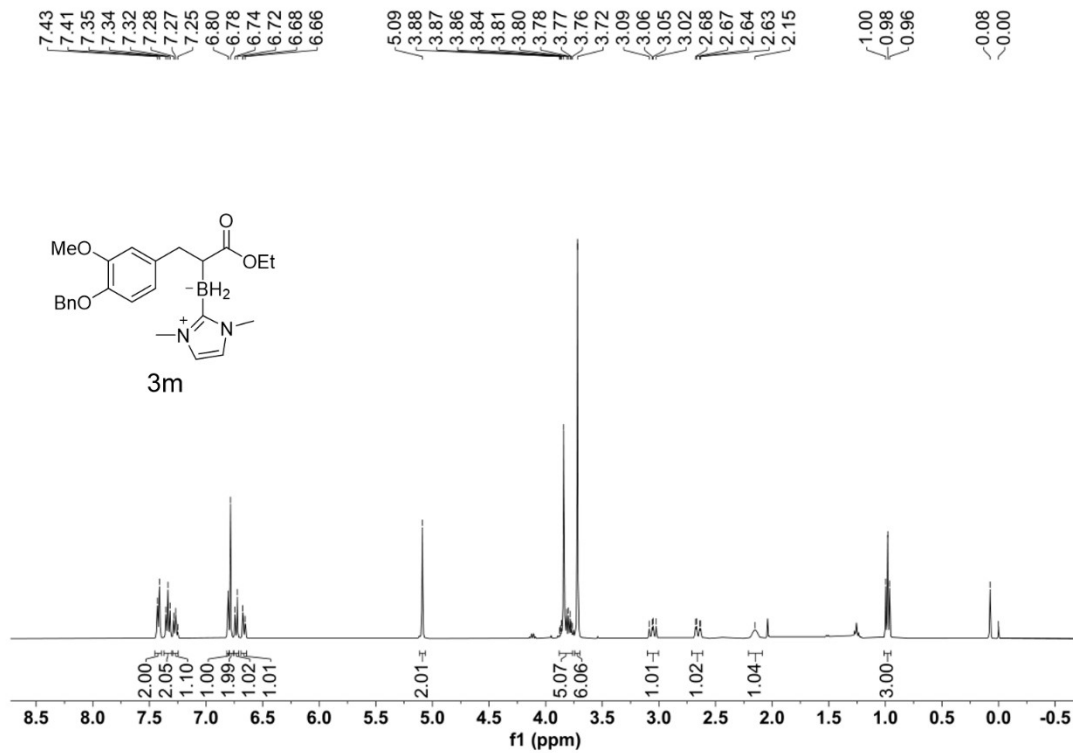

**Fig. S30**  $^1\text{H}$  NMR (400 MHz,  $\text{CDCl}_3$ ) spectrum for **3m**.



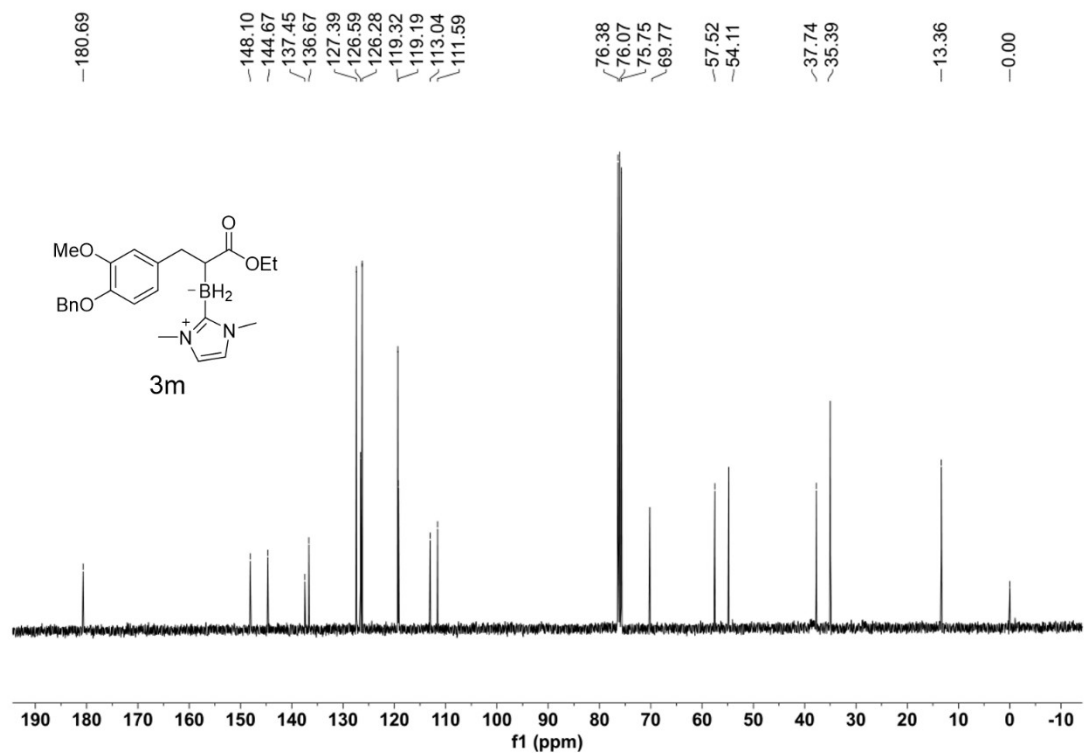

Fig. S31  $^{13}\text{C}$  NMR (100 MHz,  $\text{CDCl}_3$ ) spectrum for **3m**.

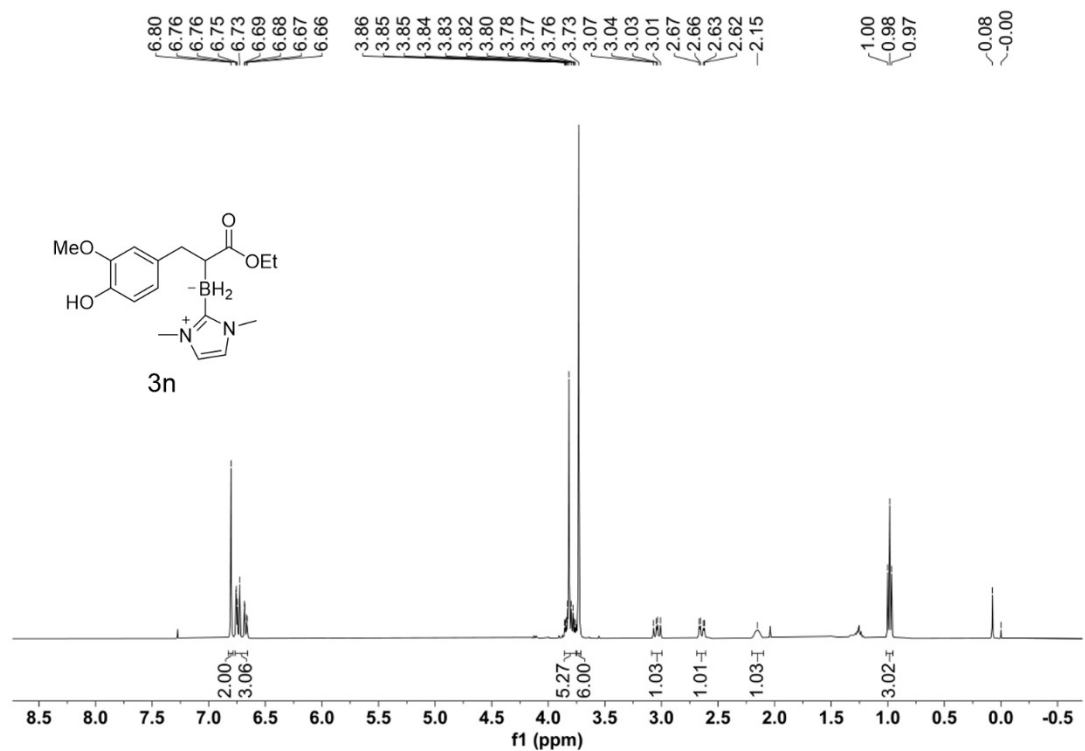

Fig. S32  $^1\text{H}$  NMR (400 MHz,  $\text{CDCl}_3$ ) spectrum for **3n**.

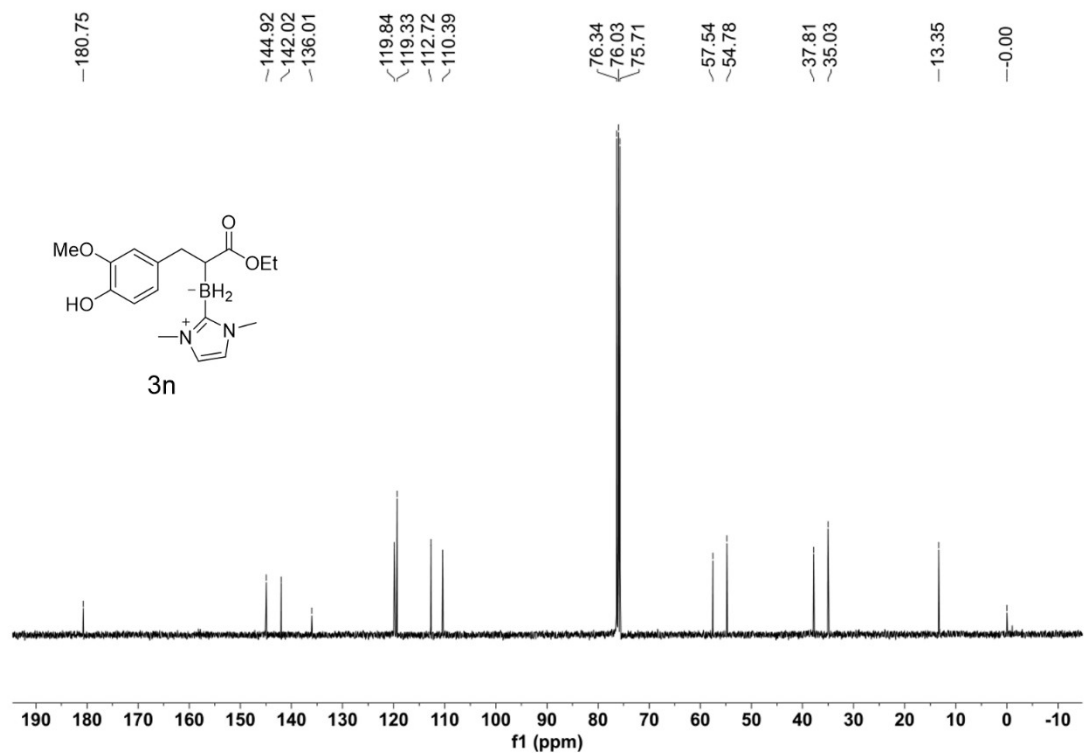

**Fig. S33**  $^{13}\text{C}$  NMR (100 MHz,  $\text{CDCl}_3$ ) spectrum for **3n**.

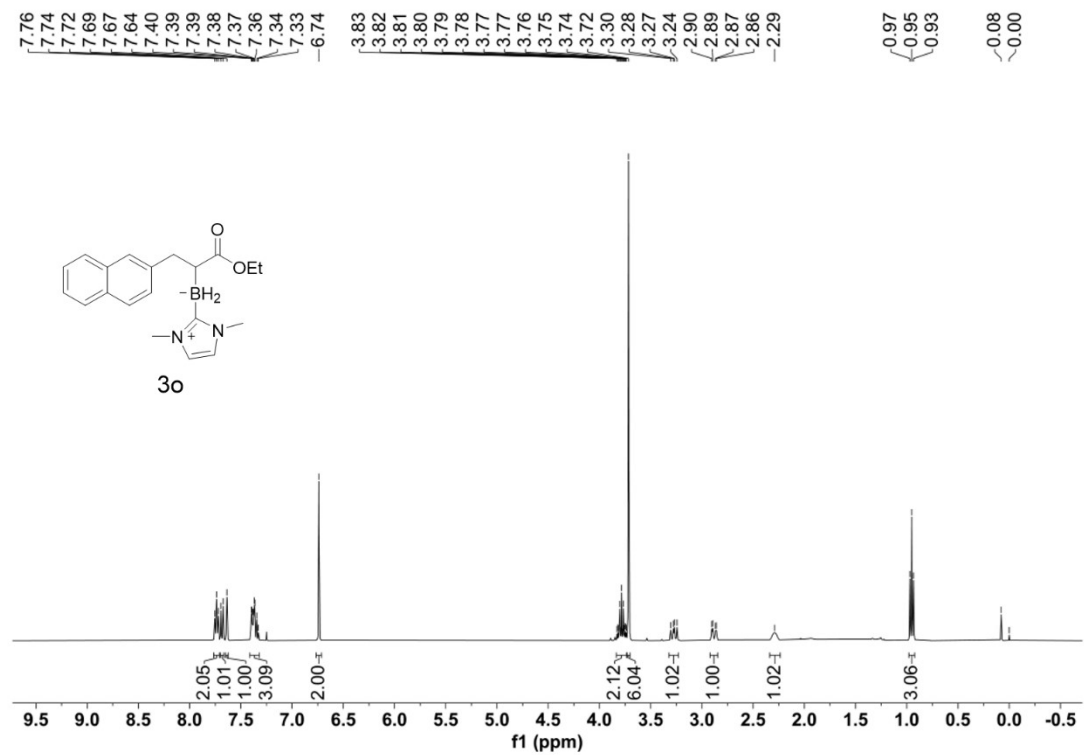

**Fig. S34**  $^1\text{H}$  NMR (400 MHz,  $\text{CDCl}_3$ ) spectrum for **3o**.

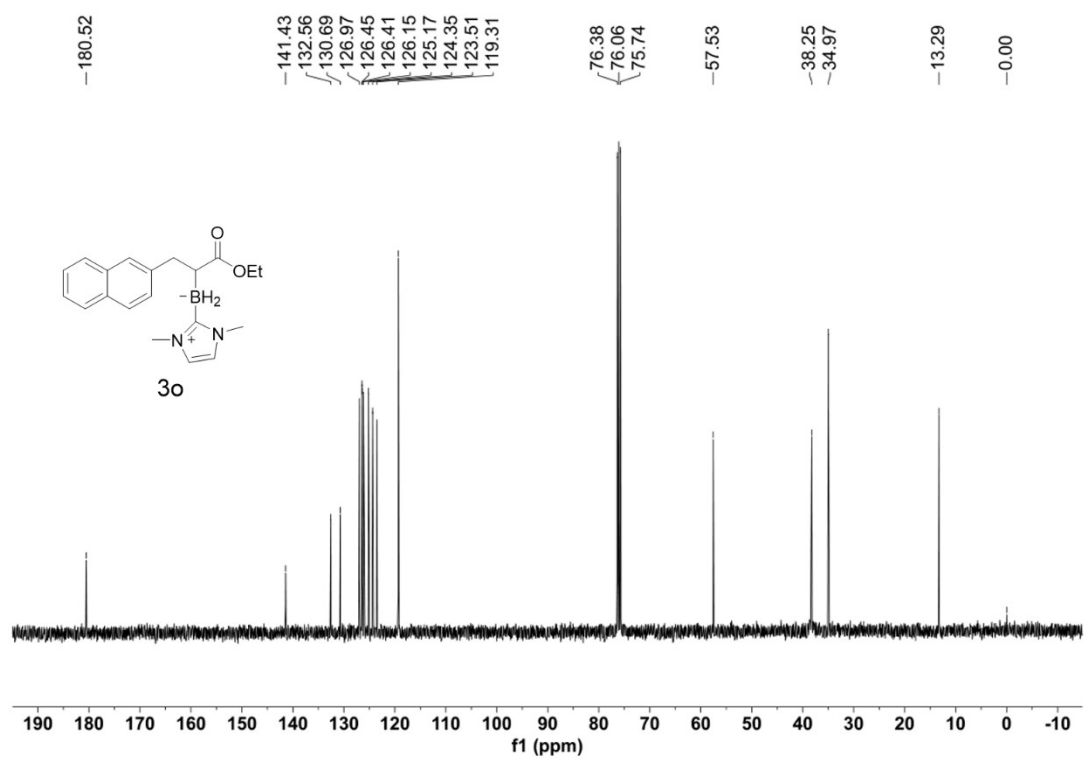

Fig. S35  $^{13}\text{C}$  NMR (100 MHz,  $\text{CDCl}_3$ ) spectrum for **3o**.

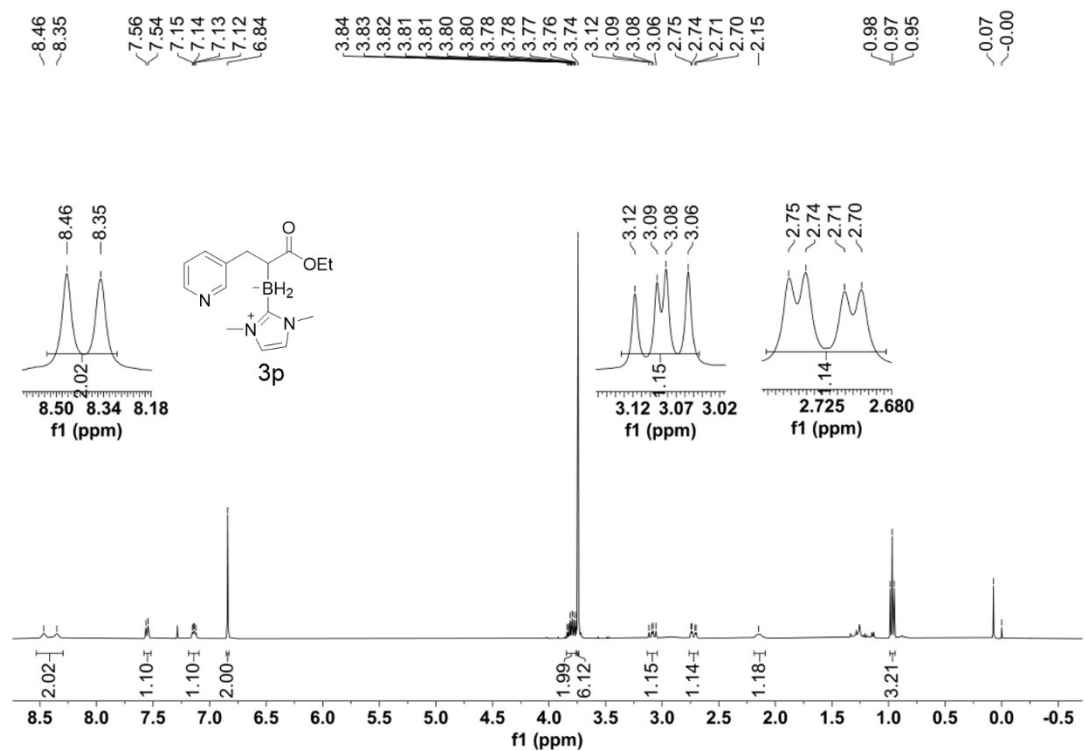

Fig. S36  $^1\text{H}$  NMR (400 MHz,  $\text{CDCl}_3$ ) spectrum for **3p**.

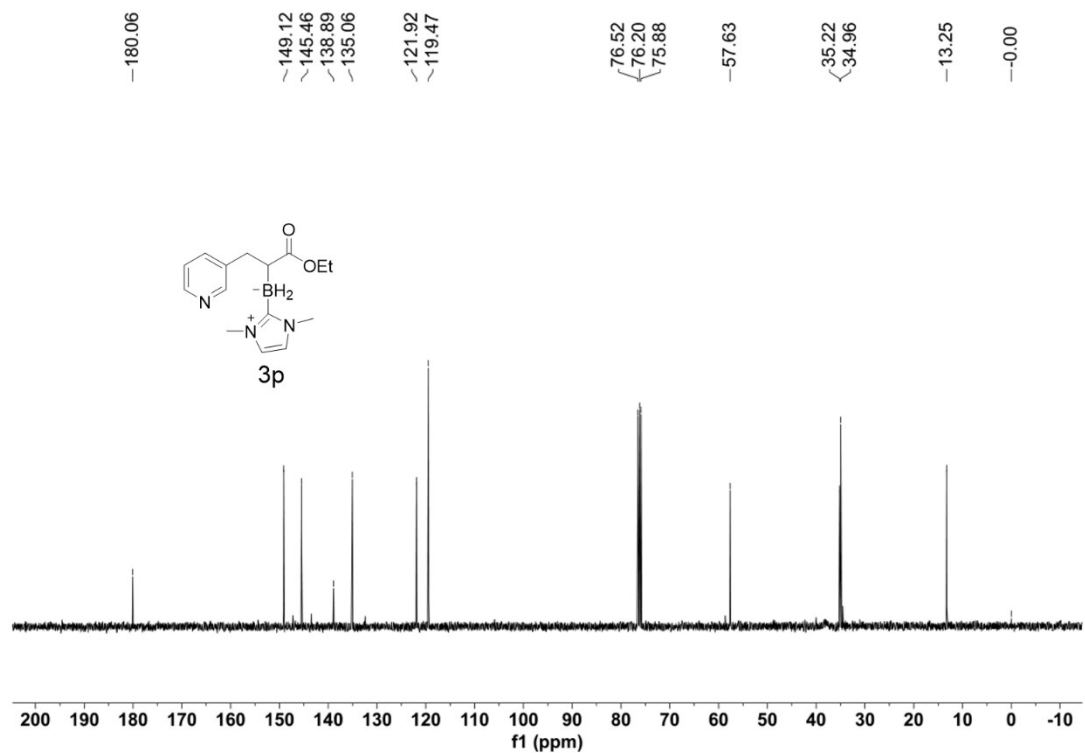

**Fig. S37**  $^{13}\text{C}$  NMR (100 MHz,  $\text{CDCl}_3$ ) spectrum for **3p**.

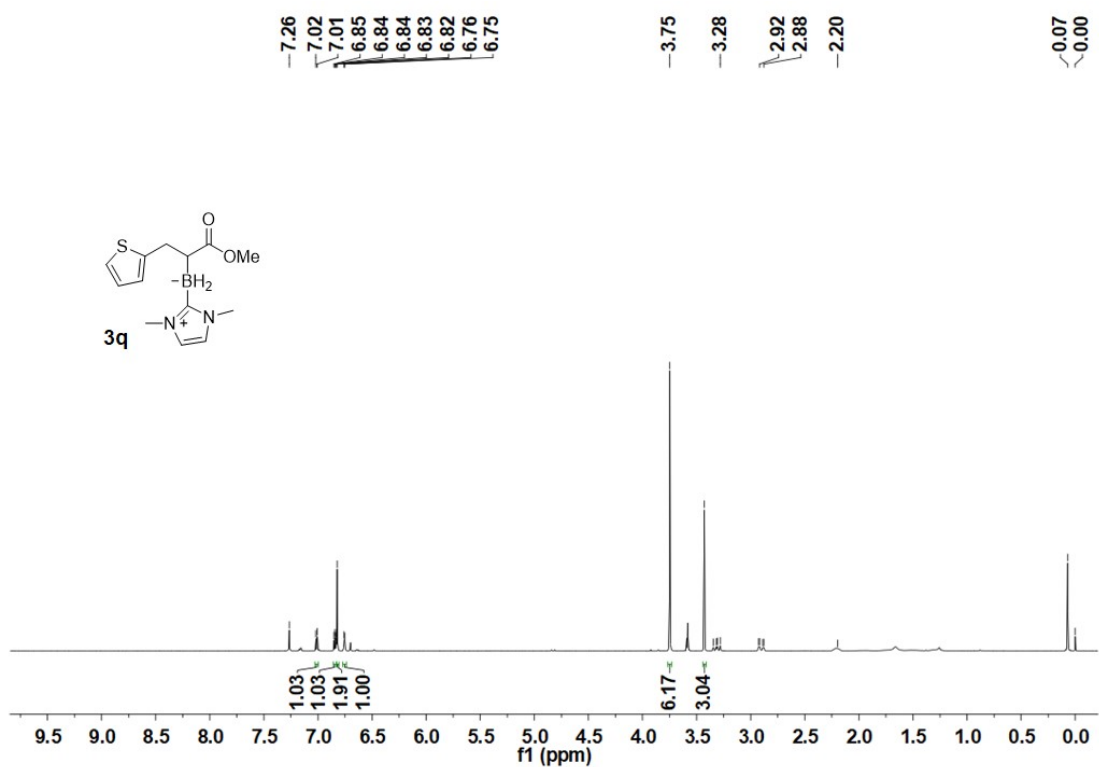

**Fig. S38**  $^1\text{H}$  NMR (400 MHz,  $\text{CDCl}_3$ ) spectrum for **3q**.

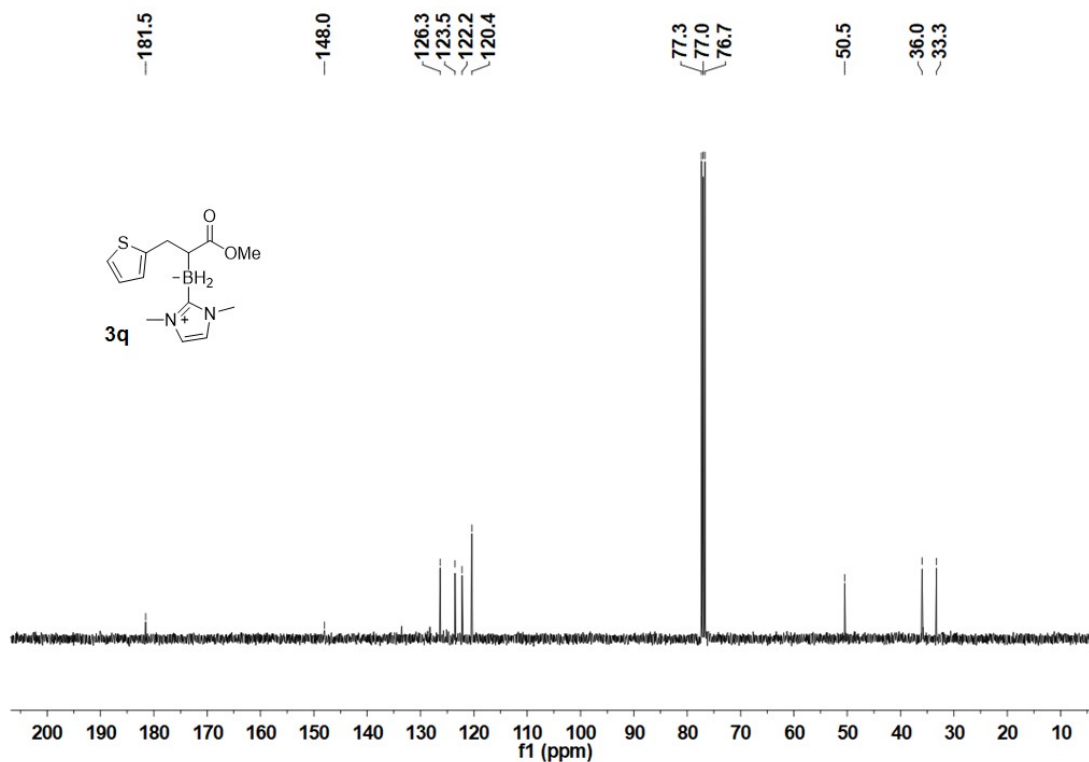

**Fig. S39**  $^{13}\text{C}$  NMR (100 MHz,  $\text{CDCl}_3$ ) spectrum for **3q**.

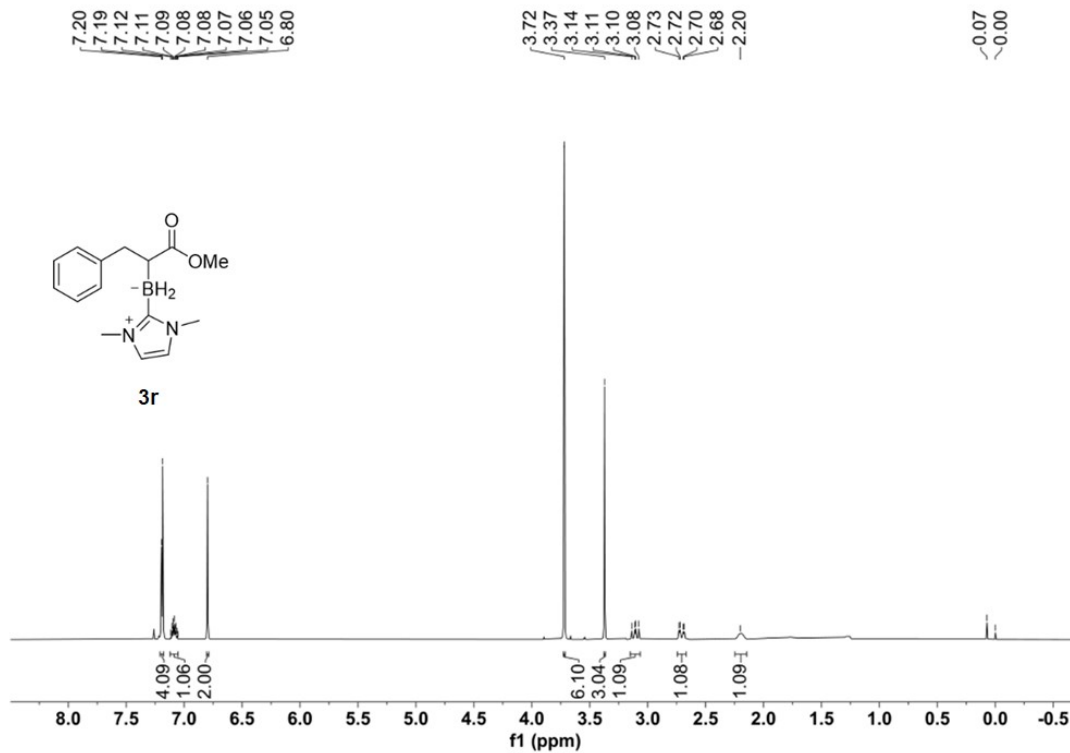

**Fig. S40**  $^1\text{H}$  NMR (400 MHz,  $\text{CDCl}_3$ ) spectrum for **3r**.

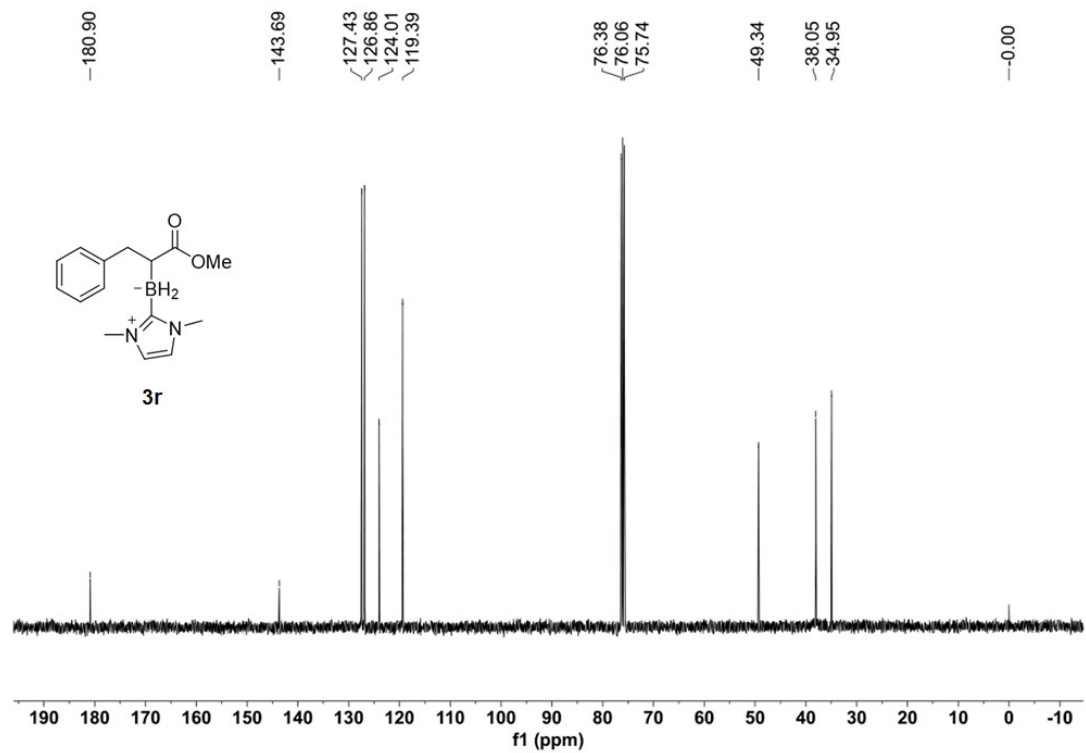

Fig. S41  $^{13}\text{C}$  NMR (100 MHz,  $\text{CDCl}_3$ ) spectrum for **3r**.

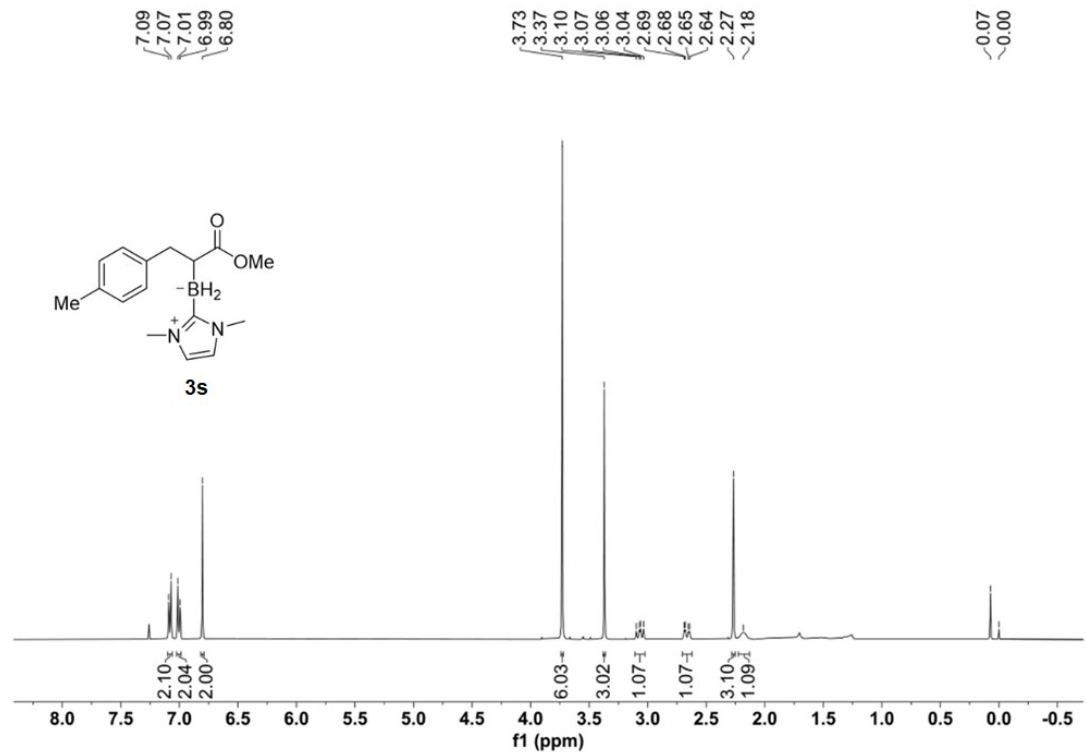

Fig. S42  $^1\text{H}$  NMR (400 MHz,  $\text{CDCl}_3$ ) spectrum for **3s**.

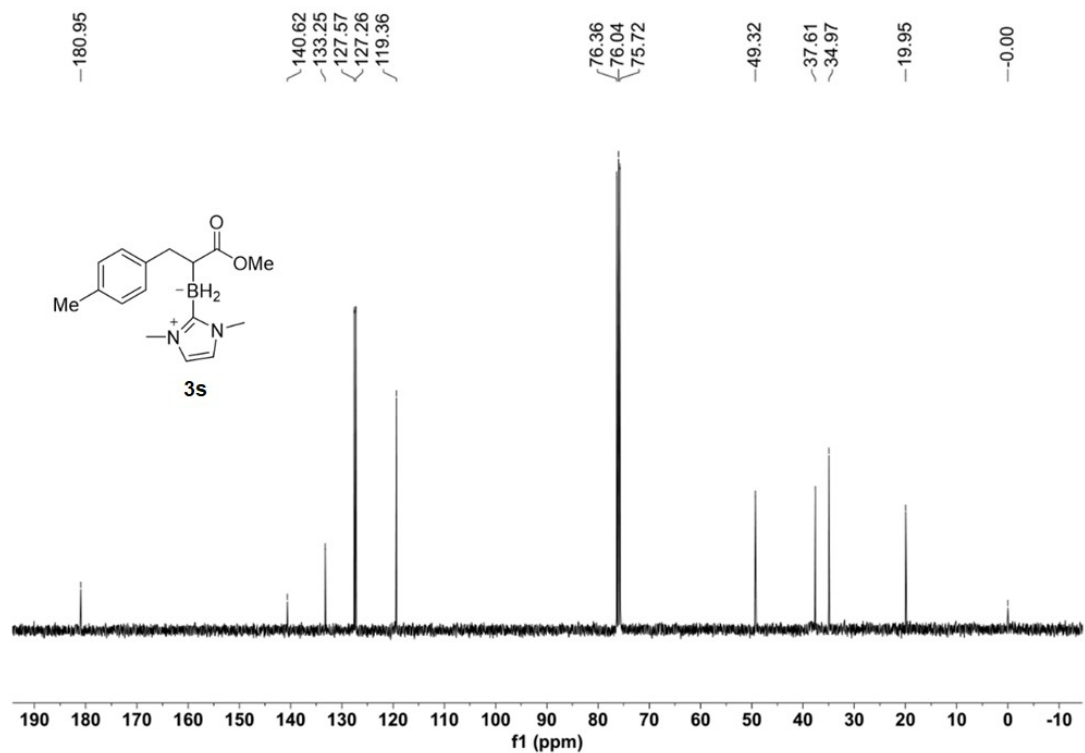

**Fig. S43**  $^{13}\text{C}$  NMR (100 MHz,  $\text{CDCl}_3$ ) spectrum for **3s**.

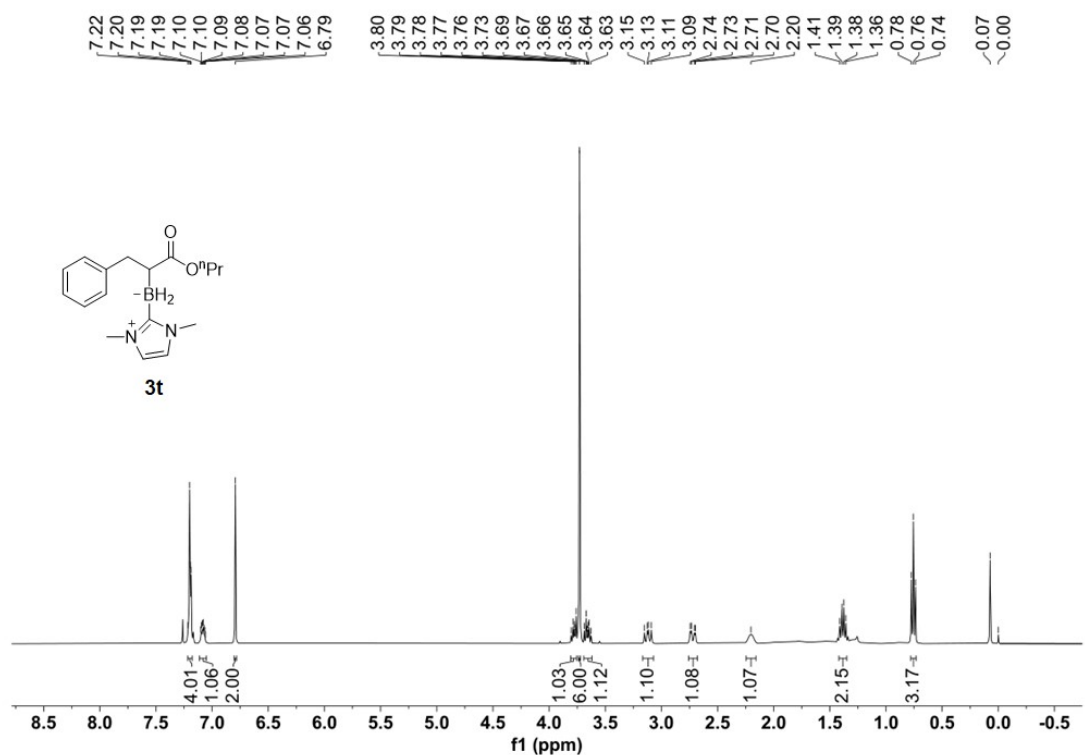

**Fig. S44**  $^1\text{H}$  NMR (400 MHz,  $\text{CDCl}_3$ ) spectrum for **3t**.

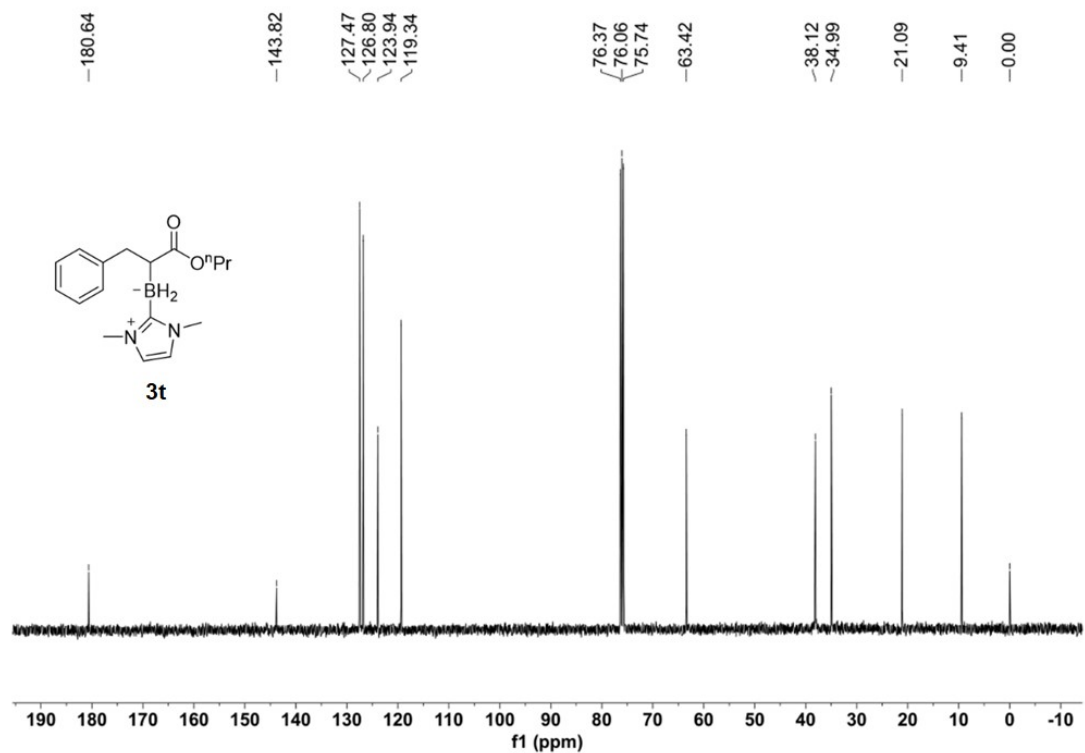

Fig. S45  $^{13}\text{C}$  NMR (100 MHz,  $\text{CDCl}_3$ ) spectrum for **3t**.

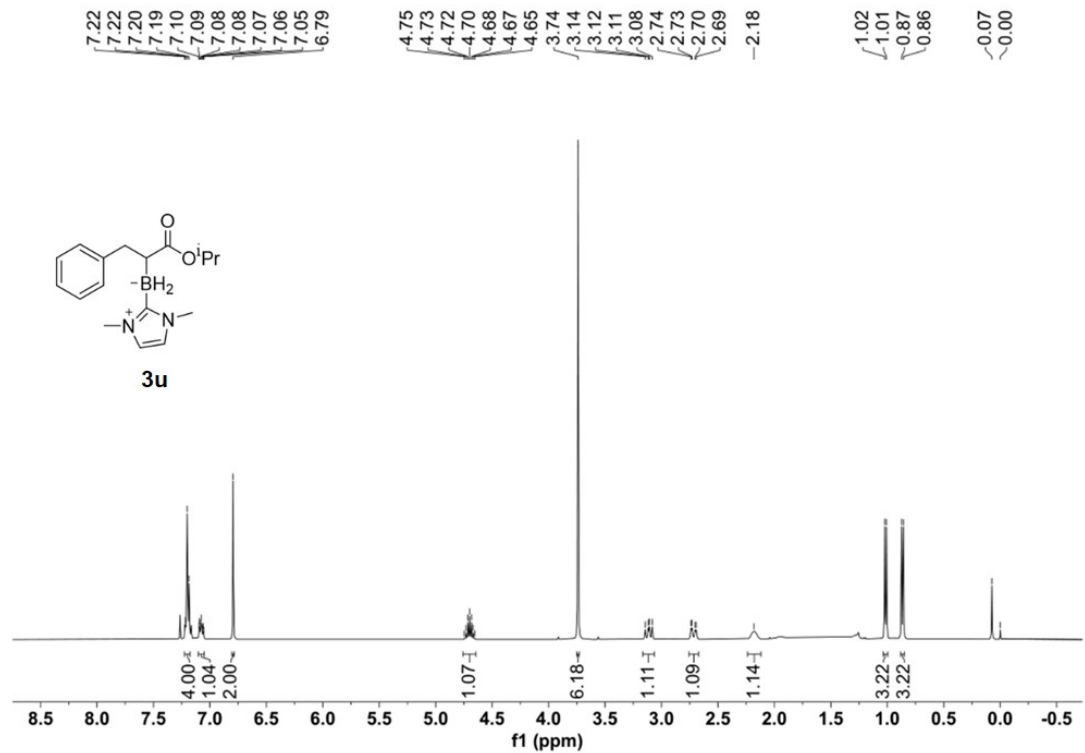

Fig. S46  $^1\text{H}$  NMR (400 MHz,  $\text{CDCl}_3$ ) spectrum for **3u**.



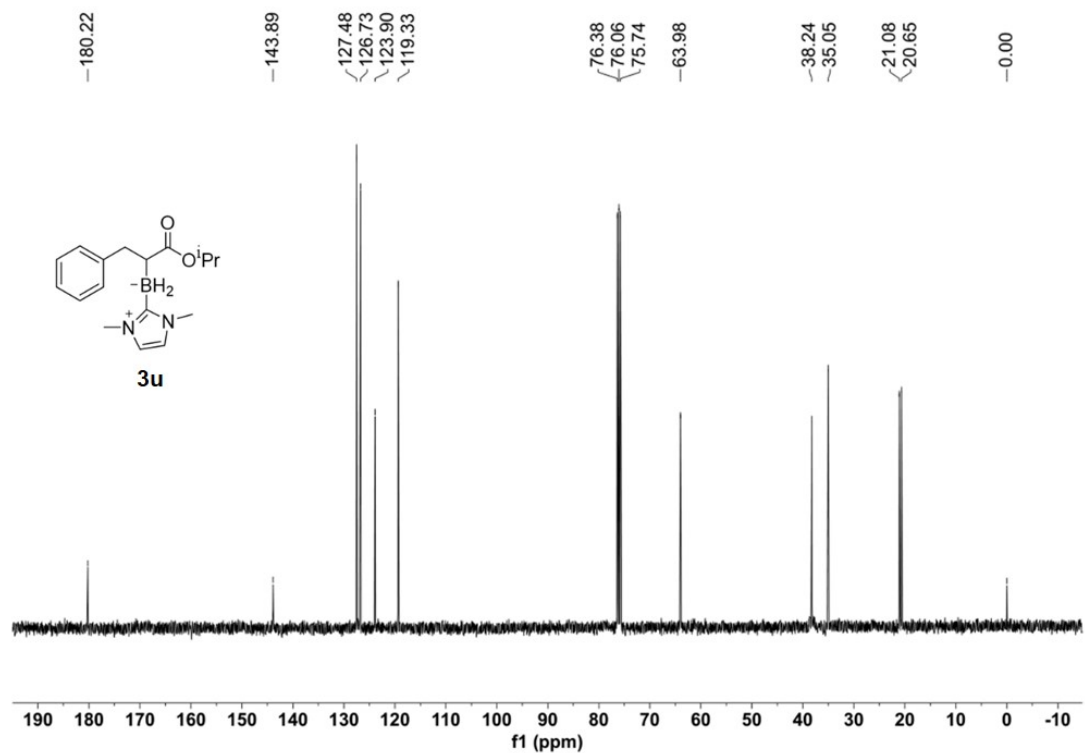

Fig. S47 <sup>13</sup>C NMR (100 MHz, CDCl<sub>3</sub>) spectrum for **3u**.

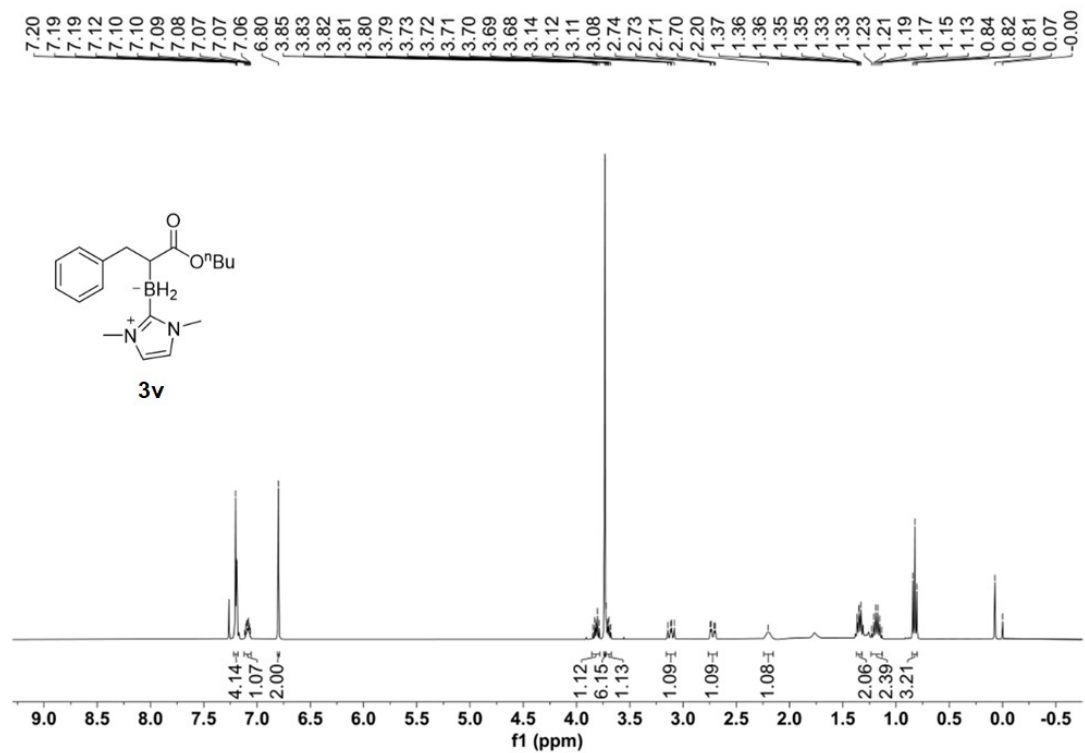

Fig. S48 <sup>1</sup>H NMR (400 MHz, CDCl<sub>3</sub>) spectrum for **3v**.

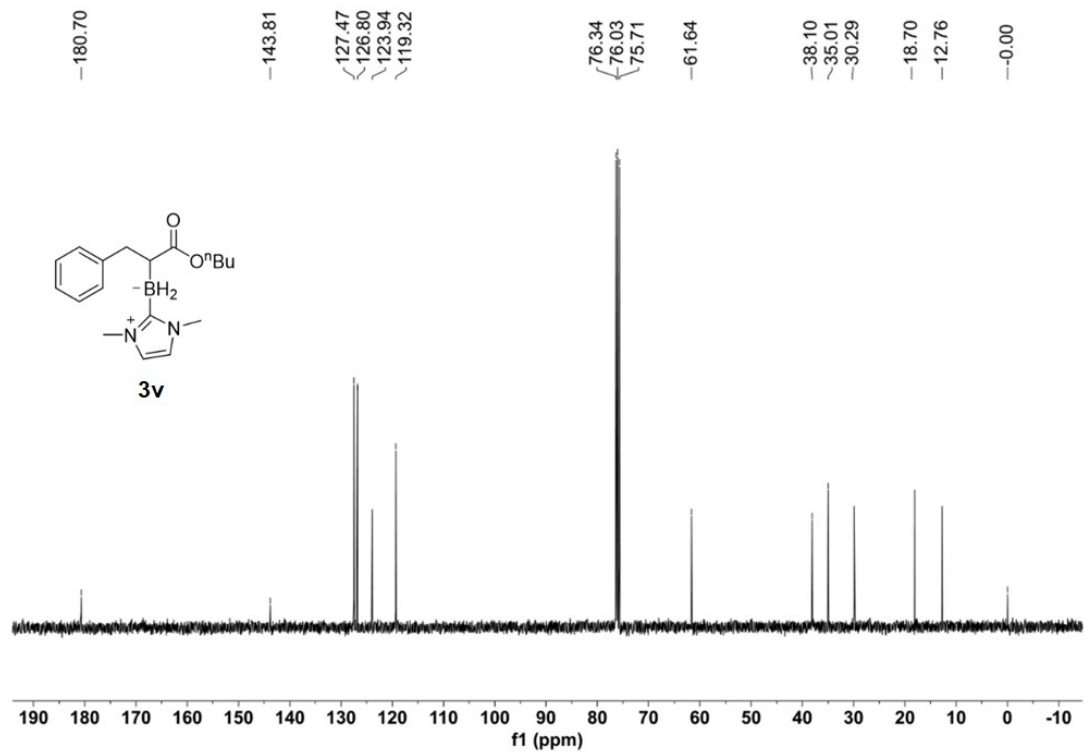

**Fig. S49** <sup>13</sup>C NMR (100 MHz, CDCl<sub>3</sub>) spectrum for **3v**.

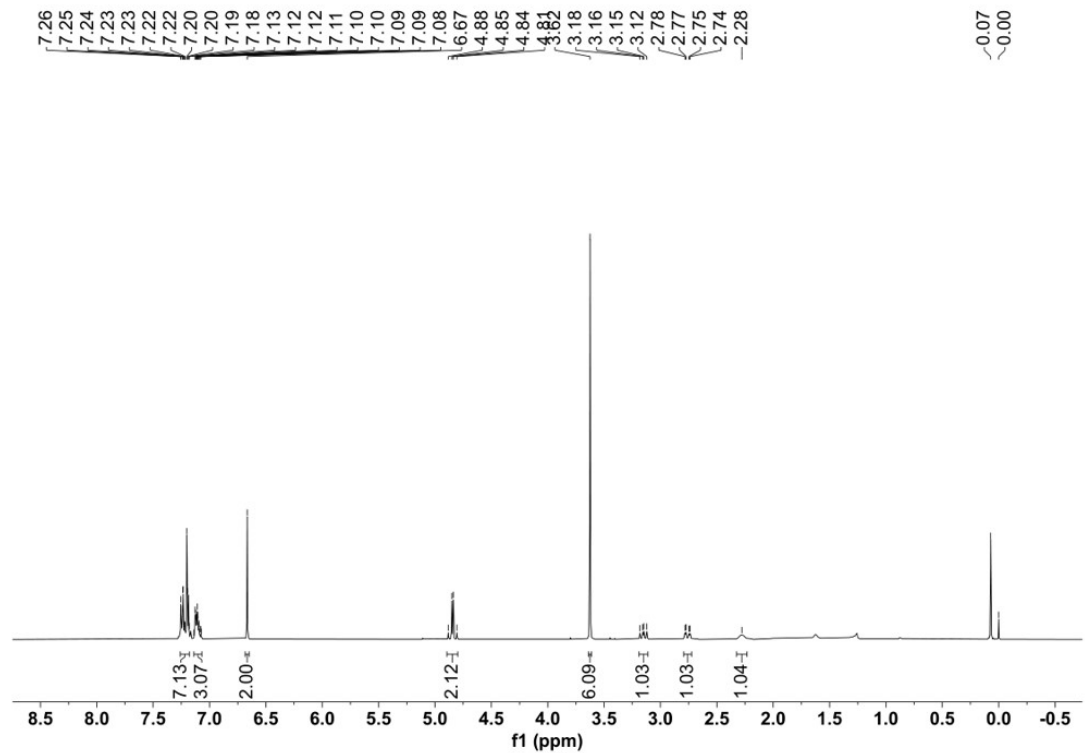

**Fig. S50** <sup>1</sup>H NMR (400 MHz, CDCl<sub>3</sub>) spectrum for **3w**.

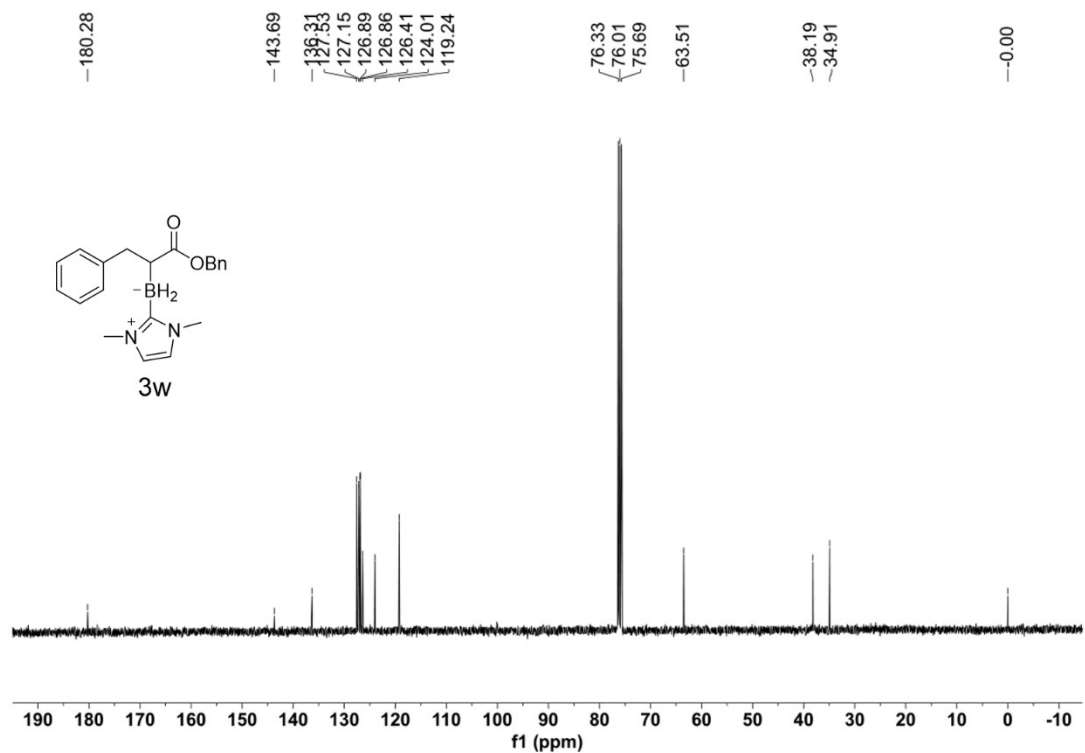

Fig. S51  $^{13}\text{C}$  NMR (100 MHz,  $\text{CDCl}_3$ ) spectrum for **3w**.

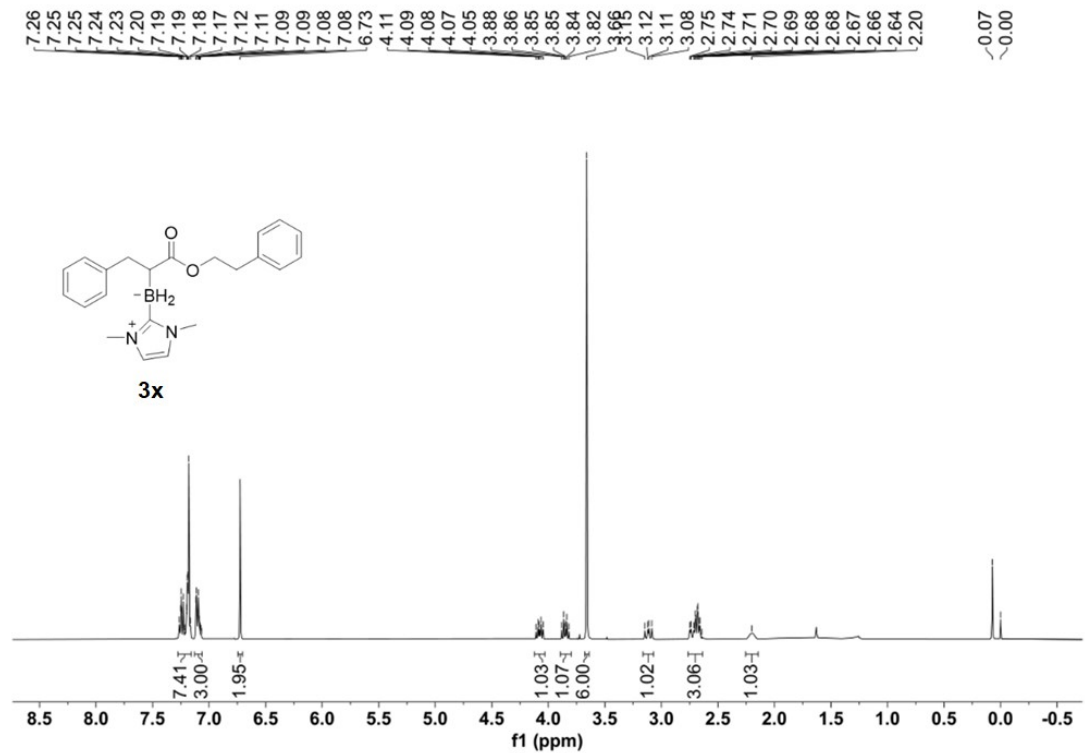

Fig. S52  $^1\text{H}$  NMR (400 MHz,  $\text{CDCl}_3$ ) spectrum for **3x**.

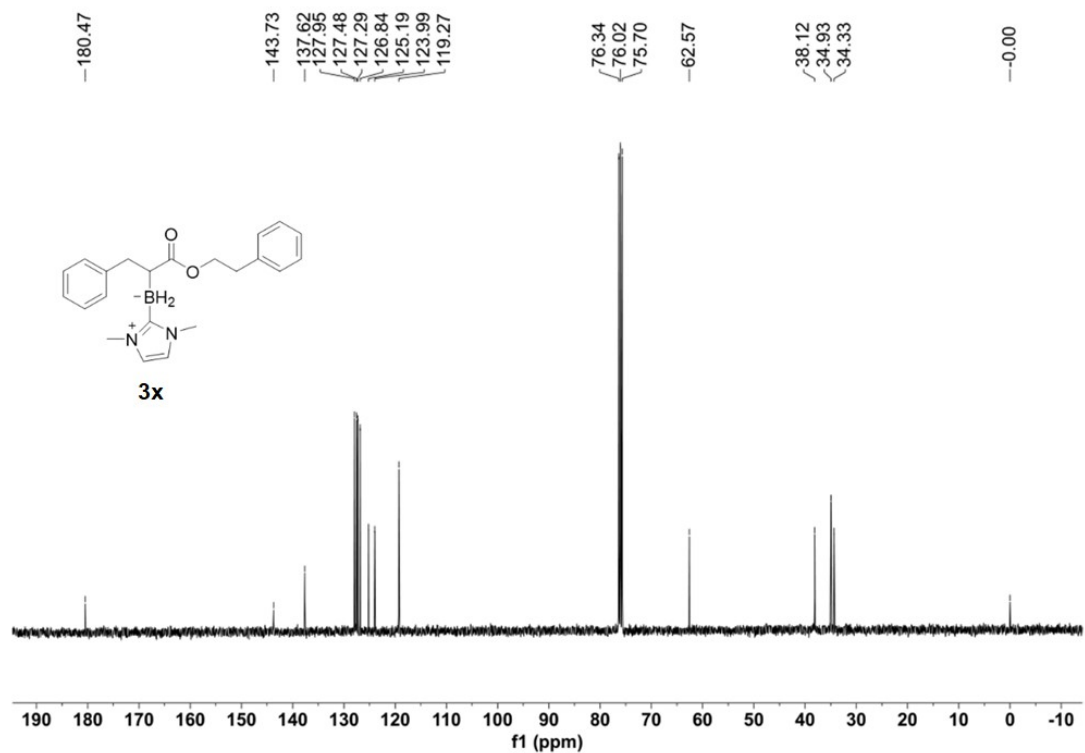

Fig. S53  $^{13}\text{C}$  NMR (100 MHz,  $\text{CDCl}_3$ ) spectrum for **3x**.

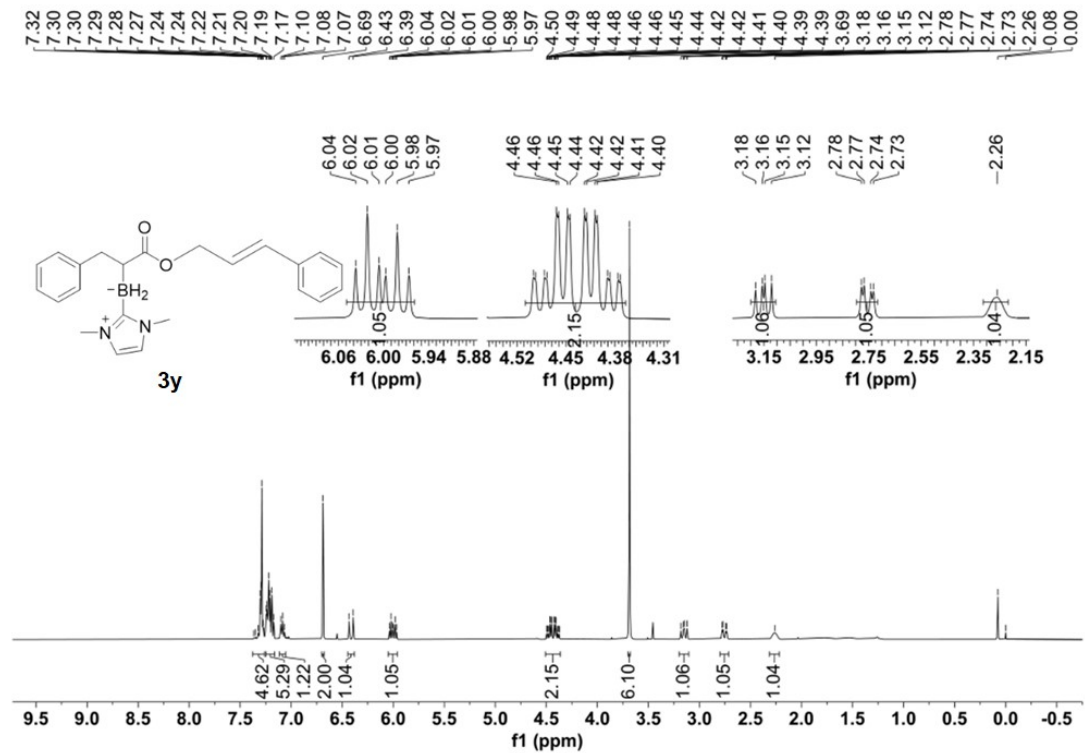

Fig. S54  $^1\text{H}$  NMR (400 MHz,  $\text{CDCl}_3$ ) spectrum for **3y**.

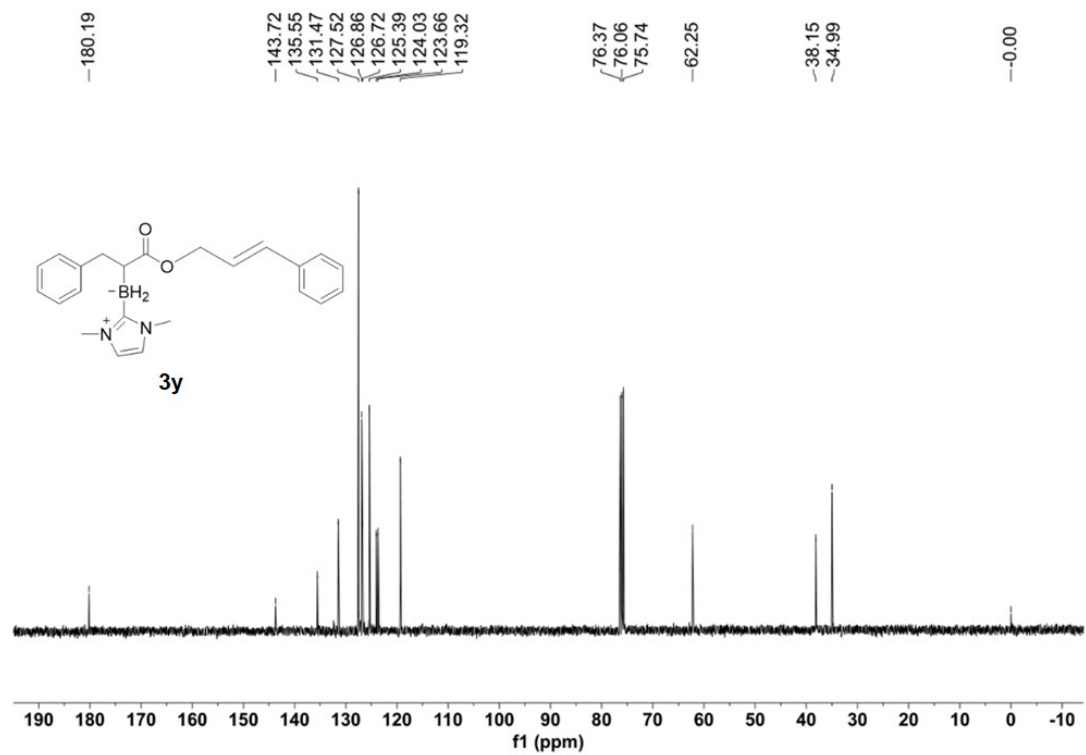

Fig. S55 <sup>13</sup>C NMR (100 MHz, CDCl<sub>3</sub>) spectrum for **3y**.

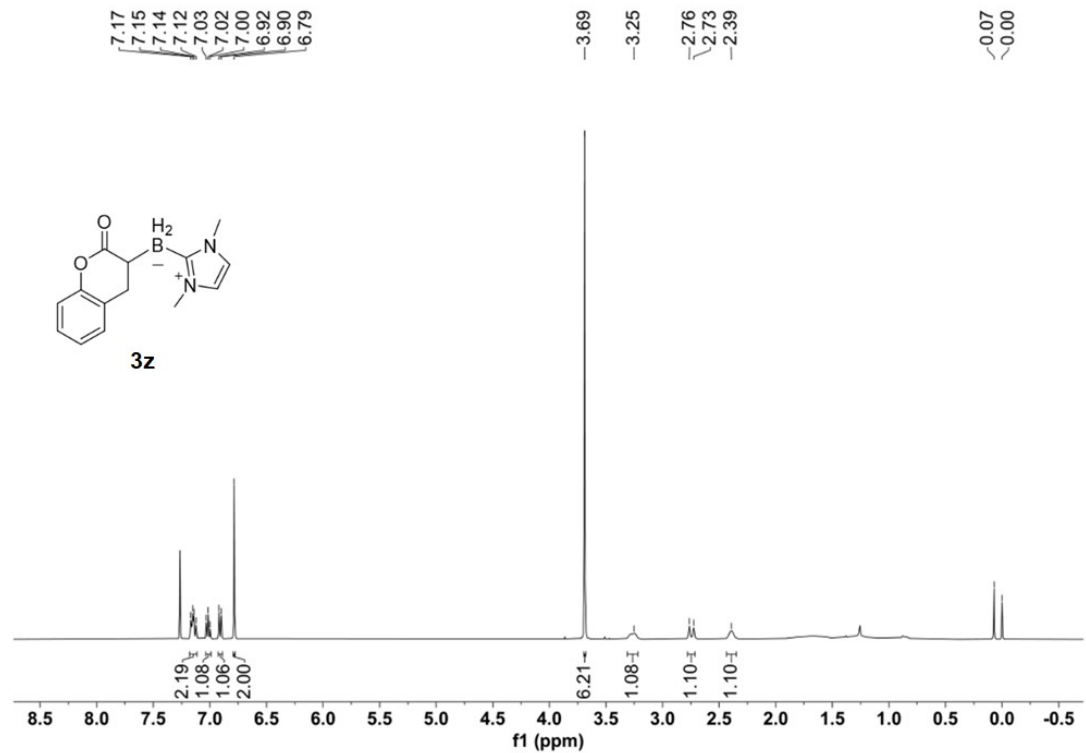

Fig. S56 <sup>1</sup>H NMR (400 MHz, CDCl<sub>3</sub>) spectrum for **3z**.

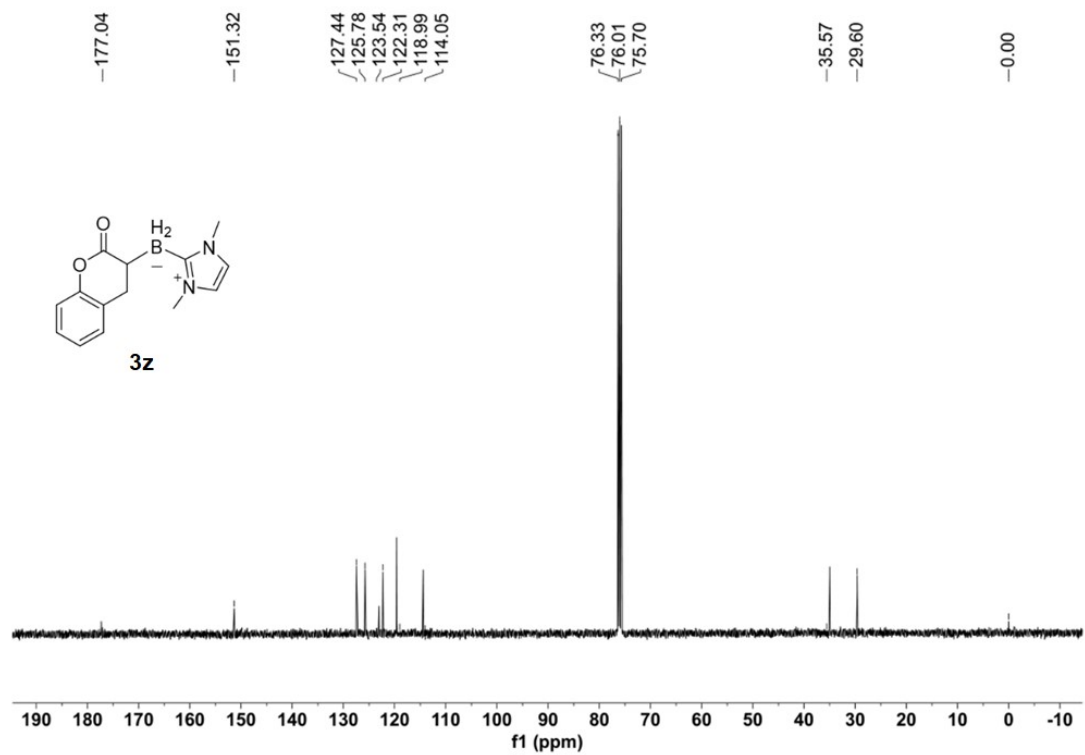

Fig. S57 <sup>13</sup>C NMR (100 MHz, CDCl<sub>3</sub>) spectrum for **3z**.

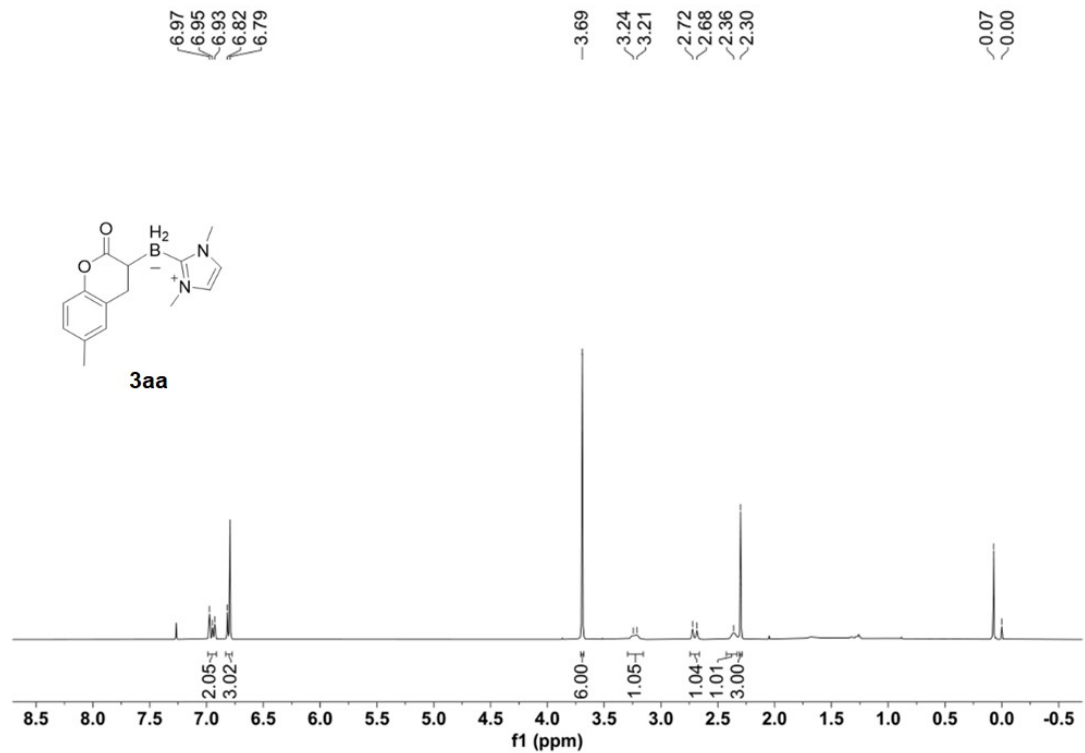

Fig. S58 <sup>1</sup>H NMR (400 MHz, CDCl<sub>3</sub>) spectrum for **3aa**.

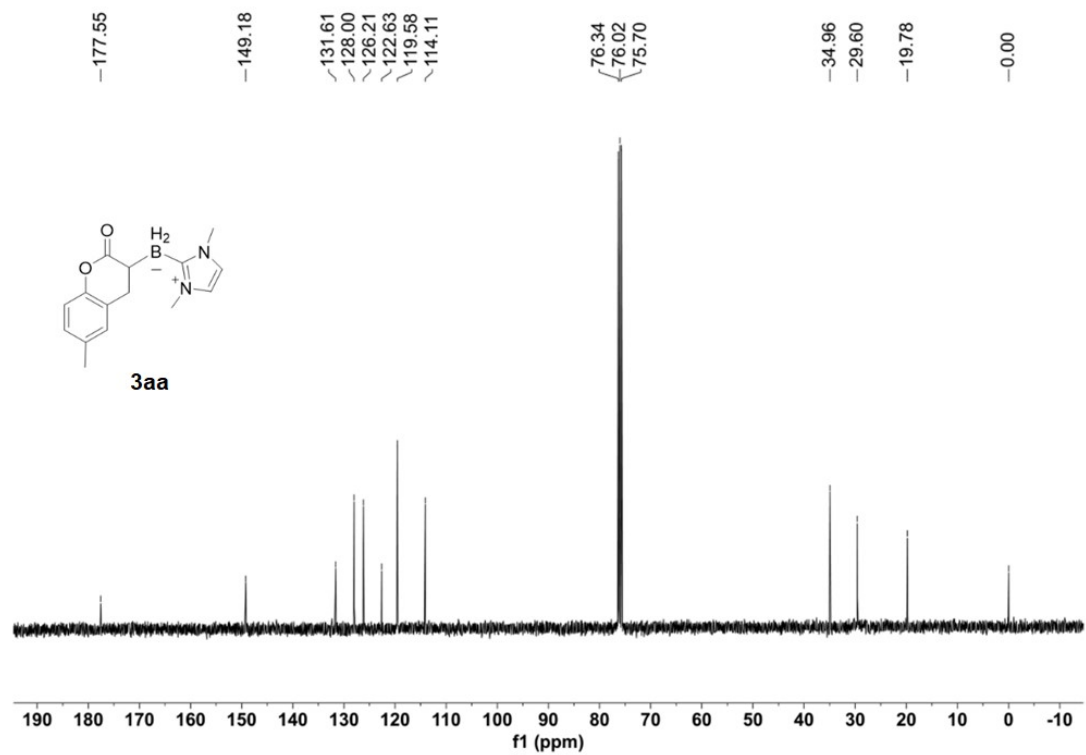

Fig. S59 <sup>13</sup>C NMR (100 MHz, CDCl<sub>3</sub>) spectrum for **3aa**.

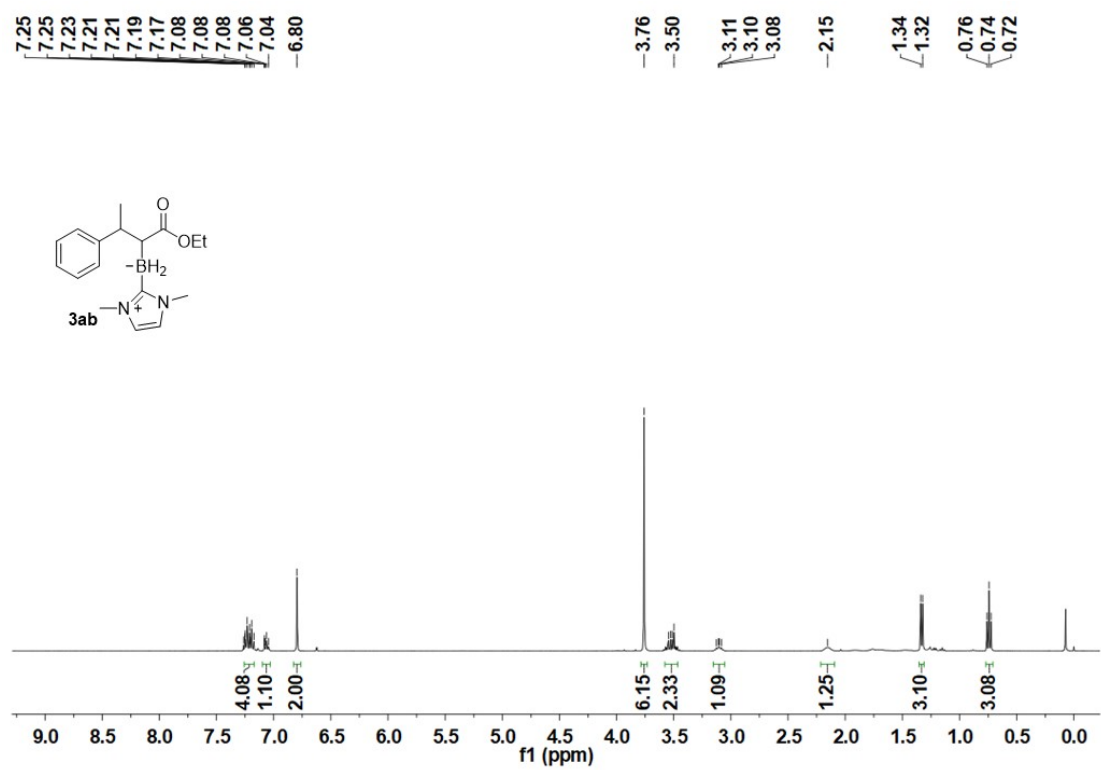

Fig. S60 <sup>1</sup>H NMR (400 MHz, CDCl<sub>3</sub>) spectrum for **3ab**.

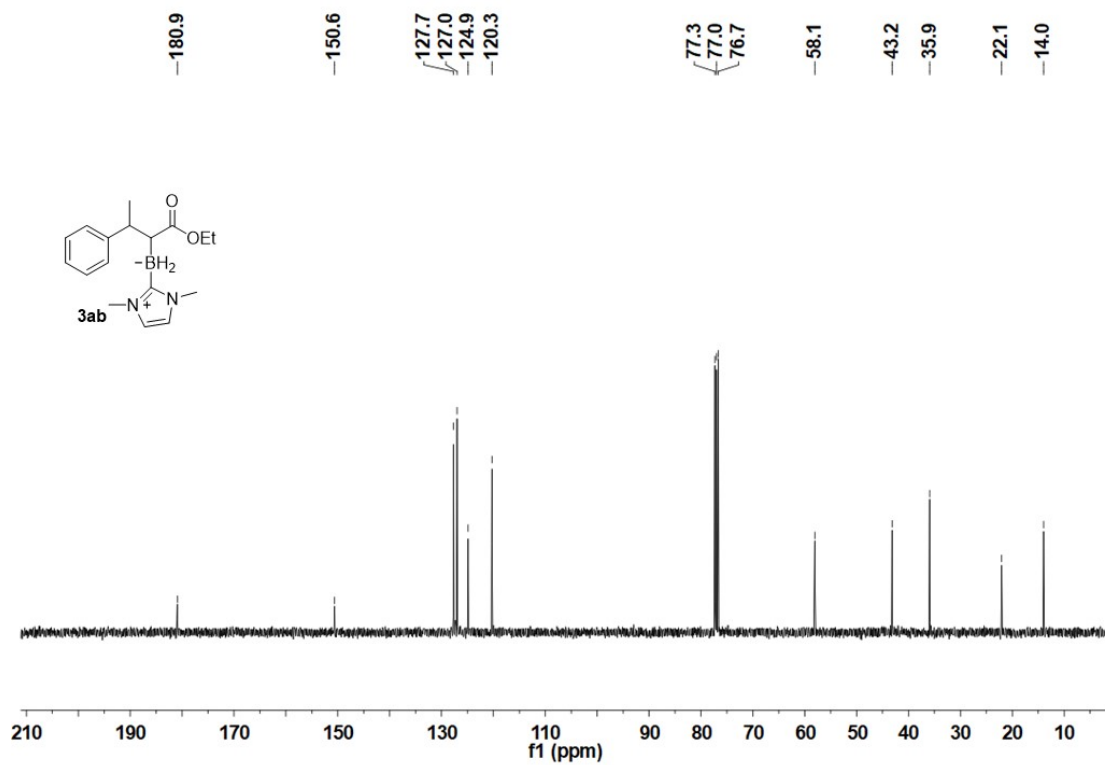

Fig. S61 <sup>13</sup>C NMR (100 MHz, CDCl<sub>3</sub>) spectrum for **3ab**.

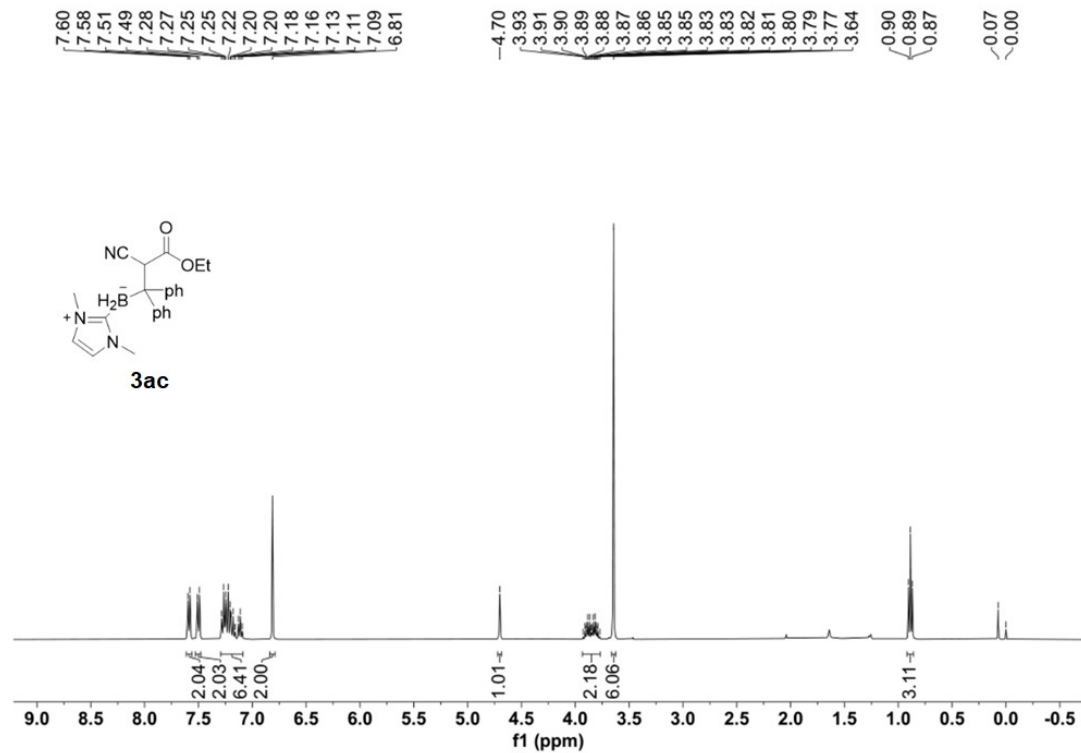

Fig. S62 <sup>1</sup>H NMR (400 MHz, CDCl<sub>3</sub>) spectrum for **3ac**.



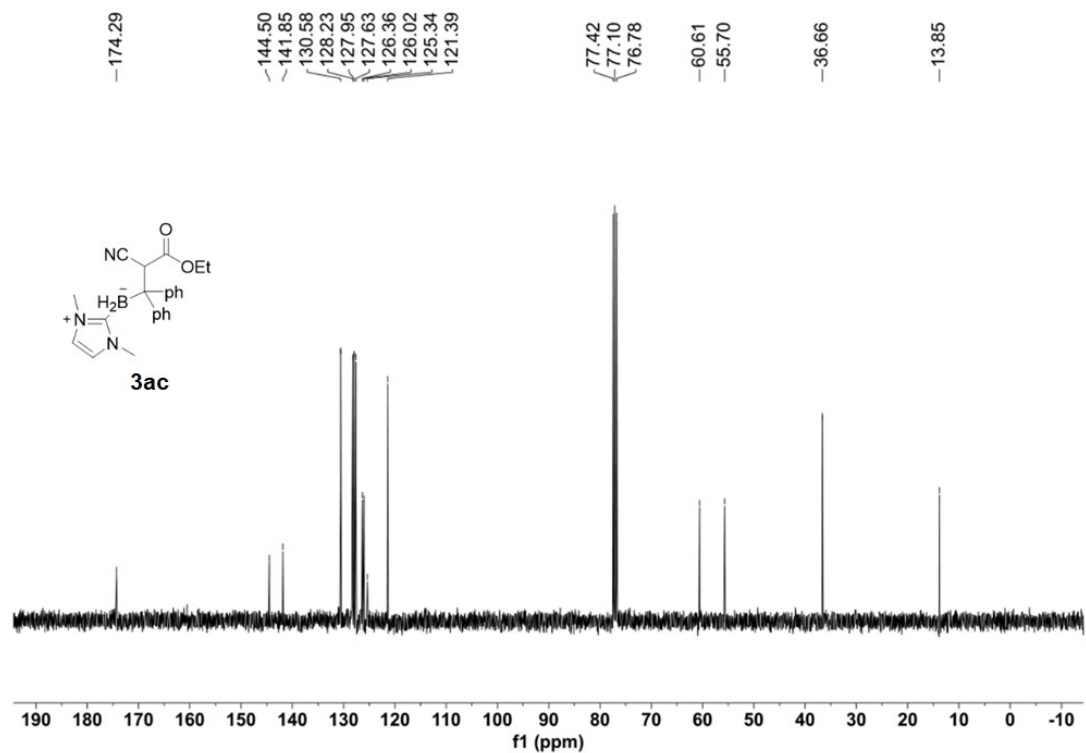

Fig. S63  $^{13}\text{C}$  NMR (100 MHz,  $\text{CDCl}_3$ ) spectrum for **3ac**.

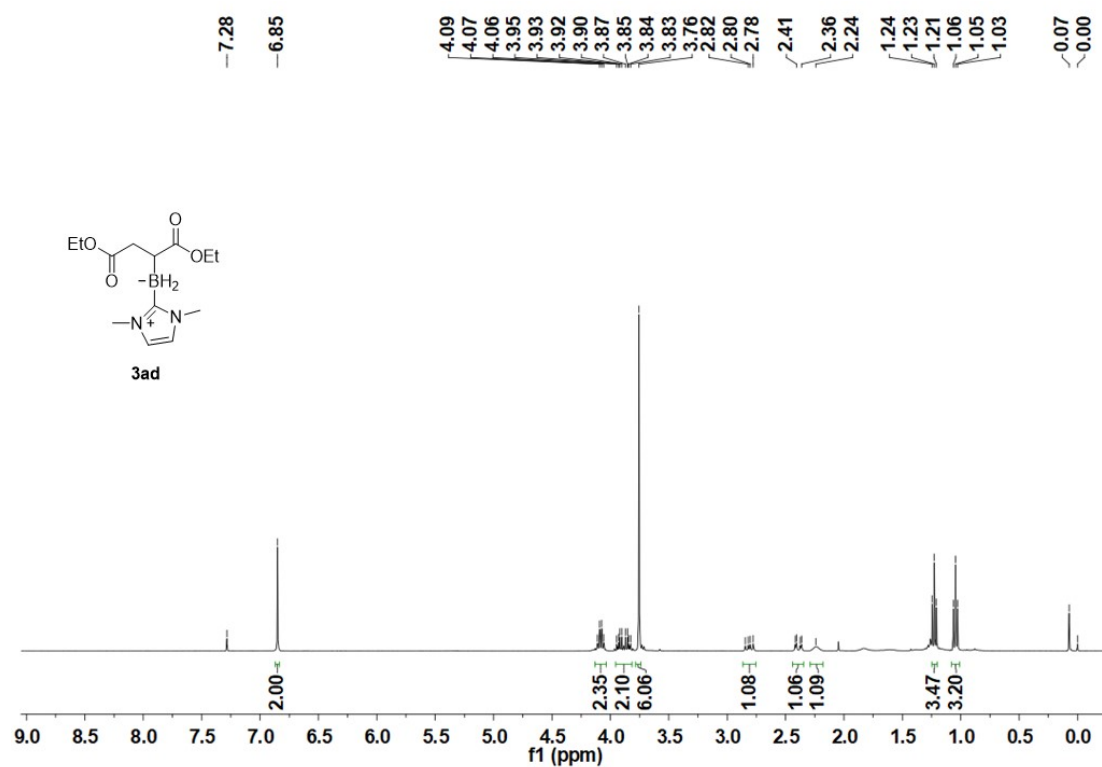

Fig. S64  $^1\text{H}$  NMR (400 MHz,  $\text{CDCl}_3$ ) spectrum for **3ad**.

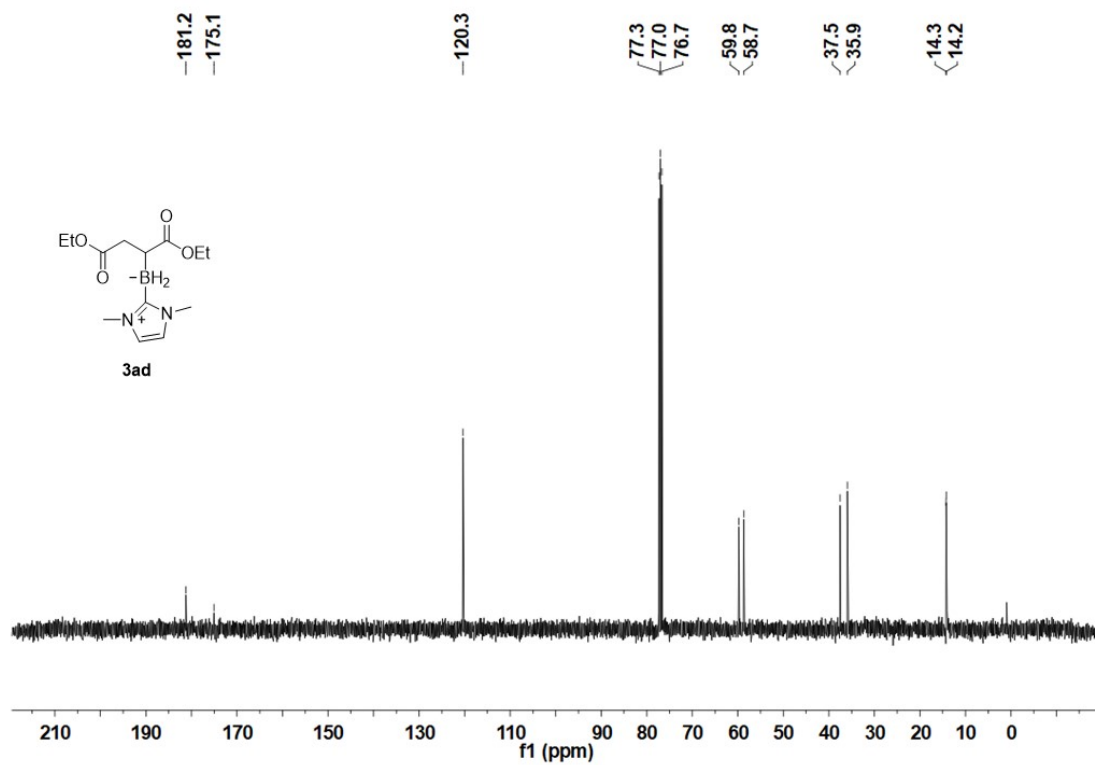

**Fig. S65**  $^{13}\text{C}$  NMR (100 MHz,  $\text{CDCl}_3$ ) spectrum for **3ad**.

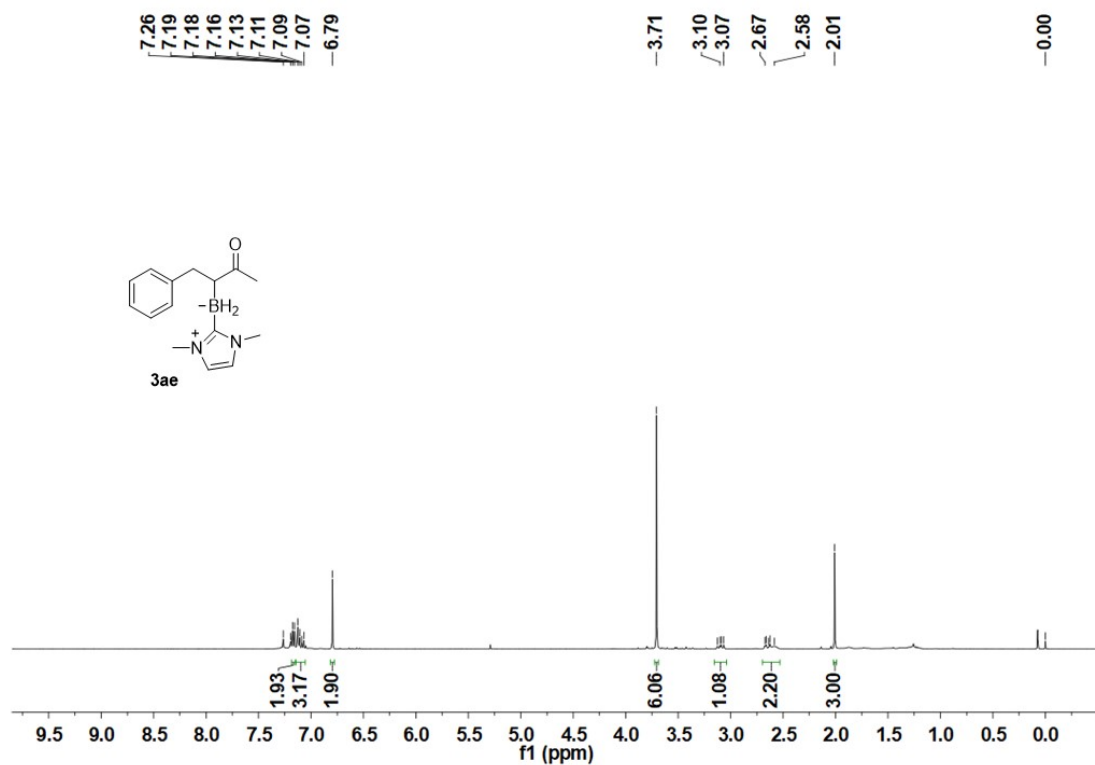

**Fig. S66**  $^1\text{H}$  NMR (400 MHz,  $\text{CDCl}_3$ ) spectrum for **3ae**.

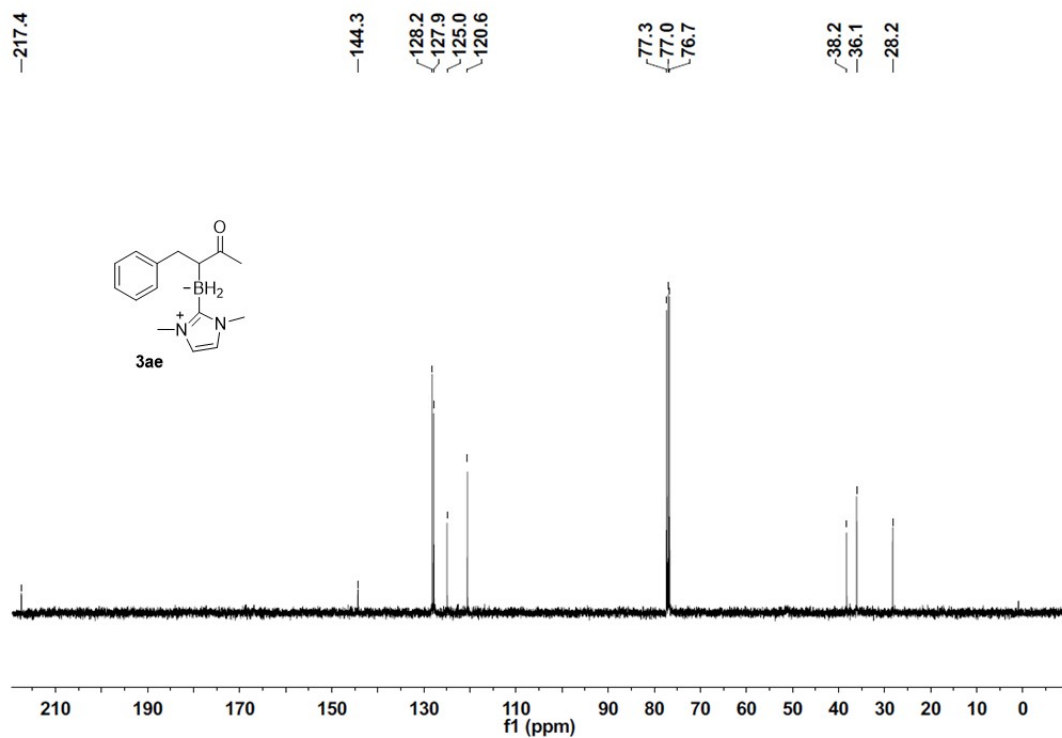

Fig. S67 <sup>13</sup>C NMR (100 MHz, CDCl<sub>3</sub>) spectrum for **3ae**.

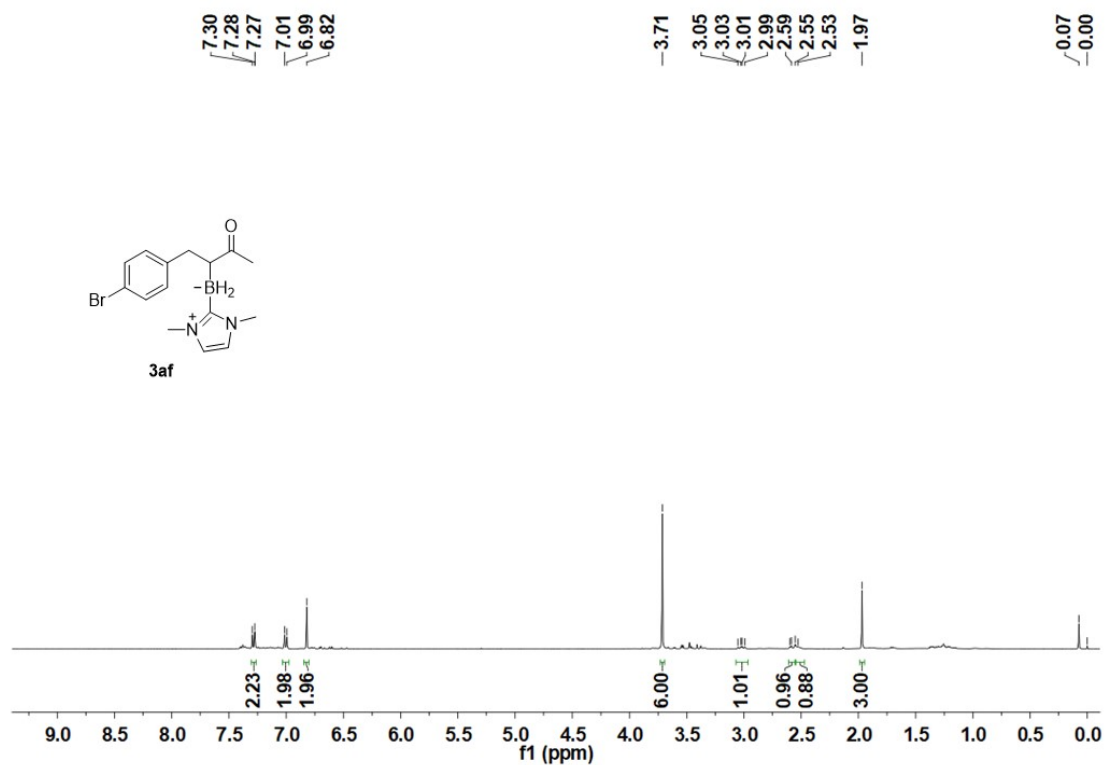

Fig. S68 <sup>1</sup>H NMR (400 MHz, CDCl<sub>3</sub>) spectrum for **3af**.

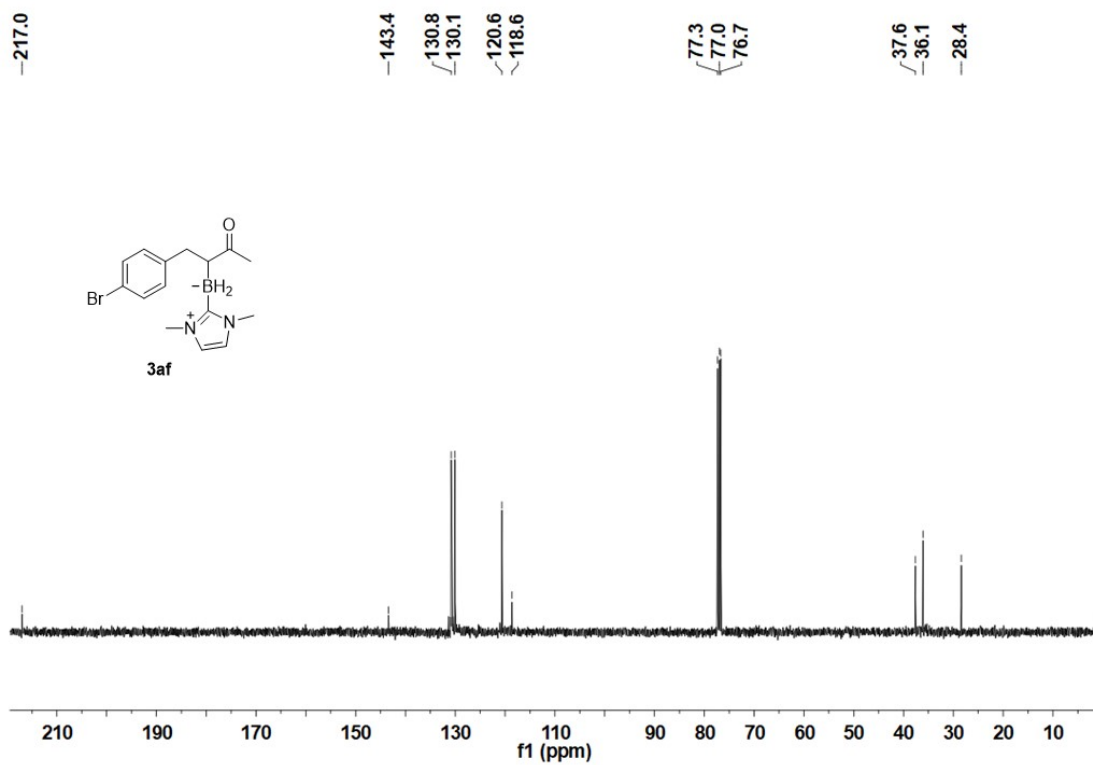

**Fig. S69**  $^{13}\text{C}$  NMR (100 MHz,  $\text{CDCl}_3$ ) spectrum for **3af**.

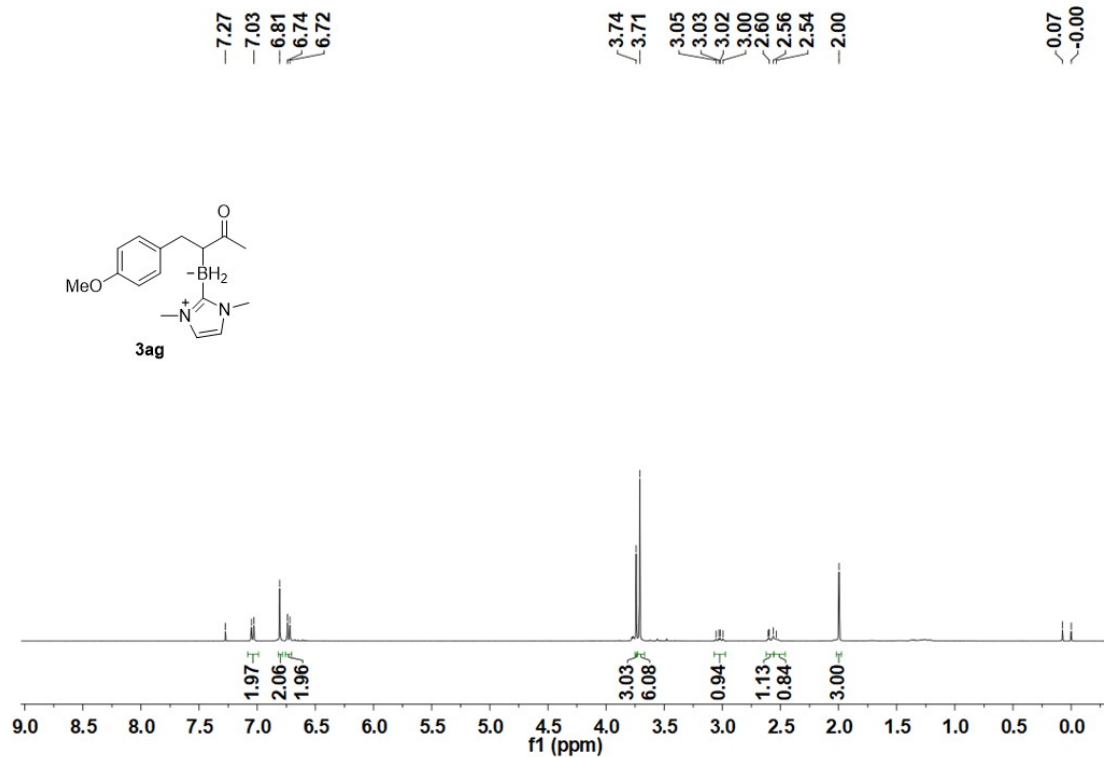

**Fig. S70**  $^1\text{H}$  NMR (400 MHz,  $\text{CDCl}_3$ ) spectrum for **3ag**.

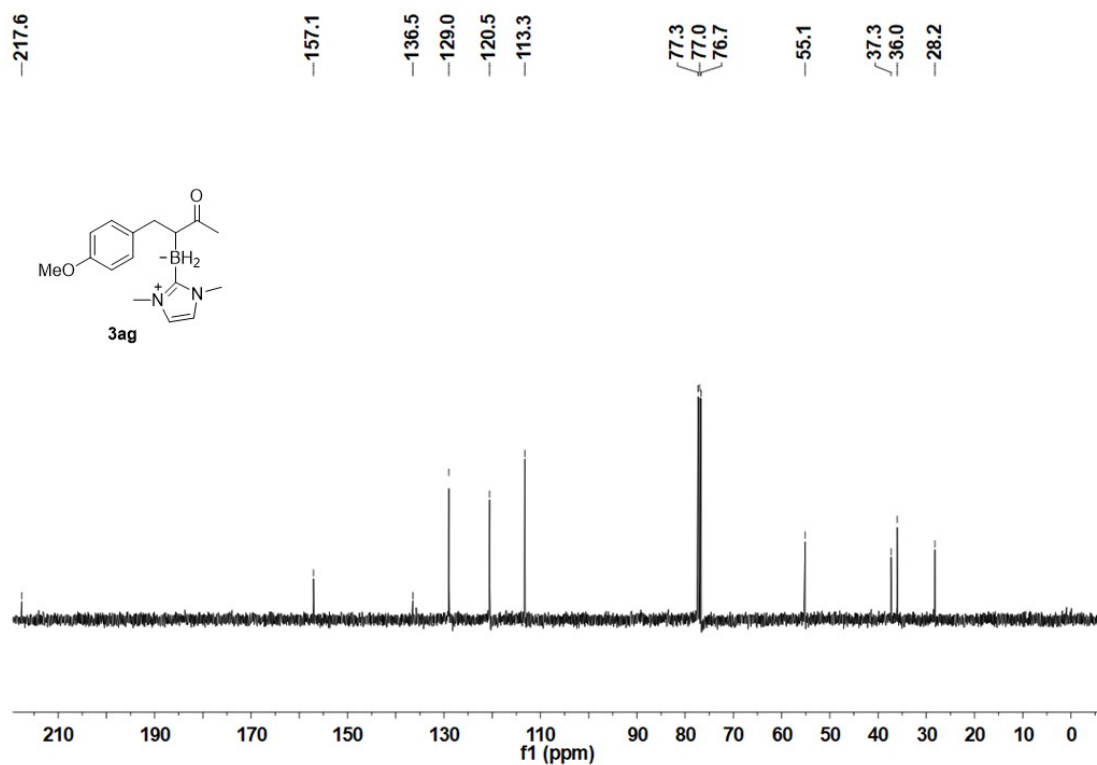

Fig. S71  $^{13}\text{C}$  NMR (100 MHz,  $\text{CDCl}_3$ ) spectrum for **3ag**.

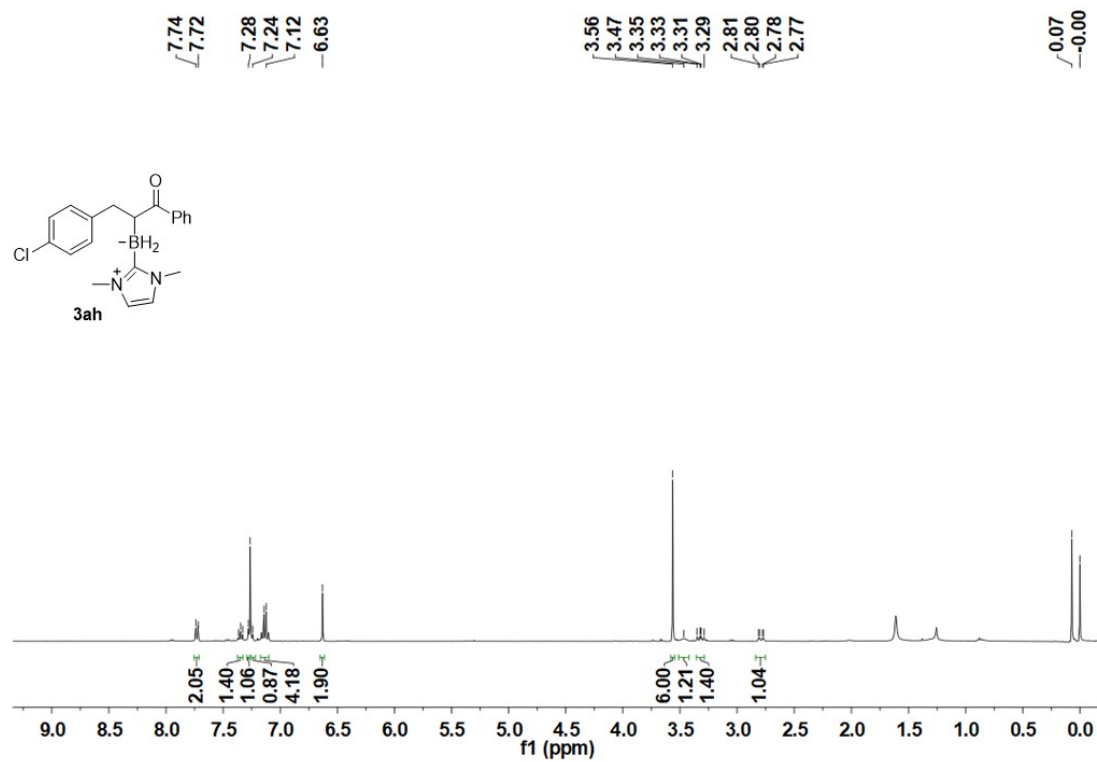

Fig. S72  $^1\text{H}$  NMR (400 MHz,  $\text{CDCl}_3$ ) spectrum for **3ah**.

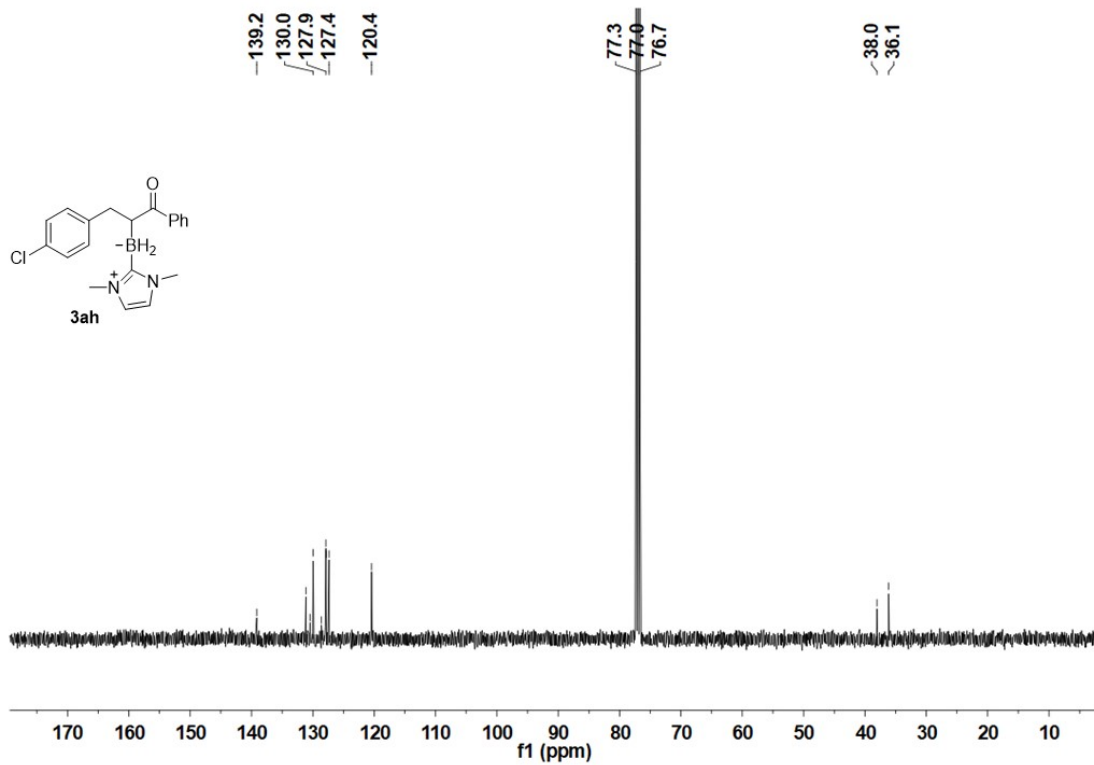

**Fig. S73**  $^{13}\text{C}$  NMR (100 MHz,  $\text{CDCl}_3$ ) spectrum for **3ah**.

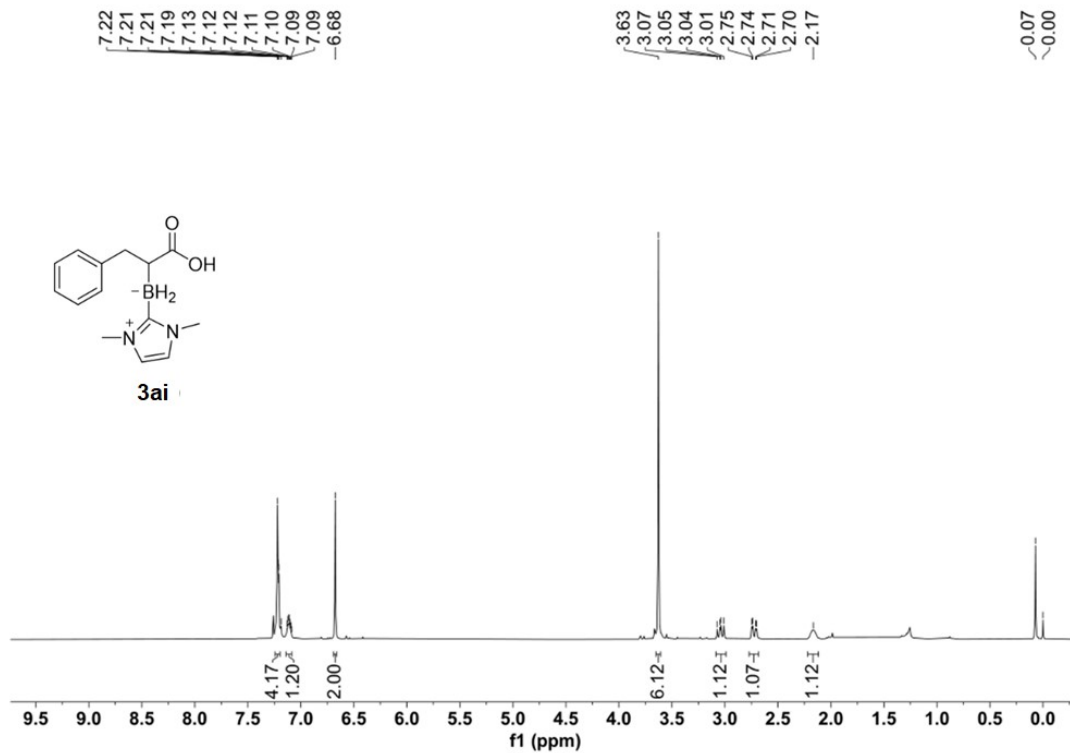

**Fig. S74**  $^1\text{H}$  NMR (400 MHz,  $\text{CDCl}_3$ ) spectrum for **3ai**.

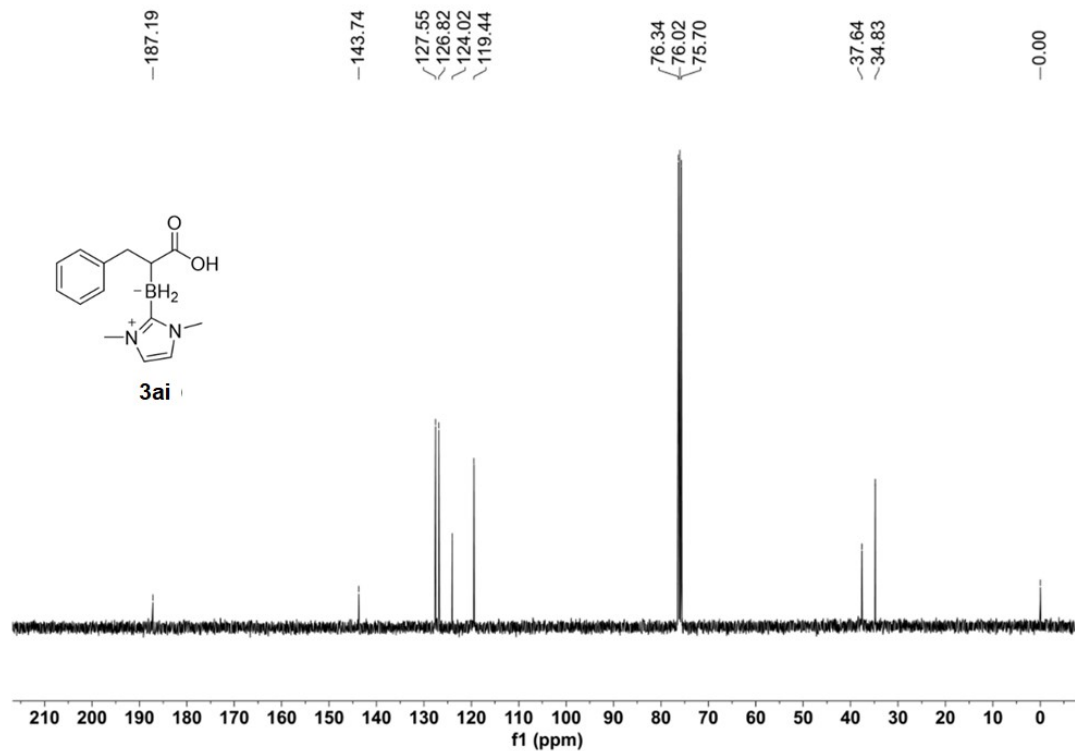

Fig. S75  $^{13}\text{C}$  NMR (100 MHz,  $\text{CDCl}_3$ ) spectrum for **3ai**.

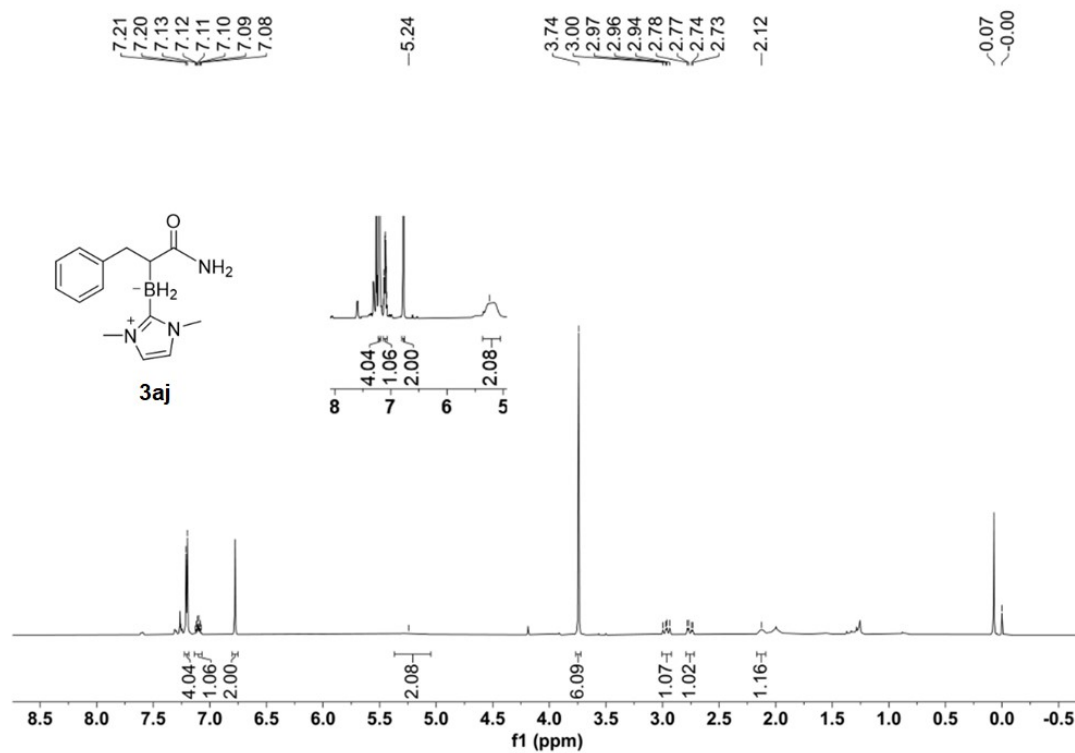

Fig. S76  $^1\text{H}$  NMR (400 MHz,  $\text{CDCl}_3$ ) spectrum for **3aj**.

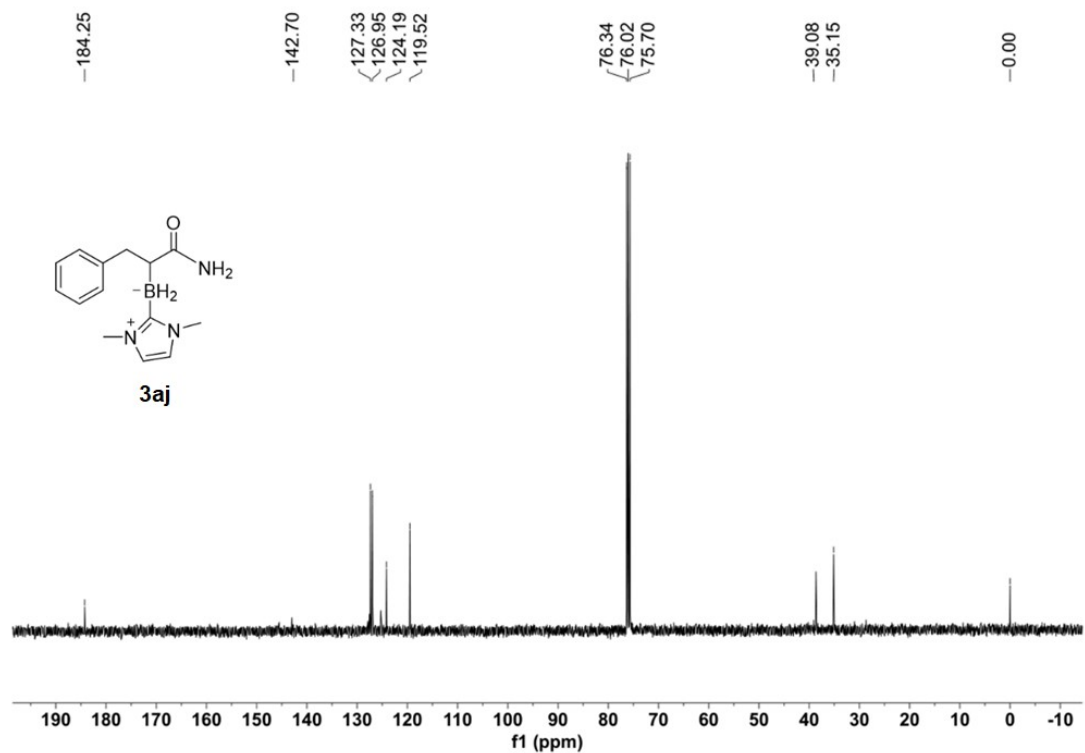

Fig. S77 <sup>13</sup>C NMR (100 MHz, CDCl<sub>3</sub>) spectrum for **3aj**.

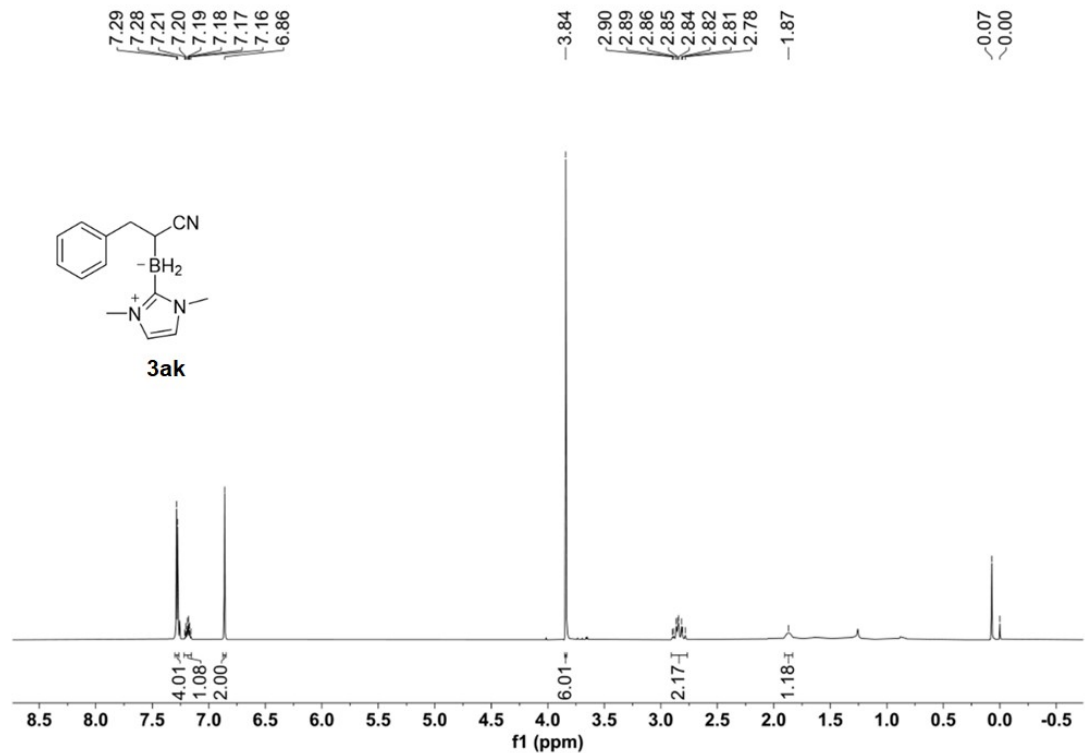

Fig. S78 <sup>1</sup>H NMR (400 MHz, CDCl<sub>3</sub>) spectrum for **3ak**.



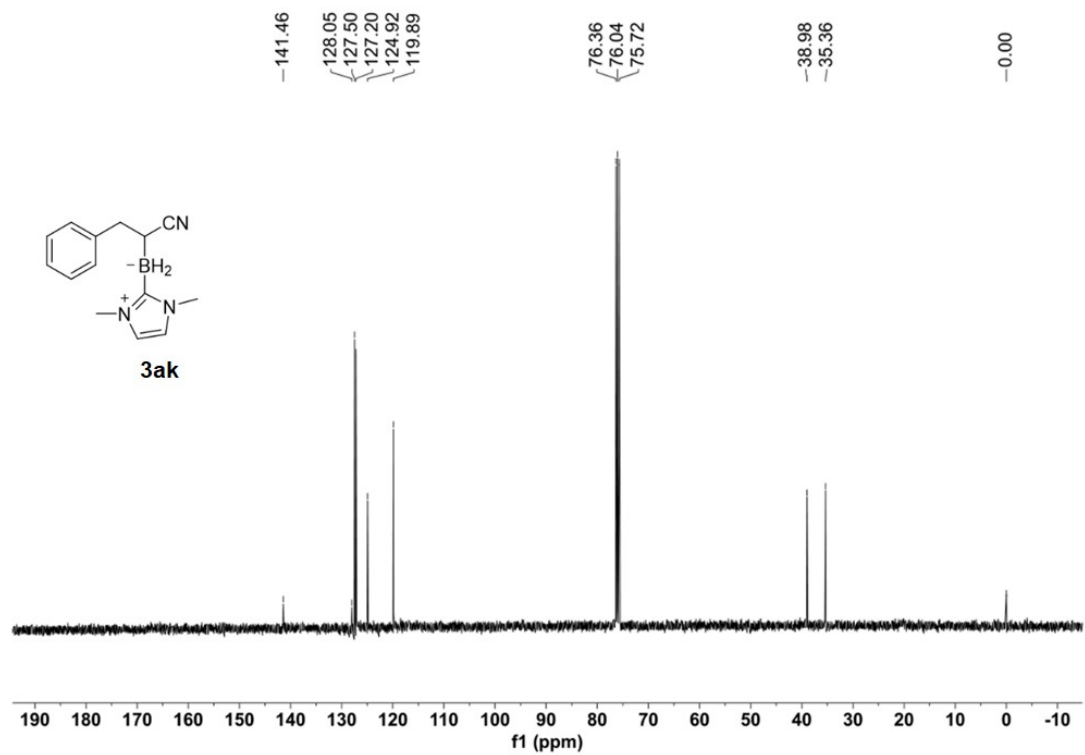

**Fig. S79** <sup>13</sup>C NMR (100 MHz, CDCl<sub>3</sub>) spectrum for **3ak**.

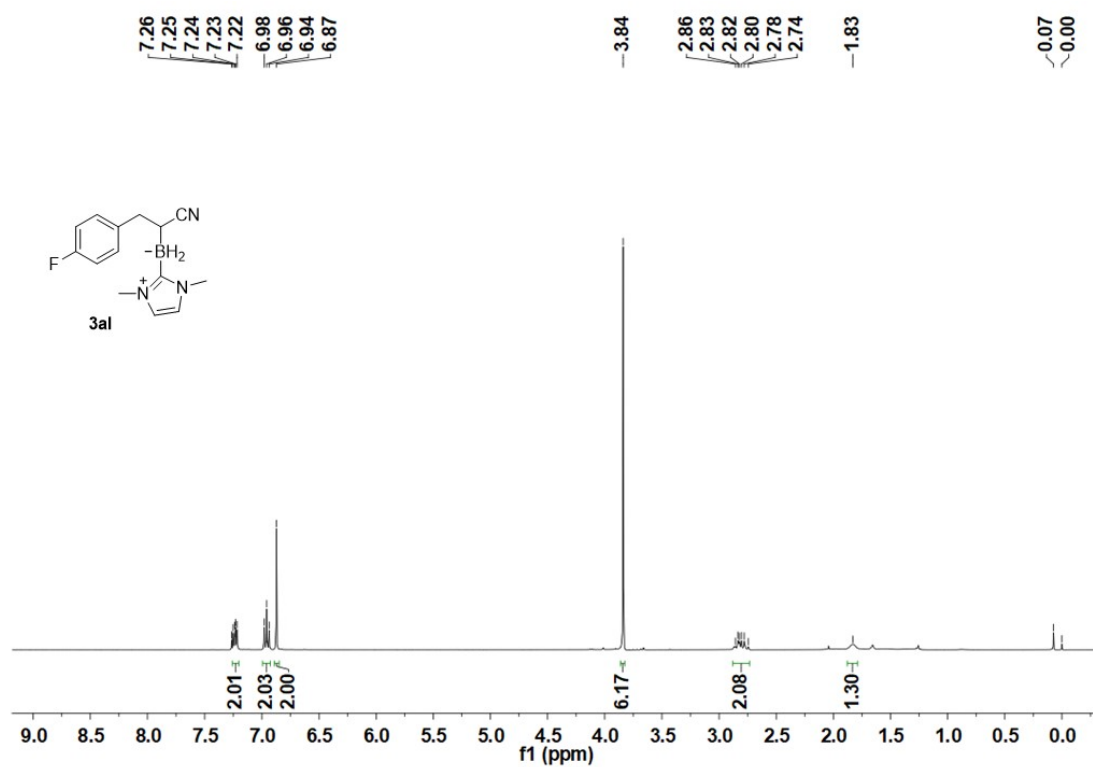

**Fig. S80** <sup>1</sup>H NMR (400 MHz, CDCl<sub>3</sub>) spectrum for **3al**.

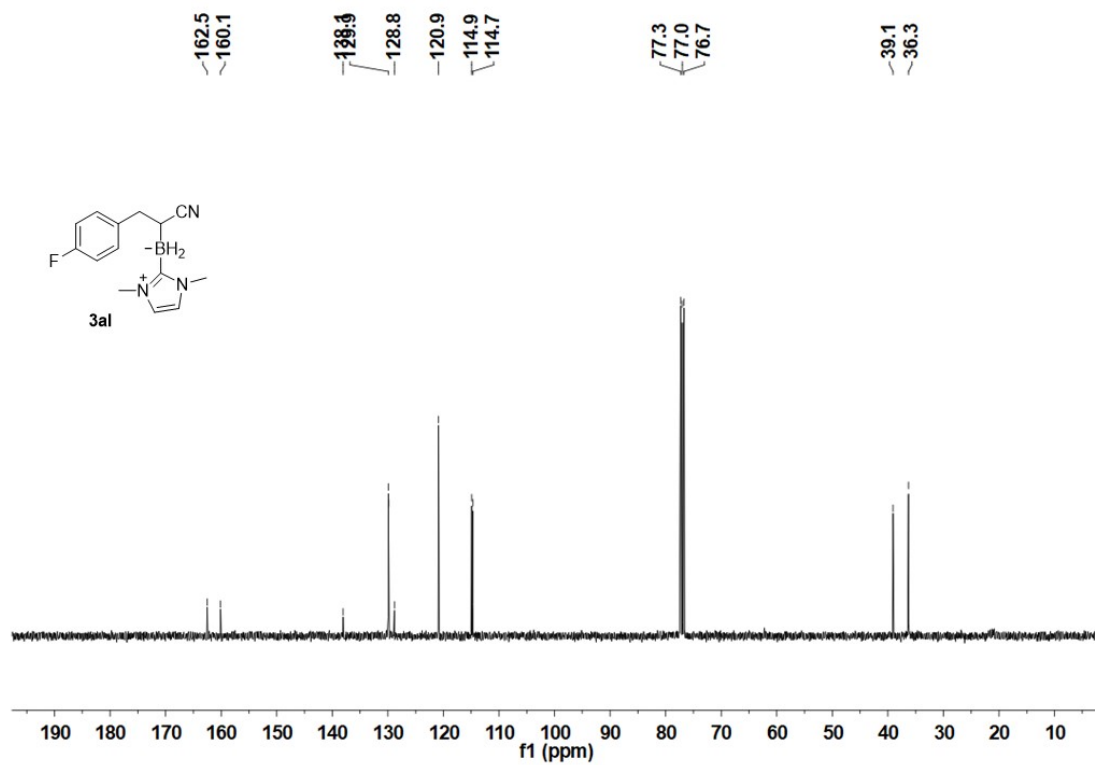

**Fig. S81** <sup>13</sup>C NMR (100 MHz, CDCl<sub>3</sub>) spectrum for **3al**.

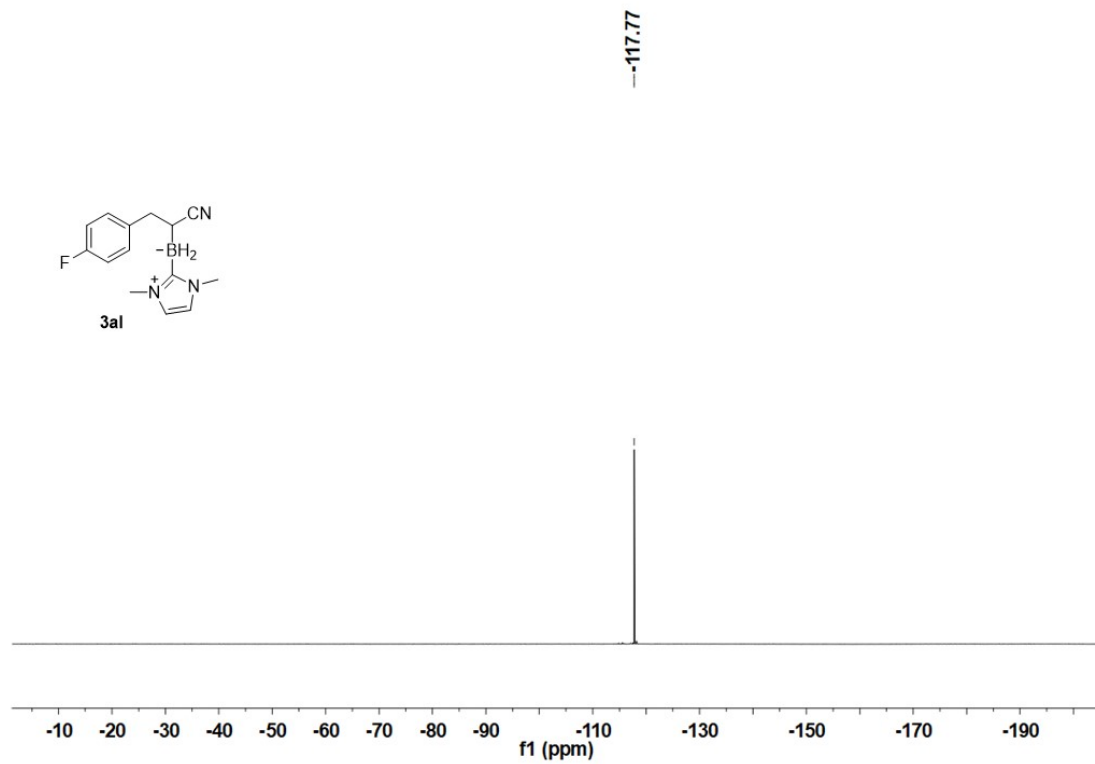

**Fig. S82** <sup>19</sup>F NMR (376 MHz, CDCl<sub>3</sub>) spectrum for **3al**.

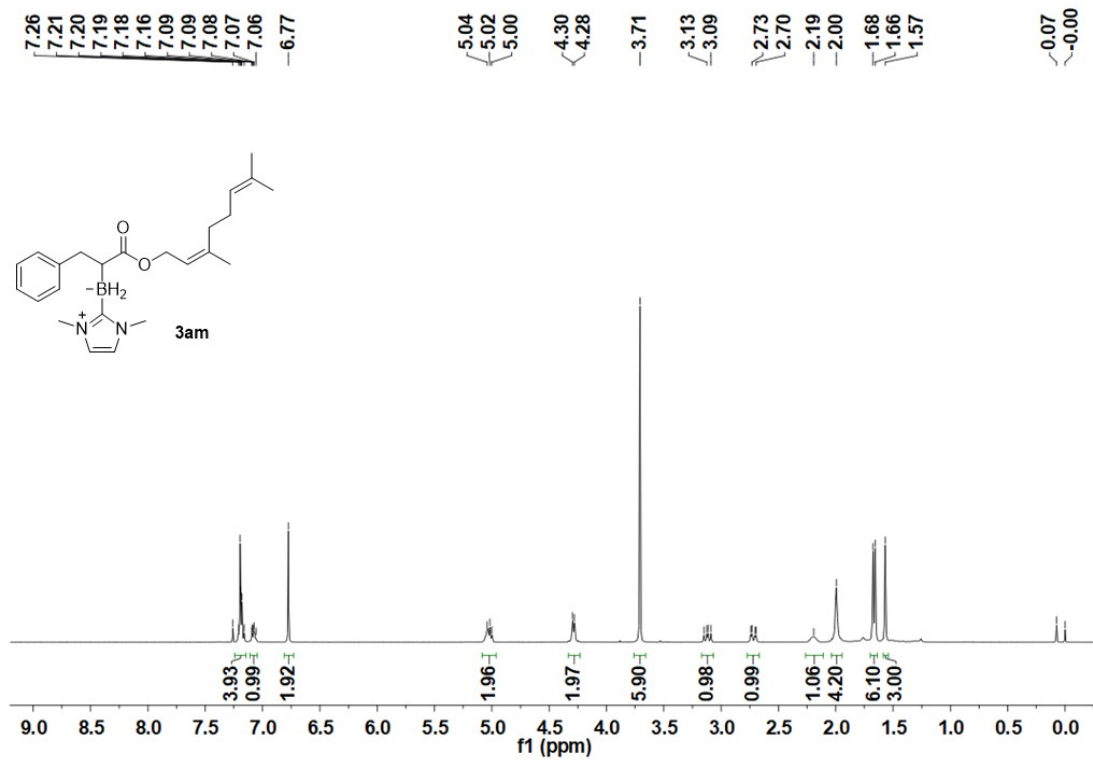

**Fig. S83**  $^1\text{H}$  NMR (400 MHz,  $\text{CDCl}_3$ ) spectrum for **3am**.

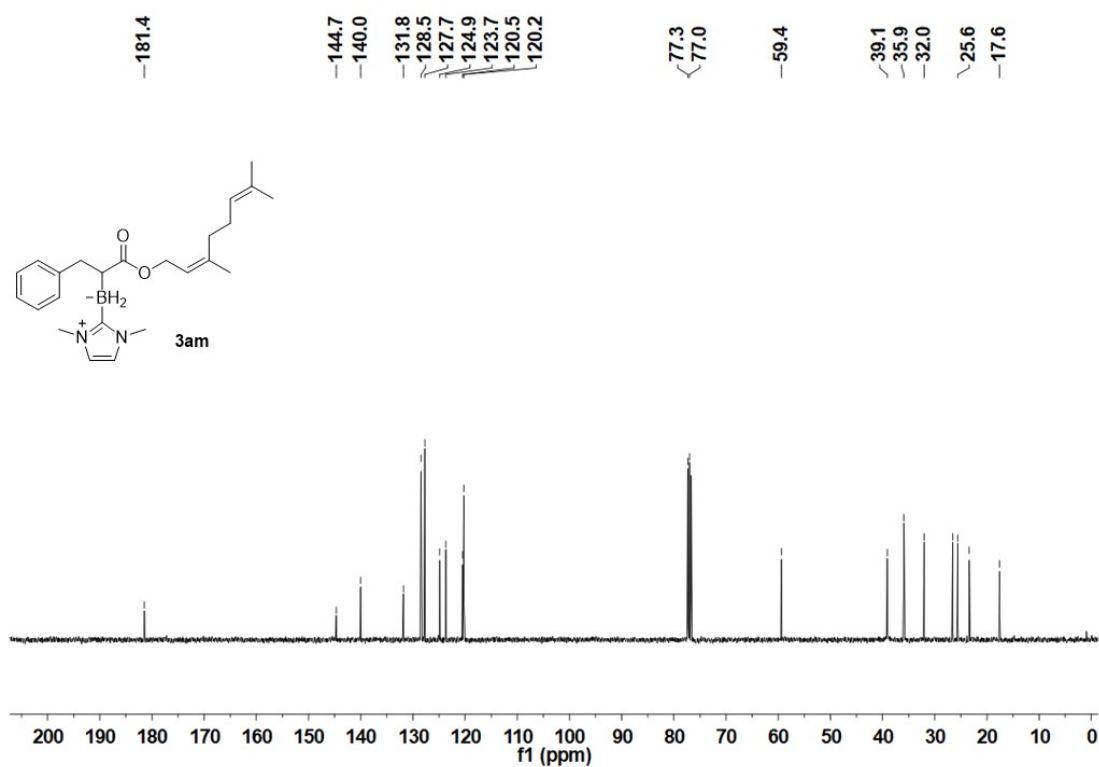

**Fig. S84**  $^{13}\text{C}$  NMR (100 MHz,  $\text{CDCl}_3$ ) spectrum for **3am**.

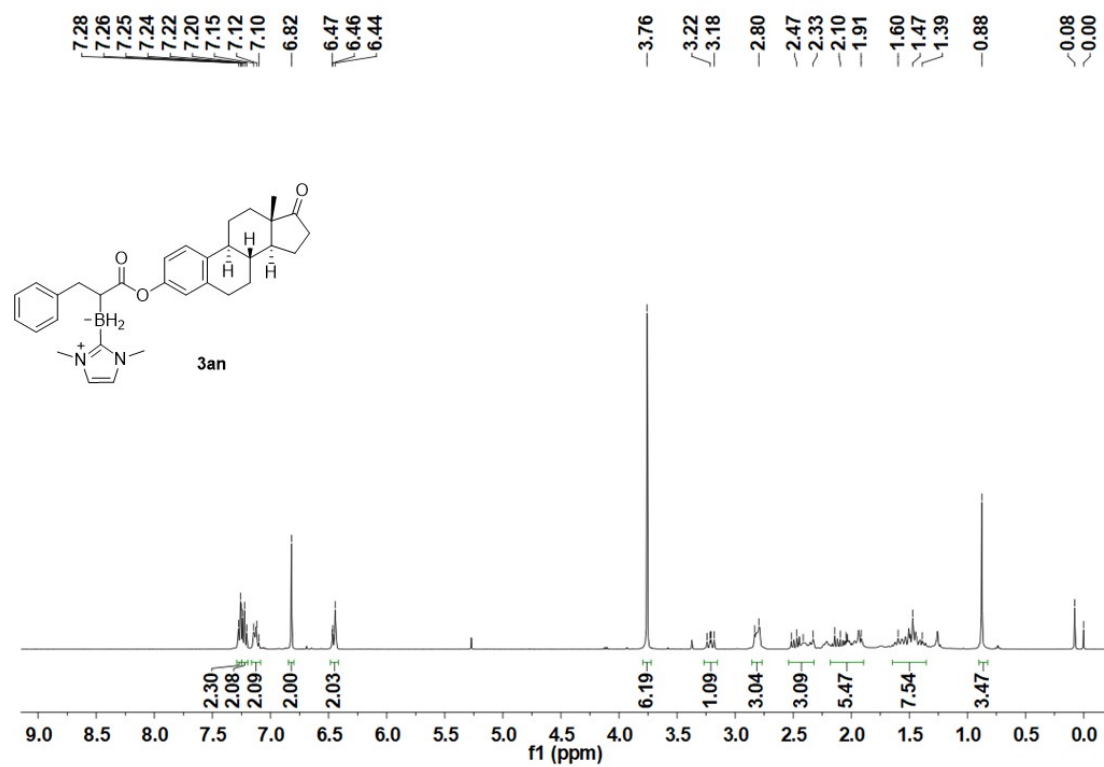

**Fig. S85**  $^1\text{H}$  NMR (400 MHz,  $\text{CDCl}_3$ ) spectrum for **3an**.

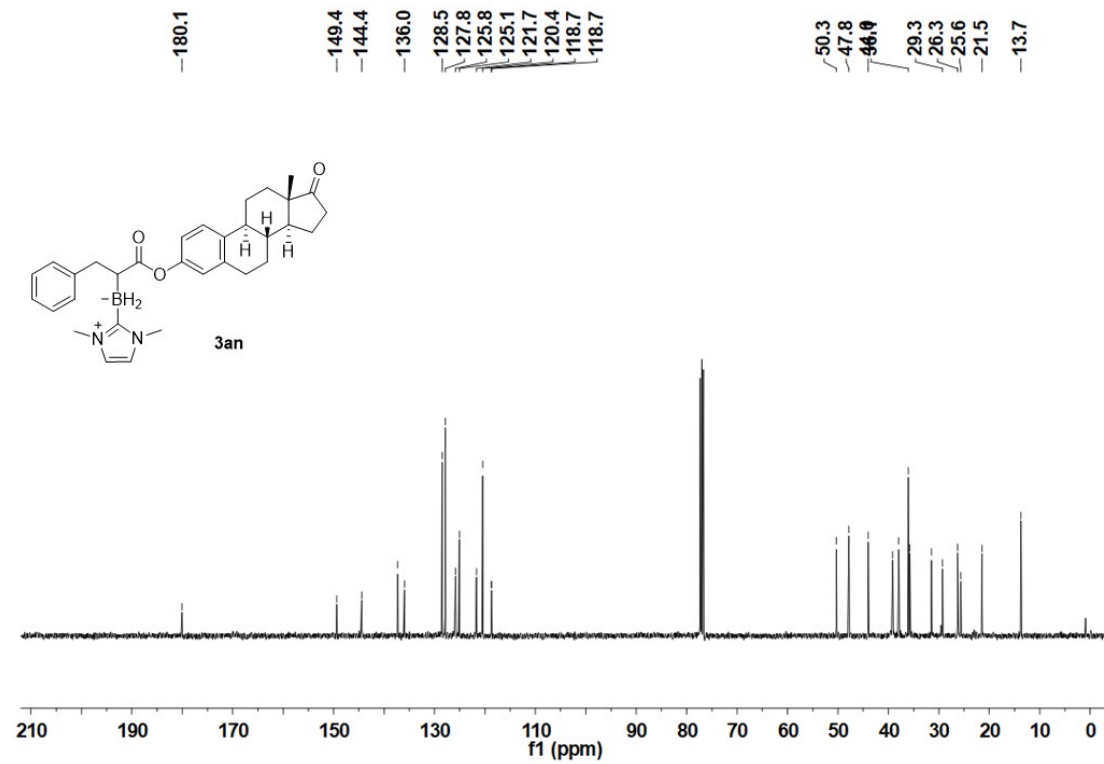

**Fig. S86**  $^{13}\text{C}$  NMR (100 MHz,  $\text{CDCl}_3$ ) spectrum for **3an**.

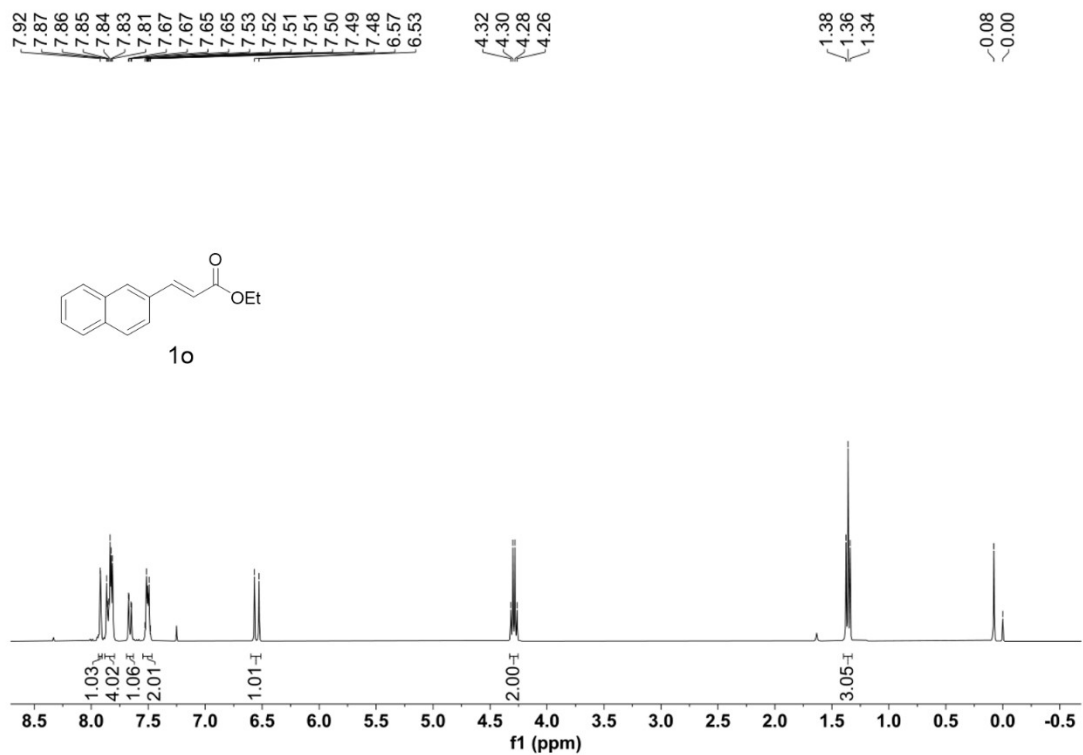

**Fig. S87** <sup>1</sup>H NMR (400 MHz, CDCl<sub>3</sub>) spectrum for **1o**.

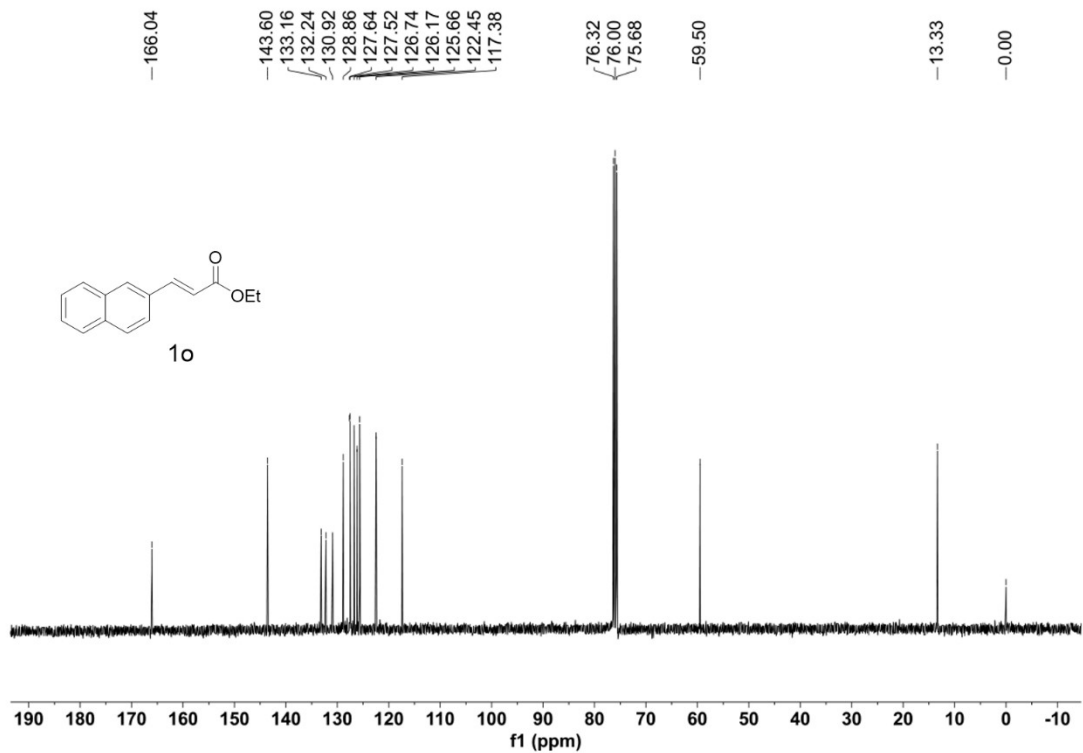

**Fig. S88** <sup>13</sup>C NMR (100 MHz, CDCl<sub>3</sub>) spectrum for **1o**.

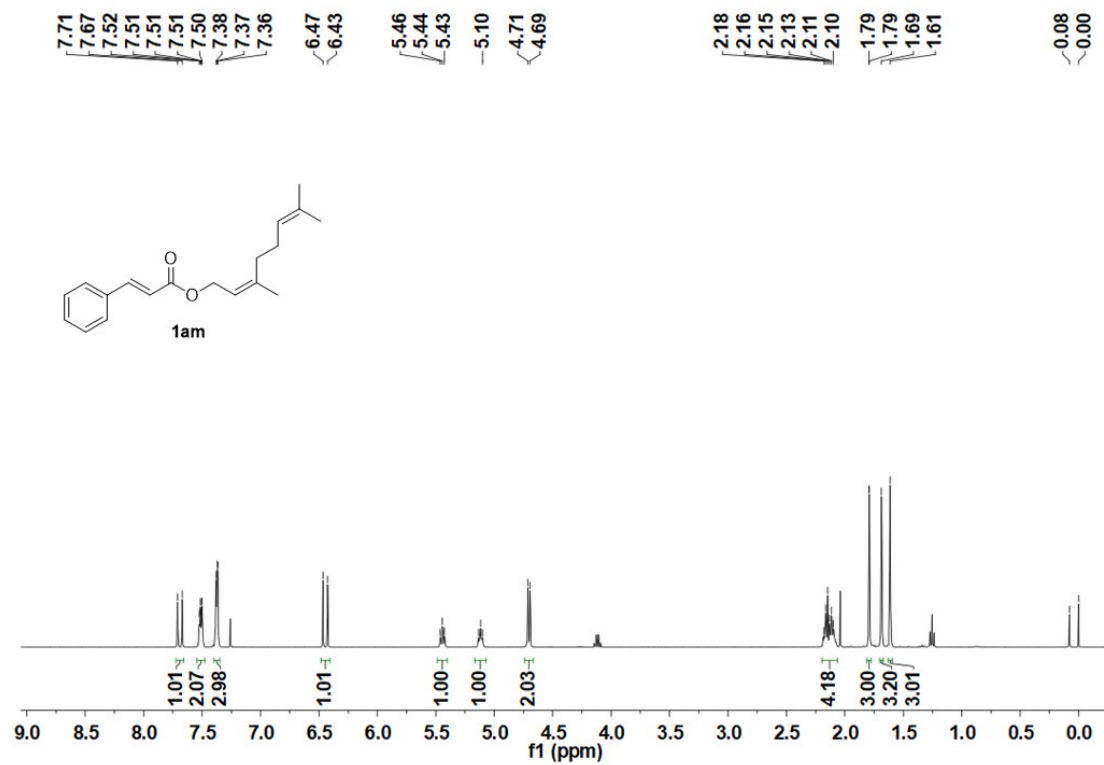

**Fig. S89** <sup>1</sup>H NMR (400 MHz, CDCl<sub>3</sub>) spectrum for **1am**.

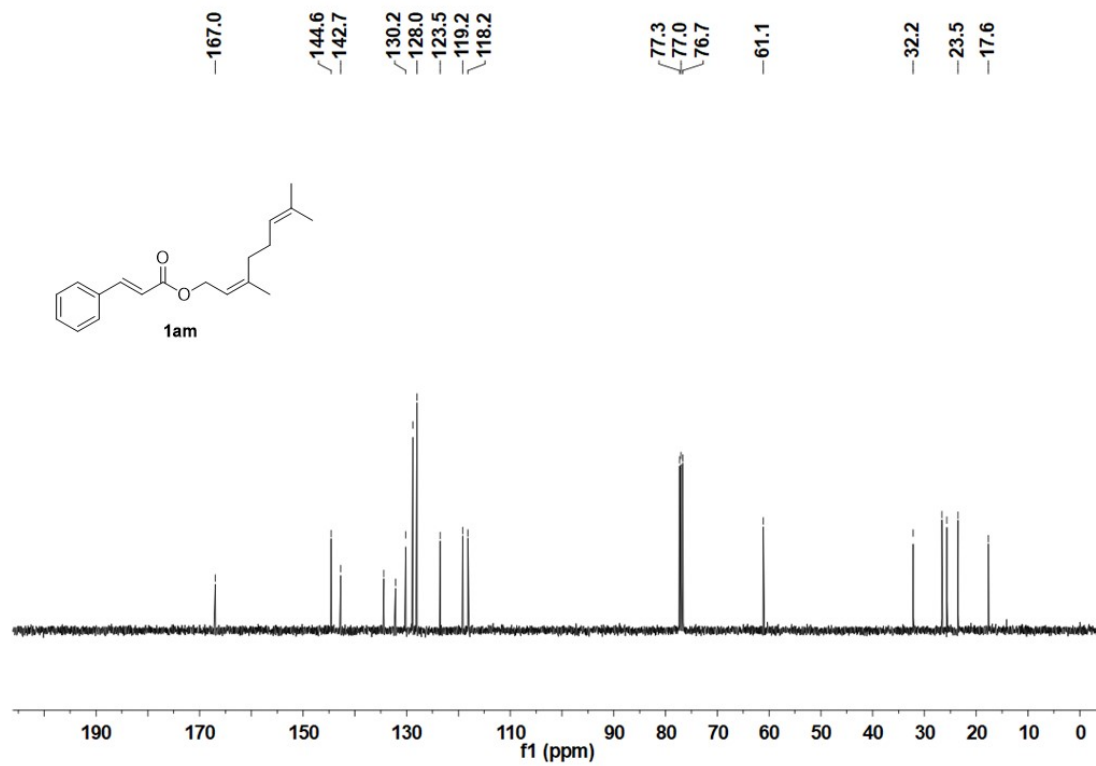

**Fig. S90** <sup>13</sup>C NMR (100 MHz, CDCl<sub>3</sub>) spectrum for **1am**.

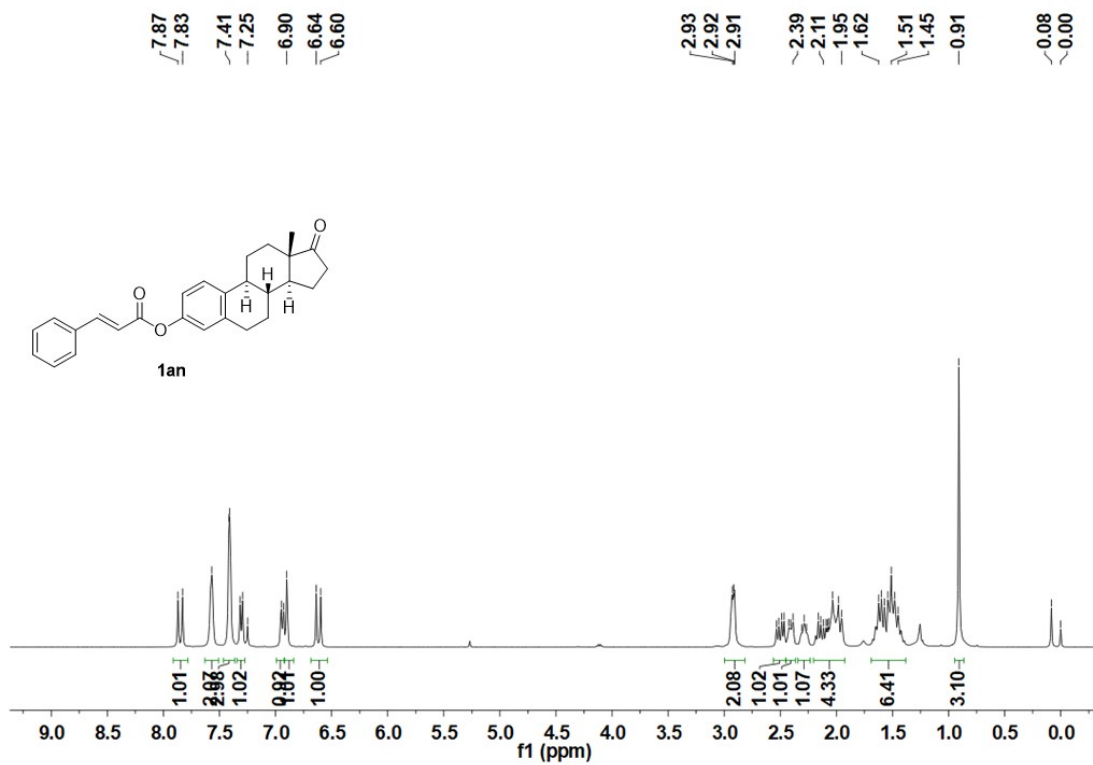

Fig. S91 <sup>1</sup>H NMR (400 MHz, CDCl<sub>3</sub>) spectrum for **1an**.

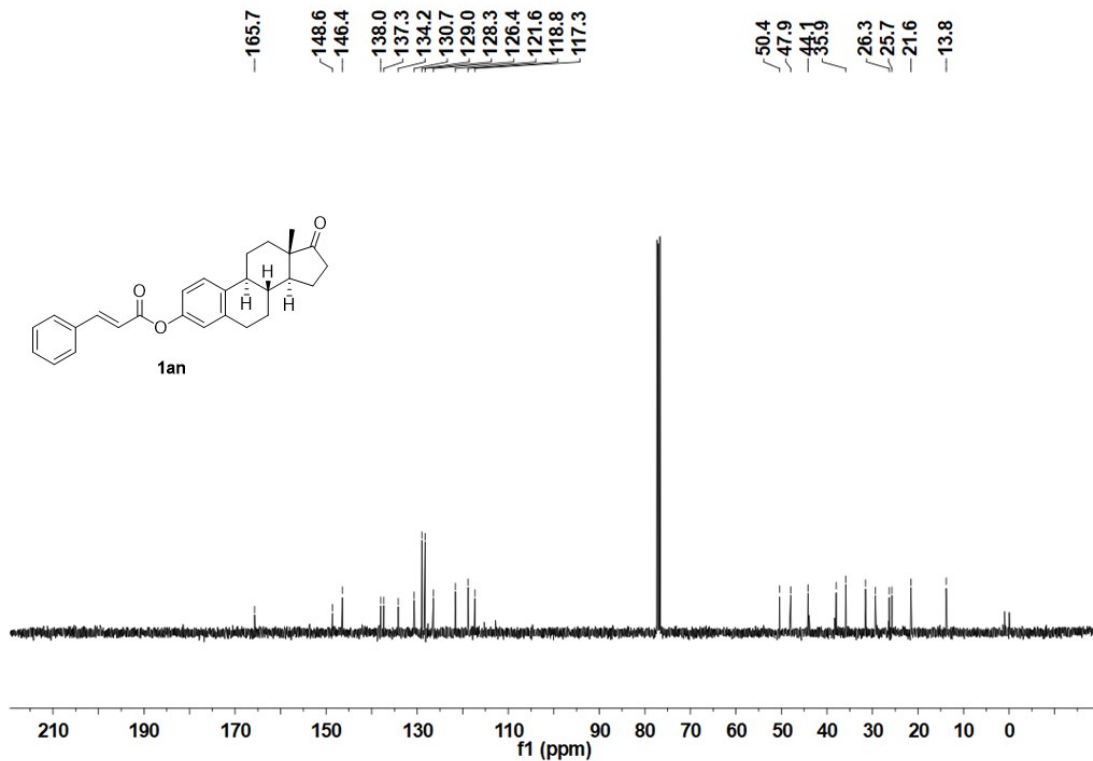

Fig. S92 <sup>13</sup>C NMR (100 MHz, CDCl<sub>3</sub>) spectrum for **1an**.
